# Supplementary material for: Synthetic Spike-in Standards Improve Run-Specific Systematic Error Analysis for DNA and RNA Sequencing
Source: PLoS One. 2012 Jul 31;7(7):e41356. doi: 10.1371/journal.pone.0041356 (PMC3409179; doi:10.1371/journal.pone.0041356)
Supplement: Code S3 — Matlab script to calculate purity probability thresholds for spike-in bases. (M) [file pone.0041356.s008.m]

%find bases that have no experiments with pprobability of purity>xx

clear all
fold1='C:\Documents and Settings\jzook\My Documents\genomics\erccs\';
if 1==1
for i=1:6 %read in probpurthresh data calculated in calcpurpropthresh.m
    if i==1
        pupfile='NIAIlluminarun_bfast_a3_255to100_q0';
    elseif i==2
        pupfile='SOLiD68_20080916_NIST_F3_a3_255to100_q0';
    elseif i==3
        pupfile='NIAIlluminarun_bfast_a3_255to100_q30';
    elseif i==4
        pupfile='SOLiD68_20080916_NIST_F3_a3_255to100_q50';
    elseif i==5
        pupfile='MP1_all_dot_F3_a3_q50';
    elseif i==6
        pupfile='MP1_all_dot_R3_a3_q50';
    end
    probpurthresh(:,:,i*3-2)=xlsread([fold1 pupfile 'probpurthreshallqerr30.xlsx']);
    probpurthresh(:,:,i*3-1)=xlsread([fold1 pupfile 'probpurthreshforqerr30.xlsx']);
    probpurthresh(:,:,i*3)=xlsread([fold1 pupfile 'probpurthreshrevqerr30.xlsx']);
end

%generate matrix with ercc and base position numbers
ercclens = importdata([fold1 'ercclenspolyA.txt']); %import lengths of erccs
erccnums=[];
for i=1:size(ercclens,1)
    erccnums=[erccnums;[ercclens(i,1)*ones(ercclens(i,2),1) (1:ercclens(i,2))']];
end

pileups=size(probpurthresh,1);
probthresh=0.95; %minimum acceptable probability that purity > purthresh
purthresh=[0.95 0.98 0.99 0.995 0.998 0.999];
for j=1:size(purthresh,2)
    k=1;
    l=1;
    m=1;
    clear impuritylist
    for i=1:pileups
        if i>1 && erccnums(i,1)>erccnums(i-1,1)
            l=l+1;
        end
        if sum(probpurthresh(i,j,:)>probthresh,3)==0 %if all experiments have probability<probthresh of high purity
            %add row to table j
            impuritylist(k,:)=erccnums(i,:);
            k=k+1;
        else %add to list of pure bases for later random selection of pure bases
            if erccnums(i,2) < ercclens(l,2)-73
                puritylist(m,:)=erccnums(i,:);
                m=m+1;
            end
        end
    end
    xlswrite([fold1 'erccnumspolyA' num2str(purthresh(j)) 'qerr30.xlsx'],impuritylist)
    xlswrite([fold1 'erccnumspolyA' num2str(purthresh(j)) 'qerr30pur.xlsx'],puritylist)
end
end

if 1==0  %exclude numbases bases at poly-A tail
    %ercclens = importdata([fold1 'ercclenspolyA.txt']); %import lengths of erccs
    ercclens = importdata([fold1 'ercclens.txt']); %import lengths of erccs
    for x=1:1 %9
    %numbases=round(0.1*x*ercclens(:,2));
    numbases=50;
    k=1;
    for i=1:size(ercclens,1)
        for j=ercclens(i,2)-numbases:ercclens(i,2)
%        for j=ercclens(i,2)-numbases(i):ercclens(i,2)
            polyAlist(k,:)=[ercclens(i,1) j];
            k=k+1;
        end
    end
    %xlswrite([fold1 'erccnumsskiplast' num2str(x) '0percent.xlsx'],polyAlist)
    xlswrite([fold1 'erccnumsskiplast' num2str(numbases) 'bases.xlsx'],polyAlist)
    end
end
    
