# Supplementary material for: Synthetic Spike-in Standards Improve Run-Specific Systematic Error Analysis for DNA and RNA Sequencing
Source: PLoS One. 2012 Jul 31;7(7):e41356. doi: 10.1371/journal.pone.0041356 (PMC3409179; doi:10.1371/journal.pone.0041356)
Supplement: Code S8 — R script to analyze SOLiD BQSR data. (R) [file pone.0041356.s013.R]

# Analysis file for spike-in vs. genome BQSR comparison study for SOLiD reads
# 
# Author: samarov
###############################################################################
library(fields)
library(fBasics)

## Here we need to break things down by cycles
#dinucDf$nMis[dinucDf$nMis==0] <- 1e-10
#dinucDf$prop <- 1-dinucDf$nMis/dinucDf$nObs
str(dinucDf)
# 'data.frame':	4608 obs. of  8 variables:
#  $ QualityScore : Factor w/ 36 levels "5","6","7","8",..: 1 2 3 4 5 6 7 8 9 10 ...
#  $ Dinuc        : Factor w/ 16 levels "AA","AC","AG",..: 1 1 1 1 1 1 1 1 1 1 ...
#  $ flow         : Factor w/ 2 levels "FC1","FC2": 1 1 1 1 1 1 1 1 1 1 ...
#  $ rna          : Factor w/ 2 levels "BLM1","BLM2": 1 1 1 1 1 1 1 1 1 1 ...
#  $ method       : Factor w/ 2 levels "ERCCs","hg18": 1 1 1 1 1 1 1 1 1 1 ...
#  $ nMismatches  : int  100 74 38 81 42 54 15 43 20 32 ...
#  $ nObservations: int  4061 3595 2090 8255 3229 3805 3311 3986 3030 3911 ...
#  $ Qemp         : num  16.1 16.9 17.4 20.1 18.9 ...

str(cycleDf)
# 'data.frame':	13800 obs. of  8 variables:
#  $ QualityScore : Factor w/ 36 levels "5","6","7","8",..: 1 2 3 4 5 6 7 8 9 10 ...
#  $ Cycle        : Factor w/ ncycle levels "2","3","4","5",..: 1 1 1 1 1 1 1 1 1 1 ...
#  $ flow         : Factor w/ 2 levels "FC1","FC2": 1 1 1 1 1 1 1 1 1 1 ...
#  $ rna          : Factor w/ 2 levels "BLM1","BLM2": 1 1 1 1 1 1 1 1 1 1 ...
#  $ method       : Factor w/ 2 levels "ERCCs","hg18": 1 1 1 1 1 1 1 1 1 1 ...
#  $ nMismatches  : int  1 5 2 3 2 4 2 3 1 2 ...
#  $ nObservations: int  133 208 62 626 236 363 290 375 262 394 ...
#  $ Qemp         : num  21.2 16.2 14.9 23.2 20.7 ...


qs <- unique(as.character(cycleDf$QualityScore))
nqs <- length(qs)
nqs
# [1] 36

## Starting out with cycle
ucycle <- unique(as.character(cycleDf$Cycle))
ncycle <- length(ucycle)
ncycle
# [1] ncycle

## First pass based on Justin's suggestions, breaking it down by QualityScore
## as well
resCycleP <- resCycleD <- matrix(0, ncycle, nqs)
for(i in 1:ncycle){
	print(i)
	for(j in 1:nqs){
		sbst <- (cycleDf$Cycle == ucycle[i]) & 
				(cycleDf$QualityScore == qs[j])
		z <- all(cycleDf$nMismatches[sbst] == 0)
		if((sum(sbst) > 0) & !z){
			gC <- glm(cbind(nMismatches, nObservations - nMismatches) ~ 
							method + rna,
					data = cycleDf, subset = (Cycle == ucycle[i]) & 
							(QualityScore == qs[j]), 
					family = binomial(link = "logit"))
			chck <- predict(gC, type = "response")
			if(any(chck < 1e-10) | any(chck > 1-1e-10)){
				dif <- anva <- NA
			}
			else{
				bC <- coef(gC)
				bPERCC0 <- sum(bC * c(1, 0, 0))
				bPHG180 <- sum(bC * c(1, 1, 0))
				dif <- log(exp(bPERCC0)/(1 + exp(bPERCC0)),10) - 
						log(exp(bPHG180)/(1 + exp(bPHG180)),10)
				anva <- anova(gC, test = "Chisq")[["P(>|Chi|)"]][2]
			}
		}
		else{
			dif <- anva <- NA
		}
		resCycleD[i,j] <- dif*10
		resCycleP[i,j] <- anva
	}
}

pdf("plots/pval_errc_hg18_cycle_WT.pdf", height = 8, width = 11)
par(mfrow = c(2,1))
par(mar = c(5.1,4.1,2.1,5.1))
image(1:ncycle, 1:nqs, resCycleP, col = rampPalette(n = 64, name = "blue2red"), 
		main = "P-values, ERCC vs HG18, aggregated on Dinuc (log ratio)",
		xlab = "Cycle", ylab = "Reported Quality Score", xaxt = "n", yaxt = "n")
axis(side = 1, at = 1:ncycle, labels = ucycle, cex = .5, las = 2)
axis(side = 2, at = 1:nqs, labels = as.character(unique(cycleDf$QualityScore)))
image.plot(resCycleP, add = TRUE, legend.only = TRUE,
		col = rampPalette(n = 64, name = "blue2red"))

## Which are significant
image(1:ncycle, 1:nqs, resCycleD, col = rampPalette(n = 64, name = "blue2red"), 
		main = "Estimated differences in mismatch scores",
		xlab = "Cycle", ylab = "Reported Quality Score", xaxt = "n", yaxt = "n")
axis(side = 1, at = 1:ncycle, labels = ucycle, cex = .5, las = 2)
axis(side = 2, at = 1:nqs, labels = as.character(unique(cycleDf$QualityScore)))
image.plot(resCycleD, add = TRUE, legend.only = TRUE,
		col = rampPalette(n = 64, name = "blue2red"))

dev.off()

## Next looking at dinuc
udinuc <- unique(as.character(dinucDf$Dinuc))
ndinuc <- length(udinuc)

## First pass based on Justin's suggestions, breaking it down by QualityScore
## as well
resDinucP <- resDinucD <- matrix(0, ndinuc, nqs)
for(i in 1:ndinuc){
	print(i)
	for(j in 1:nqs){
		gD <- glm(cbind(nMismatches, nObservations - nMismatches) ~ 
						method,
				data = dinucDf, subset = (Dinuc == udinuc[i]) & 
						(QualityScore == qs[j]), 
				family = binomial(link = "logit"))
		
		bD <- coef(gD)
		bPERCC0 <- sum(bD * c(1, 0, 0))
		bPHG180 <- sum(bD * c(1, 1, 0))
		dif <- log(exp(bPERCC0)/(1 + exp(bPERCC0)),10) - 
				log(exp(bPHG180)/(1 + exp(bPHG180)),10)
#		dif <- bPERCC0 - bPHG180
		resDinucD[i,j] <- dif*10
		resDinucP[i,j] <- anova(gD, test = "Chisq")[["P(>|Chi|)"]][2]
	}
}


pdf("plots/pval_errc_hg18_dinuc_WT.pdf", height = 8, width = 11)
par(mfrow = c(2, 1))
par(mar = c(5.1,4.1,2.1,5.1))
km <- kmeans(resDinucP, 3)$clus
okm <- order(km)
image(1:16, 1:nqs, resDinucP[okm, ], col = rampPalette(n = 64, name = "blue2red"), 
		main = "P-values, ERCC vs HG18, aggregated on Cycle (log ratio)",
		xlab = "Dinuc", ylab = "Reported Quality Score", xaxt = "n", yaxt = "n")
axis(side = 1, at = 1:16, labels = udinuc[okm], cex = .5, las = 2)
axis(side = 2, at = 1:nqs, labels = as.character(unique(cycleDf$QualityScore)))
image.plot(resDinucP[okm,], add = TRUE, legend.only = TRUE,
		col = rampPalette(n = 64, name = "blue2red"))

## Which are significant
image(1:16, 1:nqs, resDinucD[okm,], col = rampPalette(n = 64, name = "blue2red"), 
		main = "Estimated differences in mismatch scores",
		xlab = "Dinuc", ylab = "Reported Quality Score", xaxt = "n", yaxt = "n")
axis(side = 1, at = 1:16, labels = udinuc[okm], cex = .5, las = 2)
axis(side = 2, at = 1:nqs, labels = as.character(unique(dinucDf$QualityScore)))
image.plot(resDinucD[okm,], add = TRUE, legend.only = TRUE, 
		col = rampPalette(n = 64, name = "blue2red"))

dev.off()

tiff("plots/diff_errc_hg18_cycle_dinuc_WT.tif", height = 600, width = 1300)
#par(fin=c(30,60))
par(mfrow = c(1, 2))
par(mar = c(6.1,6.1,3.6,6.8))

image(1:ncycle, 1:nqs, resCycleD, col = rampPalette(n = 64, name = "blue2red"), 
		main="SOLiD", cex.main=3, xlab = "", ylab = "Reported Quality Score", cex.lab=3, xaxt = "n", yaxt = "n", zlim=c(-15,15))
axis(side = 1, at = (1:ceiling(max(as.numeric(ucycle))/5))*5, labels = as.character((1:ceiling(max(as.numeric(ucycle))/5))*5), cex.axis = 2, las = 2)
axis(side = 2, at = 1:nqs, labels = as.character(unique(cycleDf$QualityScore)), cex.axis = 2, las = 0)
mtext("Cycle",side=1, line=4.7, cex=3)
mtext("(c)",at=-5.7, cex=4)
image.plot(resCycleD, add = TRUE, legend.only = TRUE, legend.width=2,
		col = rampPalette(n = 64, name = "blue2red"), axis.args=list(cex.axis=2), zlim=c(-15,15))

#Dinuc differences
km <- kmeans(resDinucP, 3)$clus
okm <- order(km)
okm=c((0:3)*4+1,(0:3)*4+2,(0:3)*4+3,(0:3)*4+4)

image(1:16, 1:nqs, resDinucD[okm,], col = rampPalette(n = 64, name = "blue2red"), 
		main="SOLiD", cex.main=3, xlab = "", ylab = "Reported Quality Score", cex.lab=3, xaxt = "n", yaxt = "n",zlim=c(-15,15))
axis(side = 1, at = 1:16, labels = udinuc[okm], cex.axis = 2, las = 2)
axis(side = 2, at = 1:nqs, labels = as.character(unique(dinucDf$QualityScore)), cex.axis = 2, las = 0)
mtext("Dinucleotide",side=1, line=4.7, cex=3)
mtext("(d)",at=-1.8, cex=4)
image.plot(resDinucD[okm,], add = TRUE, legend.only = TRUE, legend.width=2,
		col = rampPalette(n = 64, name = "blue2red"), axis.args=list(cex.axis=2), zlim=c(-15,15))

dev.off()

tiff("plots/pval_errc_hg18_cycle_dinuc_WT.tif", height = 600, width = 1300)
#par(fin=c(30,60))
par(mfrow = c(1, 2))
par(mar = c(6.1,6.1,3.6,6.5))

image(1:ncycle, 1:nqs, resCycleP, col = rampPalette(n = 64, name = "blue2red"), 
		main="SOLiD", cex.main=3, xlab = "", ylab = "Reported Quality Score", cex.lab=3, xaxt = "n", yaxt = "n")
axis(side = 1, at = (1:ceiling(max(as.numeric(ucycle))/5))*5, labels = as.character((1:ceiling(max(as.numeric(ucycle))/5))*5), cex.axis = 2, las = 2)
axis(side = 2, at = 1:nqs, labels = as.character(unique(cycleDf$QualityScore)), cex.axis = 2, las = 0)
mtext("Cycle",side=1, line=4.7, cex=3)
mtext("(c)",at=-5.5, cex=4)
image.plot(resCycleP, add = TRUE, legend.only = TRUE, legend.width=2,
		col = rampPalette(n = 64, name = "blue2red"), axis.args=list(cex.axis=2))

#Dinuc differences
km <- kmeans(resDinucP, 3)$clus
okm <- order(km)
okm=c((0:3)*4+1,(0:3)*4+2,(0:3)*4+3,(0:3)*4+4)

image(1:16, 1:nqs, resDinucP[okm,], col = rampPalette(n = 64, name = "blue2red"), 
		main="SOLiD", cex.main=3, xlab = "", ylab = "Reported Quality Score", cex.lab=3, xaxt = "n", yaxt = "n")
axis(side = 1, at = 1:16, labels = udinuc[okm], cex.axis = 2, las = 2)
axis(side = 2, at = 1:nqs, labels = as.character(unique(dinucDf$QualityScore)), cex.axis = 2, las = 0)
mtext("Dinucleotide",side=1, line=4.7, cex=3)
mtext("(d)",at=-1.5, cex=4)
image.plot(resDinucP[okm,], add = TRUE, legend.only = TRUE, legend.width=2,
		col = rampPalette(n = 64, name = "blue2red"), axis.args=list(cex.axis=2))

dev.off()
