# Supplementary material for: Synthetic Spike-in Standards Improve Run-Specific Systematic Error Analysis for DNA and RNA Sequencing
Source: PLoS One. 2012 Jul 31;7(7):e41356. doi: 10.1371/journal.pone.0041356 (PMC3409179; doi:10.1371/journal.pone.0041356)
Supplement: Code S10 — R script to aggregate BQSR data. (R) [file pone.0041356.s015.R]

# Function which provides summary of aggregated stats for dinuc and cycle
# called by makeData.R and makeDataWT.R
# 
# Author: samarov
###############################################################################


biasAgg <- function(x){
	
	x <- subset(x, (x$Cycle > -1) & 
					(x$QualityScore > 4) & (x$Dinuc != "NN"))
	
	## Number of observations at each cycle
	nObs <- x$nObservations
	## Number of mismatches
	nMis <- x$nMismatches
	## Empirical quality score
	qEmp <- -10 * log10(nMis/nObs)
	## Qual score
	qScore <- factor(x$QualityScore)
	## Cycle
	cycle <- factor(x$Cycle)
	## Dinucleotide
	dinuc <- factor(x$Dinuc)
	## flow
	flow <- x$flow
	## rna
	rna <- x$rna
	## method
	method <- x$method
	
	##======================================================
	## Aggrating on cycle
	aggCycle <- aggregate(list(nMismatches = nMis, 
					nObservations = nObs),
			by = list(QualityScore = qScore, Cycle = cycle,
					flow = flow,
					rna = rna,
					method = method),
			FUN = sum, simplify = TRUE)
	
	## -> THIS IS EMPIRICAL QS!!!
	## Qemp for cycle aggregated data set
	aggCycle$Qemp <- -10 * log10(aggCycle$nMis/aggCycle$nObs)
	##--------------------------------------------------------
	
	##======================================================
	## Now aggregating on dinucleotide
	aggDinuc <- aggregate(list(nMismatches = nMis, 
					nObservations = nObs),
			by = list(QualityScore = qScore, Dinuc = dinuc,
					flow = flow,
					rna = rna,
					method = method),
			FUN = sum, simplify = TRUE)
	
	## Qemp for dinuc aggregated data set
	aggDinuc$Qemp <- -10 * log10(aggDinuc$nMis/aggDinuc$nObs)
	##--------------------------------------------------------
	
	return(list(dinucDf = aggDinuc, cycleDf = aggCycle))
	
	
}
