# Supplementary material for: Synthetic Spike-in Standards Improve Run-Specific Systematic Error Analysis for DNA and RNA Sequencing
Source: PLoS One. 2012 Jul 31;7(7):e41356. doi: 10.1371/journal.pone.0041356 (PMC3409179; doi:10.1371/journal.pone.0041356)
Supplement: Supporting Information S1 — concentrations of each of the ERCC spike-ins. (XLSX) [file pone.0041356.s004.xlsx]

## Sheet: for pool users
						Note: all concentrations are de-normalized
Control	Length	GC	Subpool	Concentration in 50 ng/ul SubPool A (ng/ul)	Concentration in 50 ng/ul SubPool B (ng/ul)	Concentration in 50 ng/ul SubPool C (ng/ul)	Copy# Relative Abundances: A	Copy# Relative Abundances: B	Copy# Relative Abundances: C	Log2 Copy# Relative Abundance: A	Log2 Copy# Relative Abundance: B	Log2 Copy# Relative Abundance: C	Pool 78-A SubPool Fractions	Pool 78-B SubPool Fractions	Concentration in 78-A (ng/uL)	Concentration in 78-B (ng/uL)			Pool 78-A SubPool Fractions	Pool 78-B SubPool Fractions
ERCC-00143	784	48.5969	A	14.8371			549414			19.0675			0.3	0.45	6.6767	4.45114		SubPool A	0.3	0.45
ERCC-00025	1994	50.1505	A	23.3346			339736			18.3741			0.3	0.45	10.5006	7.00038		SubPool B	0.45	0.3
ERCC-00120	536	48.3209	A	5.42551			293861			18.1648			0.3	0.45	2.44148	1.62765		SubPool C	0.25	0.25
ERCC-00059	525	48	A	2.7696			153152			17.2246			0.3	0.45	1.24632	0.830879
ERCC-00081	534	48.6891	A	1.36146			74016.6			16.1756			0.3	0.45	0.612656	0.408438		SubPool C remains constant between the two pools ; SubPools B & C have a 1.5 fold change.
ERCC-00083	1023	34.6041	A	0.710673			20167.9			14.2998			0.3	0.45	0.319803	0.213202		Each tube of pools 78-A and 78-B contains 1 ug of RNA (20 uL @ 50 ng/uL)
ERCC-00158	1021	34.0842	A	0.356033			10123.5			13.3054			0.3	0.45	0.160215	0.10681
ERCC-00108	1022	49.0215	A	0.355684			10103.7			13.3026			0.3	0.45	0.160058	0.106705
ERCC-00111	994	47.0825	A	0.182852			5340.46			12.3827			0.3	0.45	0.0822833	0.0548556
ERCC-00012	994	50.9054	A	0.182852			5340.46			12.3827			0.3	0.45	0.0822833	0.0548556
ERCC-00131	771	47.4708	A	0.117869			4438.26			12.1158			0.3	0.45	0.0530413	0.0353608
ERCC-00077	273	32.967	A	0.0416105			4424.93			12.1114			0.3	0.45	0.0187247	0.0124832
ERCC-00067	644	47.205	A	0.070557			3180.68			11.6351			0.3	0.45	0.0317506	0.0211671
ERCC-00062	1023	30.7918	A	0.0888342			2520.99			11.2998			0.3	0.45	0.0399754	0.0266503
ERCC-00162	523	36.1377	A	0.0434404			2411.34			11.2356			0.3	0.45	0.0195482	0.0130321
ERCC-00051	274	34.3066	A	0.0207293			2196.35			11.1009			0.3	0.45	0.0093282	0.0062188
ERCC-00074	522	34.6743	A	0.0217618			1210.29			10.2411			0.3	0.45	0.00979282	0.00652855
ERCC-00069	1137	50.2199	A	0.0399637			1020.4			9.99492			0.3	0.45	0.0179836	0.0119891
ERCC-00168	1024	34.1797	A	0.0221869			629.016			9.29695			0.3	0.45	0.00998409	0.00665606
ERCC-00164	1022	37.0841	A	0.00555757			157.87			7.30259			0.3	0.45	0.00250091	0.00166727
ERCC-00034	1019	49.1658	A	0.00278697			79.4005			6.31108			0.3	0.45	0.00125413	0.00083609
ERCC-00003	1023	32.6491	A	0.00277607			78.7808			6.29977			0.3	0.45	0.00124923	0.00083282
ERCC-00057	1021	49.7551	A	0.00139075			39.5449			5.30542			0.3	0.45	0.000625839	0.000417226
ERCC-00023	273	31.1355	A	0.000325082			34.5698			5.11144			0.3	0.45	0.000146287	9.75246e-05
ERCC-00113	840	50.4762	A	0.000845214			29.2115			4.86846			0.3	0.45	0.000380346	0.000253564
ERCC-00016	844	48.4597	A	0.000841208			28.9352			4.85475			0.3	0.45	0.000378544	0.000252362
ERCC-00099	1350	41.3333	A	0.00105182			22.619			4.49947			0.3	0.45	0.00047332	0.000315546
ERCC-00150	743	46.9717	A	0.000238889			9.33414			3.22252			0.3	0.45	0.0001075	7.16668e-05
ERCC-00035	1130	51.3274	A	0.00031415			8.07095			3.01274			0.3	0.45	0.000141368	9.42451e-05
ERCC-00117	1136	51.1444	A	0.000312491			7.98592			2.99746			0.3	0.45	0.000140621	9.37473e-05
ERCC-00147	1023	36.4614	A	0.000173504			4.9238			2.29977			0.3	0.45	7.80769e-05	5.20513e-05
ERCC-00007	1135	45.5507	A	3.90958e-05			1			0			0.3	0.45	1.75931e-05	1.17287e-05
ERCC-00033	2022	32.7893	B		26.1257			329229			18.3287		0.45	0.3	7.83772	11.7566
ERCC-00042	1023	39.1984	B		12.9096			321550			18.2947		0.45	0.3	3.87289	5.80934
ERCC-00019	644	48.7578	B		5.12677			202847			17.63		0.45	0.3	1.53803	2.30705
ERCC-00137	537	49.5345	B		1.53708			72934.2			16.1543		0.45	0.3	0.461123	0.691685
ERCC-00002	1061	51.3666	B		1.55591			37366.2			15.1894		0.45	0.3	0.466773	0.70016
ERCC-00075	1023	36.2659	B		0.806853			20096.9			14.2947		0.45	0.3	0.242056	0.363084
ERCC-00156	494	48.9879	B		0.208859			10773			13.3951		0.45	0.3	0.0626577	0.0939865
ERCC-00145	1042	44.3378	B		0.39607			9685.33			13.2416		0.45	0.3	0.118821	0.178232
ERCC-00044	1156	50	B		0.357011			7869.26			12.942		0.45	0.3	0.107103	0.160655
ERCC-00085	844	48.5782	B		0.244494			7381.33			12.8497		0.45	0.3	0.0733481	0.110022
ERCC-00148	494	48.583	B		0.104429			5386.49			12.3951		0.45	0.3	0.0313288	0.0469933
ERCC-00078	993	50.0504	B		0.207807			5332.38			12.3806		0.45	0.3	0.0623422	0.0935133
ERCC-00039	740	48.9189	B		0.139427			4800.94			12.2291		0.45	0.3	0.0418282	0.0627423
ERCC-00054	274	37.2263	B		0.0470695			4377.22			12.0958		0.45	0.3	0.0141208	0.0211813
ERCC-00073	603	47.0978	B		0.0855525			3615.14			11.8198		0.45	0.3	0.0256657	0.0384986
ERCC-00171	505	47.7228	B		0.0510774			2577.19			11.3316		0.45	0.3	0.0153232	0.0229848
ERCC-00095	521	37.2361	B		0.0495088			2421.33			11.2416		0.45	0.3	0.0148526	0.022279
ERCC-00097	523	36.1377	B		0.0246597			1201.42			10.2305		0.45	0.3	0.00739792	0.0110969
ERCC-00092	1124	50.1779	B		0.00573712			130.058			7.02301		0.45	0.3	0.00172113	0.0025817
ERCC-00170	1024	33.7891	B		0.00314869			78.3502			6.29186		0.45	0.3	0.000944607	0.00141691
ERCC-00061	1136	50.088	B		0.00283826			63.6624			5.99237		0.45	0.3	0.000851477	0.00127722
ERCC-00076	642	49.6885	B		0.00125555			49.8322			5.63901		0.45	0.3	0.000376666	0.000564999
ERCC-00048	992	47.6815	B		0.00162513			41.7433			5.38347		0.45	0.3	0.000487539	0.000731309
ERCC-00116	1991	50.1256	B		0.00323883			41.4503			5.37331		0.45	0.3	0.00097165	0.00145748
ERCC-00086	1020	32.2549	B		0.00158052			39.4829			5.30316		0.45	0.3	0.000474156	0.000711234
ERCC-00013	808	42.8218	B		0.000997605			31.4599			4.97544		0.45	0.3	0.000299282	0.000448922
ERCC-00040	744	52.6882	B		0.00054171			18.5526			4.21355		0.45	0.3	0.000162513	0.00024377
ERCC-00163	543	46.593	B		0.000371116			17.4149			4.12225		0.45	0.3	0.000111335	0.000167002
ERCC-00109	536	45.5224	B		0.000187982			8.93635			3.15969		0.45	0.3	5.63945e-05	8.45917e-05
ERCC-00028	1130	50.6195	B		0.000356666			8.04253			3.00765		0.45	0.3	0.000107	0.0001605
ERCC-00014	1957	44.2003	B		0.000102972			1.34072			0.423008		0.45	0.3	3.08916e-05	4.63374e-05
ERCC-00128	1133	48.0141	B		4.44652e-05			1			0		0.45	0.3	1.33396e-05	2.00093e-05
ERCC-00134	274	31.3869	C			5.3711			459456			18.8096	0.25	0.25	1.34277	1.34277
ERCC-00084	994	50.3018	C			11.8445			279294			18.0914	0.25	0.25	2.96113	2.96113
ERCC-00104	2023	32.7237	C			23.2792			269714			18.0411	0.25	0.25	5.81979	5.81979
ERCC-00046	522	34.8659	C			5.63862			253182			17.9498	0.25	0.25	1.40966	1.40966
ERCC-00060	523	31.1663	C			1.40696			63053.8			15.9443	0.25	0.25	0.35174	0.35174
ERCC-00160	743	45.6258	C			0.990364			31241.9			14.9312	0.25	0.25	0.247591	0.247591
ERCC-00157	1019	50.1472	C			0.36106			8304.94			13.0198	0.25	0.25	0.090265	0.090265
ERCC-00123	1022	35.6164	C			0.36			8256.25			13.0113	0.25	0.25	0.09	0.09
ERCC-00009	984	47.2561	C			0.186951			4453.12			12.1206	0.25	0.25	0.0467378	0.0467378
ERCC-00138	1022	32.681	C			0.18			4128.13			12.0113	0.25	0.25	0.045	0.045
ERCC-00043	1023	32.7468	C			0.0899121			2060.03			11.0084	0.25	0.25	0.022478	0.022478
ERCC-00144	538	45.539	C			0.0427417			1862.09			10.8627	0.25	0.25	0.0106854	0.0106854
ERCC-00017	1136	51.4085	C			0.0809683			1670.58			10.7061	0.25	0.25	0.0202421	0.0202421
ERCC-00004	523	34.4168	C			0.0219838			985.216			9.9443	0.25	0.25	0.00549594	0.00549594
ERCC-00024	536	46.2687	C			0.0214506			938.005			9.87345	0.25	0.25	0.00536264	0.00536264
ERCC-00126	1119	50.5809	C			0.0410992			860.864			9.74964	0.25	0.25	0.0102748	0.0102748
ERCC-00098	1143	51.4436	C			0.0402362			825.092			9.68841	0.25	0.25	0.0100591	0.0100591
ERCC-00112	1136	47.0951	C			0.0202421			417.646			8.70614	0.25	0.25	0.00506052	0.00506052
ERCC-00058	1136	50.1761	C			0.00506052			104.411			6.70614	0.25	0.25	0.00126513	0.00126513
ERCC-00031	1138	47.8032	C			0.00505163			104.045			6.70106	0.25	0.25	0.00126291	0.00126291
ERCC-00053	1023	31.1828	C			0.00280975			64.3759			6.00845	0.25	0.25	0.000702438	0.000702438
ERCC-00136	1033	41.5295	C			0.00278255			63.1356			5.98038	0.25	0.25	0.000695638	0.000695638
ERCC-00165	872	50	C			0.00164815			44.3008			5.46926	0.25	0.25	0.000412038	0.000412038
ERCC-00071	642	48.4424	C			0.00111931			40.8644			5.35277	0.25	0.25	0.000279826	0.000279826
ERCC-00142	493	49.8986	C			0.000728797			34.649			5.11474	0.25	0.25	0.000182199	0.000182199
ERCC-00022	751	47.2703	C			0.00095685			29.8631			4.90029	0.25	0.25	0.000239212	0.000239212
ERCC-00041	1123	45.325	C			0.00127978			26.7107			4.73935	0.25	0.25	0.000319944	0.000319944
ERCC-00079	644	49.3789	C			0.000557915			20.3055			4.3438	0.25	0.25	0.000139479	0.000139479
ERCC-00154	537	50.0931	C			0.000334541			14.6018			3.86807	0.25	0.25	8.36352e-05	8.36352e-05
ERCC-00096	1107	50.9485	C			0.000162284			3.43605			1.78075	0.25	0.25	4.0571e-05	4.0571e-05
ERCC-00130	1059	45.8924	C			8.48199e-05			1.8773			0.908656	0.25	0.25	2.1205e-05	2.1205e-05
ERCC-00018	1026	43.1774	C			4.3774e-05			1			0	0.25	0.25	1.09435e-05	1.09435e-05
