# Supplementary material for: Synthetic Spike-in Standards Improve Run-Specific Systematic Error Analysis for DNA and RNA Sequencing
Source: PLoS One. 2012 Jul 31;7(7):e41356. doi: 10.1371/journal.pone.0041356 (PMC3409179; doi:10.1371/journal.pone.0041356)
Supplement: Supporting Information S2 — vcf with ERCC spike-in bases excluded from GATK analysis. (VCF) [file pone.0041356.s005.vcf]

##fileformat=VCFv4.1								
##fileDate=20110802								
##source=NIANISCMP99percent								
##reference=ERCCVector.fasta								
##contig=<ID=20,length=86208,assembly=B36,species="ERCCs",taxonomy=x>
##phasing=partial
##INFO=<ID=NS,Number=1,Type=Integer,Description="Number of Samples With Data">
##INFO=<ID=DP,Number=1,Type=Integer,Description="Total Depth">
##INFO=<ID=AF,Number=A,Type=Float,Description="Allele Frequency">
##INFO=<ID=AA,Number=1,Type=String,Description="Ancestral Allele">
##INFO=<ID=DB,Number=0,Type=Flag,Description="dbSNP membership, build 129">
##INFO=<ID=H2,Number=0,Type=Flag,Description="HapMap2 membership">
##FILTER=<ID=q10,Description="Quality below 10">
#CHROM	POS	ID	REF	ALT	QUAL	FILTER	INFO
ERCC-00002	983	.	A	C	.	PASS	.
ERCC-00002	984	.	A	C	.	PASS	.
ERCC-00002	985	.	A	C	.	PASS	.
ERCC-00002	986	.	A	C	.	PASS	.
ERCC-00002	987	.	A	C	.	PASS	.
ERCC-00002	988	.	A	C	.	PASS	.
ERCC-00002	989	.	A	C	.	PASS	.
ERCC-00002	990	.	A	C	.	PASS	.
ERCC-00002	991	.	A	C	.	PASS	.
ERCC-00002	992	.	A	C	.	PASS	.
ERCC-00002	993	.	A	C	.	PASS	.
ERCC-00002	994	.	A	C	.	PASS	.
ERCC-00002	995	.	A	C	.	PASS	.
ERCC-00002	996	.	A	C	.	PASS	.
ERCC-00002	997	.	A	C	.	PASS	.
ERCC-00002	998	.	A	C	.	PASS	.
ERCC-00002	999	.	A	C	.	PASS	.
ERCC-00002	1000	.	A	C	.	PASS	.
ERCC-00002	1001	.	A	C	.	PASS	.
ERCC-00002	1002	.	A	C	.	PASS	.
ERCC-00002	1003	.	A	C	.	PASS	.
ERCC-00002	1004	.	A	C	.	PASS	.
ERCC-00002	1005	.	A	C	.	PASS	.
ERCC-00002	1006	.	A	C	.	PASS	.
ERCC-00002	1007	.	A	C	.	PASS	.
ERCC-00002	1008	.	A	C	.	PASS	.
ERCC-00002	1009	.	A	C	.	PASS	.
ERCC-00002	1010	.	A	C	.	PASS	.
ERCC-00002	1011	.	A	C	.	PASS	.
ERCC-00002	1012	.	A	C	.	PASS	.
ERCC-00002	1013	.	A	C	.	PASS	.
ERCC-00002	1014	.	A	C	.	PASS	.
ERCC-00002	1015	.	A	C	.	PASS	.
ERCC-00002	1016	.	A	C	.	PASS	.
ERCC-00002	1017	.	A	C	.	PASS	.
ERCC-00002	1018	.	A	C	.	PASS	.
ERCC-00002	1019	.	A	C	.	PASS	.
ERCC-00002	1020	.	A	C	.	PASS	.
ERCC-00002	1021	.	A	C	.	PASS	.
ERCC-00002	1022	.	A	C	.	PASS	.
ERCC-00002	1023	.	A	C	.	PASS	.
ERCC-00002	1024	.	A	C	.	PASS	.
ERCC-00002	1025	.	A	C	.	PASS	.
ERCC-00002	1026	.	A	C	.	PASS	.
ERCC-00002	1027	.	A	C	.	PASS	.
ERCC-00002	1028	.	A	C	.	PASS	.
ERCC-00002	1029	.	A	C	.	PASS	.
ERCC-00002	1030	.	A	C	.	PASS	.
ERCC-00002	1031	.	A	C	.	PASS	.
ERCC-00002	1032	.	A	C	.	PASS	.
ERCC-00002	1033	.	A	C	.	PASS	.
ERCC-00002	1038	.	A	C	.	PASS	.
ERCC-00002	1039	.	A	C	.	PASS	.
ERCC-00002	1040	.	A	C	.	PASS	.
ERCC-00002	1041	.	A	C	.	PASS	.
ERCC-00002	1042	.	A	C	.	PASS	.
ERCC-00002	1043	.	A	C	.	PASS	.
ERCC-00002	1044	.	A	C	.	PASS	.
ERCC-00002	1045	.	A	C	.	PASS	.
ERCC-00002	1046	.	A	C	.	PASS	.
ERCC-00002	1047	.	A	C	.	PASS	.
ERCC-00002	1048	.	A	C	.	PASS	.
ERCC-00002	1049	.	A	C	.	PASS	.
ERCC-00002	1050	.	A	C	.	PASS	.
ERCC-00002	1051	.	A	C	.	PASS	.
ERCC-00002	1052	.	A	C	.	PASS	.
ERCC-00002	1053	.	A	C	.	PASS	.
ERCC-00002	1054	.	A	C	.	PASS	.
ERCC-00002	1055	.	A	C	.	PASS	.
ERCC-00002	1056	.	A	C	.	PASS	.
ERCC-00002	1057	.	A	C	.	PASS	.
ERCC-00002	1058	.	A	C	.	PASS	.
ERCC-00002	1059	.	A	C	.	PASS	.
ERCC-00002	1060	.	A	C	.	PASS	.
ERCC-00002	1061	.	A	C	.	PASS	.
ERCC-00003	1	.	A	C	.	PASS	.
ERCC-00003	4	.	A	C	.	PASS	.
ERCC-00003	943	.	A	C	.	PASS	.
ERCC-00003	944	.	A	C	.	PASS	.
ERCC-00003	945	.	A	C	.	PASS	.
ERCC-00003	946	.	A	C	.	PASS	.
ERCC-00003	947	.	A	C	.	PASS	.
ERCC-00003	948	.	A	C	.	PASS	.
ERCC-00003	949	.	A	C	.	PASS	.
ERCC-00003	950	.	A	C	.	PASS	.
ERCC-00003	951	.	A	C	.	PASS	.
ERCC-00003	952	.	A	C	.	PASS	.
ERCC-00003	953	.	A	C	.	PASS	.
ERCC-00003	954	.	A	C	.	PASS	.
ERCC-00003	955	.	A	C	.	PASS	.
ERCC-00003	956	.	A	C	.	PASS	.
ERCC-00003	957	.	A	C	.	PASS	.
ERCC-00003	958	.	A	C	.	PASS	.
ERCC-00003	959	.	A	C	.	PASS	.
ERCC-00003	960	.	A	C	.	PASS	.
ERCC-00003	961	.	A	C	.	PASS	.
ERCC-00003	962	.	A	C	.	PASS	.
ERCC-00003	963	.	A	C	.	PASS	.
ERCC-00003	964	.	A	C	.	PASS	.
ERCC-00003	965	.	A	C	.	PASS	.
ERCC-00003	966	.	A	C	.	PASS	.
ERCC-00003	967	.	A	C	.	PASS	.
ERCC-00003	968	.	A	C	.	PASS	.
ERCC-00003	969	.	A	C	.	PASS	.
ERCC-00003	970	.	A	C	.	PASS	.
ERCC-00003	971	.	A	C	.	PASS	.
ERCC-00003	972	.	A	C	.	PASS	.
ERCC-00003	973	.	A	C	.	PASS	.
ERCC-00003	974	.	A	C	.	PASS	.
ERCC-00003	975	.	A	C	.	PASS	.
ERCC-00003	976	.	A	C	.	PASS	.
ERCC-00003	977	.	A	C	.	PASS	.
ERCC-00003	978	.	A	C	.	PASS	.
ERCC-00003	979	.	A	C	.	PASS	.
ERCC-00003	980	.	A	C	.	PASS	.
ERCC-00003	981	.	A	C	.	PASS	.
ERCC-00003	982	.	A	C	.	PASS	.
ERCC-00003	983	.	A	C	.	PASS	.
ERCC-00003	984	.	A	C	.	PASS	.
ERCC-00003	985	.	A	C	.	PASS	.
ERCC-00003	986	.	A	C	.	PASS	.
ERCC-00003	987	.	A	C	.	PASS	.
ERCC-00003	988	.	A	C	.	PASS	.
ERCC-00003	989	.	A	C	.	PASS	.
ERCC-00003	990	.	A	C	.	PASS	.
ERCC-00003	991	.	A	C	.	PASS	.
ERCC-00003	992	.	A	C	.	PASS	.
ERCC-00003	993	.	A	C	.	PASS	.
ERCC-00003	1000	.	A	C	.	PASS	.
ERCC-00003	1001	.	A	C	.	PASS	.
ERCC-00003	1002	.	A	C	.	PASS	.
ERCC-00003	1003	.	A	C	.	PASS	.
ERCC-00003	1004	.	A	C	.	PASS	.
ERCC-00003	1005	.	A	C	.	PASS	.
ERCC-00003	1006	.	A	C	.	PASS	.
ERCC-00003	1007	.	A	C	.	PASS	.
ERCC-00003	1008	.	A	C	.	PASS	.
ERCC-00003	1009	.	A	C	.	PASS	.
ERCC-00003	1010	.	A	C	.	PASS	.
ERCC-00003	1011	.	A	C	.	PASS	.
ERCC-00003	1012	.	A	C	.	PASS	.
ERCC-00003	1013	.	A	C	.	PASS	.
ERCC-00003	1014	.	A	C	.	PASS	.
ERCC-00003	1015	.	A	C	.	PASS	.
ERCC-00003	1016	.	A	C	.	PASS	.
ERCC-00003	1017	.	A	C	.	PASS	.
ERCC-00003	1018	.	A	C	.	PASS	.
ERCC-00003	1019	.	A	C	.	PASS	.
ERCC-00003	1020	.	A	C	.	PASS	.
ERCC-00003	1021	.	A	C	.	PASS	.
ERCC-00003	1022	.	A	C	.	PASS	.
ERCC-00003	1023	.	A	C	.	PASS	.
ERCC-00004	153	.	A	C	.	PASS	.
ERCC-00004	447	.	A	C	.	PASS	.
ERCC-00004	448	.	A	C	.	PASS	.
ERCC-00004	449	.	A	C	.	PASS	.
ERCC-00004	450	.	A	C	.	PASS	.
ERCC-00004	451	.	A	C	.	PASS	.
ERCC-00004	452	.	A	C	.	PASS	.
ERCC-00004	453	.	A	C	.	PASS	.
ERCC-00004	454	.	A	C	.	PASS	.
ERCC-00004	455	.	A	C	.	PASS	.
ERCC-00004	456	.	A	C	.	PASS	.
ERCC-00004	457	.	A	C	.	PASS	.
ERCC-00004	458	.	A	C	.	PASS	.
ERCC-00004	459	.	A	C	.	PASS	.
ERCC-00004	460	.	A	C	.	PASS	.
ERCC-00004	461	.	A	C	.	PASS	.
ERCC-00004	462	.	A	C	.	PASS	.
ERCC-00004	463	.	A	C	.	PASS	.
ERCC-00004	464	.	A	C	.	PASS	.
ERCC-00004	465	.	A	C	.	PASS	.
ERCC-00004	466	.	A	C	.	PASS	.
ERCC-00004	467	.	A	C	.	PASS	.
ERCC-00004	468	.	A	C	.	PASS	.
ERCC-00004	469	.	A	C	.	PASS	.
ERCC-00004	470	.	A	C	.	PASS	.
ERCC-00004	471	.	A	C	.	PASS	.
ERCC-00004	472	.	A	C	.	PASS	.
ERCC-00004	473	.	A	C	.	PASS	.
ERCC-00004	474	.	A	C	.	PASS	.
ERCC-00004	475	.	A	C	.	PASS	.
ERCC-00004	476	.	A	C	.	PASS	.
ERCC-00004	477	.	A	C	.	PASS	.
ERCC-00004	478	.	A	C	.	PASS	.
ERCC-00004	479	.	A	C	.	PASS	.
ERCC-00004	480	.	A	C	.	PASS	.
ERCC-00004	481	.	A	C	.	PASS	.
ERCC-00004	482	.	A	C	.	PASS	.
ERCC-00004	483	.	A	C	.	PASS	.
ERCC-00004	484	.	A	C	.	PASS	.
ERCC-00004	485	.	A	C	.	PASS	.
ERCC-00004	486	.	A	C	.	PASS	.
ERCC-00004	487	.	A	C	.	PASS	.
ERCC-00004	488	.	A	C	.	PASS	.
ERCC-00004	489	.	A	C	.	PASS	.
ERCC-00004	490	.	A	C	.	PASS	.
ERCC-00004	491	.	A	C	.	PASS	.
ERCC-00004	492	.	A	C	.	PASS	.
ERCC-00004	493	.	A	C	.	PASS	.
ERCC-00004	494	.	A	C	.	PASS	.
ERCC-00004	495	.	A	C	.	PASS	.
ERCC-00004	496	.	A	C	.	PASS	.
ERCC-00004	497	.	A	C	.	PASS	.
ERCC-00004	500	.	A	C	.	PASS	.
ERCC-00004	501	.	A	C	.	PASS	.
ERCC-00004	502	.	A	C	.	PASS	.
ERCC-00004	503	.	A	C	.	PASS	.
ERCC-00004	504	.	A	C	.	PASS	.
ERCC-00004	505	.	A	C	.	PASS	.
ERCC-00004	506	.	A	C	.	PASS	.
ERCC-00004	507	.	A	C	.	PASS	.
ERCC-00004	508	.	A	C	.	PASS	.
ERCC-00004	509	.	A	C	.	PASS	.
ERCC-00004	510	.	A	C	.	PASS	.
ERCC-00004	511	.	A	C	.	PASS	.
ERCC-00004	512	.	A	C	.	PASS	.
ERCC-00004	513	.	A	C	.	PASS	.
ERCC-00004	514	.	A	C	.	PASS	.
ERCC-00004	515	.	A	C	.	PASS	.
ERCC-00004	516	.	A	C	.	PASS	.
ERCC-00004	517	.	A	C	.	PASS	.
ERCC-00004	518	.	A	C	.	PASS	.
ERCC-00004	519	.	A	C	.	PASS	.
ERCC-00004	520	.	A	C	.	PASS	.
ERCC-00004	521	.	A	C	.	PASS	.
ERCC-00004	522	.	A	C	.	PASS	.
ERCC-00004	523	.	A	C	.	PASS	.
ERCC-00007	1051	.	A	C	.	PASS	.
ERCC-00007	1052	.	A	C	.	PASS	.
ERCC-00007	1053	.	A	C	.	PASS	.
ERCC-00007	1054	.	A	C	.	PASS	.
ERCC-00007	1055	.	A	C	.	PASS	.
ERCC-00007	1056	.	A	C	.	PASS	.
ERCC-00007	1057	.	A	C	.	PASS	.
ERCC-00007	1058	.	A	C	.	PASS	.
ERCC-00007	1059	.	A	C	.	PASS	.
ERCC-00007	1060	.	A	C	.	PASS	.
ERCC-00007	1061	.	A	C	.	PASS	.
ERCC-00007	1062	.	A	C	.	PASS	.
ERCC-00007	1063	.	A	C	.	PASS	.
ERCC-00007	1064	.	A	C	.	PASS	.
ERCC-00007	1065	.	A	C	.	PASS	.
ERCC-00007	1066	.	A	C	.	PASS	.
ERCC-00007	1067	.	A	C	.	PASS	.
ERCC-00007	1068	.	A	C	.	PASS	.
ERCC-00007	1069	.	A	C	.	PASS	.
ERCC-00007	1070	.	A	C	.	PASS	.
ERCC-00007	1071	.	A	C	.	PASS	.
ERCC-00007	1072	.	A	C	.	PASS	.
ERCC-00007	1073	.	A	C	.	PASS	.
ERCC-00007	1074	.	A	C	.	PASS	.
ERCC-00007	1075	.	A	C	.	PASS	.
ERCC-00007	1076	.	A	C	.	PASS	.
ERCC-00007	1077	.	A	C	.	PASS	.
ERCC-00007	1078	.	A	C	.	PASS	.
ERCC-00007	1079	.	A	C	.	PASS	.
ERCC-00007	1080	.	A	C	.	PASS	.
ERCC-00007	1081	.	A	C	.	PASS	.
ERCC-00007	1082	.	A	C	.	PASS	.
ERCC-00007	1083	.	A	C	.	PASS	.
ERCC-00007	1084	.	A	C	.	PASS	.
ERCC-00007	1085	.	A	C	.	PASS	.
ERCC-00007	1086	.	A	C	.	PASS	.
ERCC-00007	1087	.	A	C	.	PASS	.
ERCC-00007	1088	.	A	C	.	PASS	.
ERCC-00007	1089	.	A	C	.	PASS	.
ERCC-00007	1090	.	A	C	.	PASS	.
ERCC-00007	1091	.	A	C	.	PASS	.
ERCC-00007	1092	.	A	C	.	PASS	.
ERCC-00007	1093	.	A	C	.	PASS	.
ERCC-00007	1094	.	A	C	.	PASS	.
ERCC-00007	1095	.	A	C	.	PASS	.
ERCC-00007	1096	.	A	C	.	PASS	.
ERCC-00007	1097	.	A	C	.	PASS	.
ERCC-00007	1098	.	A	C	.	PASS	.
ERCC-00007	1099	.	A	C	.	PASS	.
ERCC-00007	1100	.	A	C	.	PASS	.
ERCC-00007	1101	.	A	C	.	PASS	.
ERCC-00007	1112	.	A	C	.	PASS	.
ERCC-00007	1113	.	A	C	.	PASS	.
ERCC-00007	1114	.	A	C	.	PASS	.
ERCC-00007	1115	.	A	C	.	PASS	.
ERCC-00007	1116	.	A	C	.	PASS	.
ERCC-00007	1117	.	A	C	.	PASS	.
ERCC-00007	1118	.	A	C	.	PASS	.
ERCC-00007	1119	.	A	C	.	PASS	.
ERCC-00007	1120	.	A	C	.	PASS	.
ERCC-00007	1121	.	A	C	.	PASS	.
ERCC-00007	1122	.	A	C	.	PASS	.
ERCC-00007	1123	.	A	C	.	PASS	.
ERCC-00007	1124	.	A	C	.	PASS	.
ERCC-00007	1125	.	A	C	.	PASS	.
ERCC-00007	1126	.	A	C	.	PASS	.
ERCC-00007	1127	.	A	C	.	PASS	.
ERCC-00007	1128	.	A	C	.	PASS	.
ERCC-00007	1129	.	A	C	.	PASS	.
ERCC-00007	1130	.	A	C	.	PASS	.
ERCC-00007	1131	.	A	C	.	PASS	.
ERCC-00007	1132	.	A	C	.	PASS	.
ERCC-00007	1133	.	A	C	.	PASS	.
ERCC-00007	1134	.	A	C	.	PASS	.
ERCC-00007	1135	.	A	C	.	PASS	.
ERCC-00009	909	.	A	C	.	PASS	.
ERCC-00009	910	.	A	C	.	PASS	.
ERCC-00009	911	.	A	C	.	PASS	.
ERCC-00009	912	.	A	C	.	PASS	.
ERCC-00009	913	.	A	C	.	PASS	.
ERCC-00009	914	.	A	C	.	PASS	.
ERCC-00009	915	.	A	C	.	PASS	.
ERCC-00009	916	.	A	C	.	PASS	.
ERCC-00009	917	.	A	C	.	PASS	.
ERCC-00009	918	.	A	C	.	PASS	.
ERCC-00009	919	.	A	C	.	PASS	.
ERCC-00009	920	.	A	C	.	PASS	.
ERCC-00009	921	.	A	C	.	PASS	.
ERCC-00009	922	.	A	C	.	PASS	.
ERCC-00009	923	.	A	C	.	PASS	.
ERCC-00009	924	.	A	C	.	PASS	.
ERCC-00009	925	.	A	C	.	PASS	.
ERCC-00009	926	.	A	C	.	PASS	.
ERCC-00009	927	.	A	C	.	PASS	.
ERCC-00009	928	.	A	C	.	PASS	.
ERCC-00009	929	.	A	C	.	PASS	.
ERCC-00009	930	.	A	C	.	PASS	.
ERCC-00009	931	.	A	C	.	PASS	.
ERCC-00009	932	.	A	C	.	PASS	.
ERCC-00009	933	.	A	C	.	PASS	.
ERCC-00009	934	.	A	C	.	PASS	.
ERCC-00009	935	.	A	C	.	PASS	.
ERCC-00009	936	.	A	C	.	PASS	.
ERCC-00009	937	.	A	C	.	PASS	.
ERCC-00009	938	.	A	C	.	PASS	.
ERCC-00009	939	.	A	C	.	PASS	.
ERCC-00009	940	.	A	C	.	PASS	.
ERCC-00009	941	.	A	C	.	PASS	.
ERCC-00009	942	.	A	C	.	PASS	.
ERCC-00009	943	.	A	C	.	PASS	.
ERCC-00009	944	.	A	C	.	PASS	.
ERCC-00009	945	.	A	C	.	PASS	.
ERCC-00009	946	.	A	C	.	PASS	.
ERCC-00009	947	.	A	C	.	PASS	.
ERCC-00009	948	.	A	C	.	PASS	.
ERCC-00009	949	.	A	C	.	PASS	.
ERCC-00009	950	.	A	C	.	PASS	.
ERCC-00009	951	.	A	C	.	PASS	.
ERCC-00009	952	.	A	C	.	PASS	.
ERCC-00009	953	.	A	C	.	PASS	.
ERCC-00009	954	.	A	C	.	PASS	.
ERCC-00009	955	.	A	C	.	PASS	.
ERCC-00009	956	.	A	C	.	PASS	.
ERCC-00009	957	.	A	C	.	PASS	.
ERCC-00009	958	.	A	C	.	PASS	.
ERCC-00009	959	.	A	C	.	PASS	.
ERCC-00009	961	.	A	C	.	PASS	.
ERCC-00009	962	.	A	C	.	PASS	.
ERCC-00009	963	.	A	C	.	PASS	.
ERCC-00009	964	.	A	C	.	PASS	.
ERCC-00009	965	.	A	C	.	PASS	.
ERCC-00009	966	.	A	C	.	PASS	.
ERCC-00009	967	.	A	C	.	PASS	.
ERCC-00009	968	.	A	C	.	PASS	.
ERCC-00009	969	.	A	C	.	PASS	.
ERCC-00009	970	.	A	C	.	PASS	.
ERCC-00009	971	.	A	C	.	PASS	.
ERCC-00009	972	.	A	C	.	PASS	.
ERCC-00009	973	.	A	C	.	PASS	.
ERCC-00009	974	.	A	C	.	PASS	.
ERCC-00009	975	.	A	C	.	PASS	.
ERCC-00009	976	.	A	C	.	PASS	.
ERCC-00009	977	.	A	C	.	PASS	.
ERCC-00009	978	.	A	C	.	PASS	.
ERCC-00009	979	.	A	C	.	PASS	.
ERCC-00009	980	.	A	C	.	PASS	.
ERCC-00009	981	.	A	C	.	PASS	.
ERCC-00009	982	.	A	C	.	PASS	.
ERCC-00009	983	.	A	C	.	PASS	.
ERCC-00009	984	.	A	C	.	PASS	.
ERCC-00012	916	.	A	C	.	PASS	.
ERCC-00012	917	.	A	C	.	PASS	.
ERCC-00012	918	.	A	C	.	PASS	.
ERCC-00012	919	.	A	C	.	PASS	.
ERCC-00012	920	.	A	C	.	PASS	.
ERCC-00012	921	.	A	C	.	PASS	.
ERCC-00012	922	.	A	C	.	PASS	.
ERCC-00012	923	.	A	C	.	PASS	.
ERCC-00012	924	.	A	C	.	PASS	.
ERCC-00012	925	.	A	C	.	PASS	.
ERCC-00012	926	.	A	C	.	PASS	.
ERCC-00012	927	.	A	C	.	PASS	.
ERCC-00012	928	.	A	C	.	PASS	.
ERCC-00012	929	.	A	C	.	PASS	.
ERCC-00012	930	.	A	C	.	PASS	.
ERCC-00012	931	.	A	C	.	PASS	.
ERCC-00012	932	.	A	C	.	PASS	.
ERCC-00012	933	.	A	C	.	PASS	.
ERCC-00012	934	.	A	C	.	PASS	.
ERCC-00012	935	.	A	C	.	PASS	.
ERCC-00012	936	.	A	C	.	PASS	.
ERCC-00012	937	.	A	C	.	PASS	.
ERCC-00012	938	.	A	C	.	PASS	.
ERCC-00012	939	.	A	C	.	PASS	.
ERCC-00012	940	.	A	C	.	PASS	.
ERCC-00012	941	.	A	C	.	PASS	.
ERCC-00012	942	.	A	C	.	PASS	.
ERCC-00012	943	.	A	C	.	PASS	.
ERCC-00012	944	.	A	C	.	PASS	.
ERCC-00012	945	.	A	C	.	PASS	.
ERCC-00012	946	.	A	C	.	PASS	.
ERCC-00012	947	.	A	C	.	PASS	.
ERCC-00012	948	.	A	C	.	PASS	.
ERCC-00012	949	.	A	C	.	PASS	.
ERCC-00012	950	.	A	C	.	PASS	.
ERCC-00012	951	.	A	C	.	PASS	.
ERCC-00012	952	.	A	C	.	PASS	.
ERCC-00012	953	.	A	C	.	PASS	.
ERCC-00012	954	.	A	C	.	PASS	.
ERCC-00012	955	.	A	C	.	PASS	.
ERCC-00012	956	.	A	C	.	PASS	.
ERCC-00012	957	.	A	C	.	PASS	.
ERCC-00012	958	.	A	C	.	PASS	.
ERCC-00012	959	.	A	C	.	PASS	.
ERCC-00012	960	.	A	C	.	PASS	.
ERCC-00012	961	.	A	C	.	PASS	.
ERCC-00012	962	.	A	C	.	PASS	.
ERCC-00012	963	.	A	C	.	PASS	.
ERCC-00012	964	.	A	C	.	PASS	.
ERCC-00012	965	.	A	C	.	PASS	.
ERCC-00012	966	.	A	C	.	PASS	.
ERCC-00012	971	.	A	C	.	PASS	.
ERCC-00012	972	.	A	C	.	PASS	.
ERCC-00012	973	.	A	C	.	PASS	.
ERCC-00012	974	.	A	C	.	PASS	.
ERCC-00012	975	.	A	C	.	PASS	.
ERCC-00012	976	.	A	C	.	PASS	.
ERCC-00012	977	.	A	C	.	PASS	.
ERCC-00012	978	.	A	C	.	PASS	.
ERCC-00012	979	.	A	C	.	PASS	.
ERCC-00012	980	.	A	C	.	PASS	.
ERCC-00012	981	.	A	C	.	PASS	.
ERCC-00012	982	.	A	C	.	PASS	.
ERCC-00012	983	.	A	C	.	PASS	.
ERCC-00012	984	.	A	C	.	PASS	.
ERCC-00012	985	.	A	C	.	PASS	.
ERCC-00012	986	.	A	C	.	PASS	.
ERCC-00012	987	.	A	C	.	PASS	.
ERCC-00012	988	.	A	C	.	PASS	.
ERCC-00012	989	.	A	C	.	PASS	.
ERCC-00012	990	.	A	C	.	PASS	.
ERCC-00012	991	.	A	C	.	PASS	.
ERCC-00012	992	.	A	C	.	PASS	.
ERCC-00012	993	.	A	C	.	PASS	.
ERCC-00012	994	.	A	C	.	PASS	.
ERCC-00013	729	.	A	C	.	PASS	.
ERCC-00013	730	.	A	C	.	PASS	.
ERCC-00013	731	.	A	C	.	PASS	.
ERCC-00013	732	.	A	C	.	PASS	.
ERCC-00013	733	.	A	C	.	PASS	.
ERCC-00013	734	.	A	C	.	PASS	.
ERCC-00013	735	.	A	C	.	PASS	.
ERCC-00013	736	.	A	C	.	PASS	.
ERCC-00013	737	.	A	C	.	PASS	.
ERCC-00013	738	.	A	C	.	PASS	.
ERCC-00013	739	.	A	C	.	PASS	.
ERCC-00013	740	.	A	C	.	PASS	.
ERCC-00013	741	.	A	C	.	PASS	.
ERCC-00013	742	.	A	C	.	PASS	.
ERCC-00013	743	.	A	C	.	PASS	.
ERCC-00013	744	.	A	C	.	PASS	.
ERCC-00013	745	.	A	C	.	PASS	.
ERCC-00013	746	.	A	C	.	PASS	.
ERCC-00013	747	.	A	C	.	PASS	.
ERCC-00013	748	.	A	C	.	PASS	.
ERCC-00013	749	.	A	C	.	PASS	.
ERCC-00013	750	.	A	C	.	PASS	.
ERCC-00013	751	.	A	C	.	PASS	.
ERCC-00013	752	.	A	C	.	PASS	.
ERCC-00013	753	.	A	C	.	PASS	.
ERCC-00013	754	.	A	C	.	PASS	.
ERCC-00013	755	.	A	C	.	PASS	.
ERCC-00013	756	.	A	C	.	PASS	.
ERCC-00013	757	.	A	C	.	PASS	.
ERCC-00013	758	.	A	C	.	PASS	.
ERCC-00013	759	.	A	C	.	PASS	.
ERCC-00013	760	.	A	C	.	PASS	.
ERCC-00013	761	.	A	C	.	PASS	.
ERCC-00013	762	.	A	C	.	PASS	.
ERCC-00013	763	.	A	C	.	PASS	.
ERCC-00013	764	.	A	C	.	PASS	.
ERCC-00013	765	.	A	C	.	PASS	.
ERCC-00013	766	.	A	C	.	PASS	.
ERCC-00013	767	.	A	C	.	PASS	.
ERCC-00013	768	.	A	C	.	PASS	.
ERCC-00013	769	.	A	C	.	PASS	.
ERCC-00013	770	.	A	C	.	PASS	.
ERCC-00013	771	.	A	C	.	PASS	.
ERCC-00013	772	.	A	C	.	PASS	.
ERCC-00013	773	.	A	C	.	PASS	.
ERCC-00013	774	.	A	C	.	PASS	.
ERCC-00013	775	.	A	C	.	PASS	.
ERCC-00013	776	.	A	C	.	PASS	.
ERCC-00013	777	.	A	C	.	PASS	.
ERCC-00013	778	.	A	C	.	PASS	.
ERCC-00013	779	.	A	C	.	PASS	.
ERCC-00013	785	.	A	C	.	PASS	.
ERCC-00013	786	.	A	C	.	PASS	.
ERCC-00013	787	.	A	C	.	PASS	.
ERCC-00013	788	.	A	C	.	PASS	.
ERCC-00013	789	.	A	C	.	PASS	.
ERCC-00013	790	.	A	C	.	PASS	.
ERCC-00013	791	.	A	C	.	PASS	.
ERCC-00013	792	.	A	C	.	PASS	.
ERCC-00013	793	.	A	C	.	PASS	.
ERCC-00013	794	.	A	C	.	PASS	.
ERCC-00013	795	.	A	C	.	PASS	.
ERCC-00013	796	.	A	C	.	PASS	.
ERCC-00013	797	.	A	C	.	PASS	.
ERCC-00013	798	.	A	C	.	PASS	.
ERCC-00013	799	.	A	C	.	PASS	.
ERCC-00013	800	.	A	C	.	PASS	.
ERCC-00013	801	.	A	C	.	PASS	.
ERCC-00013	802	.	A	C	.	PASS	.
ERCC-00013	803	.	A	C	.	PASS	.
ERCC-00013	804	.	A	C	.	PASS	.
ERCC-00013	805	.	A	C	.	PASS	.
ERCC-00013	806	.	A	C	.	PASS	.
ERCC-00013	807	.	A	C	.	PASS	.
ERCC-00013	808	.	A	C	.	PASS	.
ERCC-00014	1858	.	A	C	.	PASS	.
ERCC-00014	1859	.	A	C	.	PASS	.
ERCC-00014	1860	.	A	C	.	PASS	.
ERCC-00014	1861	.	A	C	.	PASS	.
ERCC-00014	1862	.	A	C	.	PASS	.
ERCC-00014	1863	.	A	C	.	PASS	.
ERCC-00014	1864	.	A	C	.	PASS	.
ERCC-00014	1865	.	A	C	.	PASS	.
ERCC-00014	1866	.	A	C	.	PASS	.
ERCC-00014	1867	.	A	C	.	PASS	.
ERCC-00014	1868	.	A	C	.	PASS	.
ERCC-00014	1869	.	A	C	.	PASS	.
ERCC-00014	1870	.	A	C	.	PASS	.
ERCC-00014	1871	.	A	C	.	PASS	.
ERCC-00014	1872	.	A	C	.	PASS	.
ERCC-00014	1873	.	A	C	.	PASS	.
ERCC-00014	1874	.	A	C	.	PASS	.
ERCC-00014	1875	.	A	C	.	PASS	.
ERCC-00014	1876	.	A	C	.	PASS	.
ERCC-00014	1877	.	A	C	.	PASS	.
ERCC-00014	1878	.	A	C	.	PASS	.
ERCC-00014	1879	.	A	C	.	PASS	.
ERCC-00014	1880	.	A	C	.	PASS	.
ERCC-00014	1881	.	A	C	.	PASS	.
ERCC-00014	1882	.	A	C	.	PASS	.
ERCC-00014	1883	.	A	C	.	PASS	.
ERCC-00014	1884	.	A	C	.	PASS	.
ERCC-00014	1885	.	A	C	.	PASS	.
ERCC-00014	1886	.	A	C	.	PASS	.
ERCC-00014	1887	.	A	C	.	PASS	.
ERCC-00014	1888	.	A	C	.	PASS	.
ERCC-00014	1889	.	A	C	.	PASS	.
ERCC-00014	1890	.	A	C	.	PASS	.
ERCC-00014	1891	.	A	C	.	PASS	.
ERCC-00014	1892	.	A	C	.	PASS	.
ERCC-00014	1893	.	A	C	.	PASS	.
ERCC-00014	1894	.	A	C	.	PASS	.
ERCC-00014	1895	.	A	C	.	PASS	.
ERCC-00014	1896	.	A	C	.	PASS	.
ERCC-00014	1897	.	A	C	.	PASS	.
ERCC-00014	1898	.	A	C	.	PASS	.
ERCC-00014	1899	.	A	C	.	PASS	.
ERCC-00014	1900	.	A	C	.	PASS	.
ERCC-00014	1901	.	A	C	.	PASS	.
ERCC-00014	1902	.	A	C	.	PASS	.
ERCC-00014	1903	.	A	C	.	PASS	.
ERCC-00014	1904	.	A	C	.	PASS	.
ERCC-00014	1905	.	A	C	.	PASS	.
ERCC-00014	1906	.	A	C	.	PASS	.
ERCC-00014	1907	.	A	C	.	PASS	.
ERCC-00014	1908	.	A	C	.	PASS	.
ERCC-00014	1938	.	A	C	.	PASS	.
ERCC-00014	1939	.	A	C	.	PASS	.
ERCC-00014	1940	.	A	C	.	PASS	.
ERCC-00014	1941	.	A	C	.	PASS	.
ERCC-00014	1942	.	A	C	.	PASS	.
ERCC-00014	1943	.	A	C	.	PASS	.
ERCC-00014	1944	.	A	C	.	PASS	.
ERCC-00014	1945	.	A	C	.	PASS	.
ERCC-00014	1946	.	A	C	.	PASS	.
ERCC-00014	1947	.	A	C	.	PASS	.
ERCC-00014	1948	.	A	C	.	PASS	.
ERCC-00014	1949	.	A	C	.	PASS	.
ERCC-00014	1950	.	A	C	.	PASS	.
ERCC-00014	1951	.	A	C	.	PASS	.
ERCC-00014	1952	.	A	C	.	PASS	.
ERCC-00014	1953	.	A	C	.	PASS	.
ERCC-00014	1954	.	A	C	.	PASS	.
ERCC-00014	1955	.	A	C	.	PASS	.
ERCC-00014	1956	.	A	C	.	PASS	.
ERCC-00014	1957	.	A	C	.	PASS	.
ERCC-00016	280	.	A	C	.	PASS	.
ERCC-00016	758	.	A	C	.	PASS	.
ERCC-00016	759	.	A	C	.	PASS	.
ERCC-00016	760	.	A	C	.	PASS	.
ERCC-00016	761	.	A	C	.	PASS	.
ERCC-00016	762	.	A	C	.	PASS	.
ERCC-00016	763	.	A	C	.	PASS	.
ERCC-00016	764	.	A	C	.	PASS	.
ERCC-00016	765	.	A	C	.	PASS	.
ERCC-00016	766	.	A	C	.	PASS	.
ERCC-00016	767	.	A	C	.	PASS	.
ERCC-00016	768	.	A	C	.	PASS	.
ERCC-00016	769	.	A	C	.	PASS	.
ERCC-00016	770	.	A	C	.	PASS	.
ERCC-00016	771	.	A	C	.	PASS	.
ERCC-00016	772	.	A	C	.	PASS	.
ERCC-00016	773	.	A	C	.	PASS	.
ERCC-00016	774	.	A	C	.	PASS	.
ERCC-00016	775	.	A	C	.	PASS	.
ERCC-00016	776	.	A	C	.	PASS	.
ERCC-00016	777	.	A	C	.	PASS	.
ERCC-00016	778	.	A	C	.	PASS	.
ERCC-00016	779	.	A	C	.	PASS	.
ERCC-00016	780	.	A	C	.	PASS	.
ERCC-00016	781	.	A	C	.	PASS	.
ERCC-00016	782	.	A	C	.	PASS	.
ERCC-00016	783	.	A	C	.	PASS	.
ERCC-00016	784	.	A	C	.	PASS	.
ERCC-00016	785	.	A	C	.	PASS	.
ERCC-00016	786	.	A	C	.	PASS	.
ERCC-00016	787	.	A	C	.	PASS	.
ERCC-00016	788	.	A	C	.	PASS	.
ERCC-00016	789	.	A	C	.	PASS	.
ERCC-00016	790	.	A	C	.	PASS	.
ERCC-00016	791	.	A	C	.	PASS	.
ERCC-00016	792	.	A	C	.	PASS	.
ERCC-00016	793	.	A	C	.	PASS	.
ERCC-00016	794	.	A	C	.	PASS	.
ERCC-00016	795	.	A	C	.	PASS	.
ERCC-00016	796	.	A	C	.	PASS	.
ERCC-00016	797	.	A	C	.	PASS	.
ERCC-00016	798	.	A	C	.	PASS	.
ERCC-00016	799	.	A	C	.	PASS	.
ERCC-00016	800	.	A	C	.	PASS	.
ERCC-00016	801	.	A	C	.	PASS	.
ERCC-00016	802	.	A	C	.	PASS	.
ERCC-00016	803	.	A	C	.	PASS	.
ERCC-00016	804	.	A	C	.	PASS	.
ERCC-00016	805	.	A	C	.	PASS	.
ERCC-00016	806	.	A	C	.	PASS	.
ERCC-00016	807	.	A	C	.	PASS	.
ERCC-00016	808	.	A	C	.	PASS	.
ERCC-00016	821	.	A	C	.	PASS	.
ERCC-00016	822	.	A	C	.	PASS	.
ERCC-00016	823	.	A	C	.	PASS	.
ERCC-00016	824	.	A	C	.	PASS	.
ERCC-00016	825	.	A	C	.	PASS	.
ERCC-00016	826	.	A	C	.	PASS	.
ERCC-00016	827	.	A	C	.	PASS	.
ERCC-00016	828	.	A	C	.	PASS	.
ERCC-00016	829	.	A	C	.	PASS	.
ERCC-00016	830	.	A	C	.	PASS	.
ERCC-00016	831	.	A	C	.	PASS	.
ERCC-00016	832	.	A	C	.	PASS	.
ERCC-00016	833	.	A	C	.	PASS	.
ERCC-00016	834	.	A	C	.	PASS	.
ERCC-00016	835	.	A	C	.	PASS	.
ERCC-00016	836	.	A	C	.	PASS	.
ERCC-00016	837	.	A	C	.	PASS	.
ERCC-00016	838	.	A	C	.	PASS	.
ERCC-00016	839	.	A	C	.	PASS	.
ERCC-00016	840	.	A	C	.	PASS	.
ERCC-00016	841	.	A	C	.	PASS	.
ERCC-00016	842	.	A	C	.	PASS	.
ERCC-00016	843	.	A	C	.	PASS	.
ERCC-00016	844	.	A	C	.	PASS	.
ERCC-00017	1058	.	A	C	.	PASS	.
ERCC-00017	1059	.	A	C	.	PASS	.
ERCC-00017	1060	.	A	C	.	PASS	.
ERCC-00017	1061	.	A	C	.	PASS	.
ERCC-00017	1062	.	A	C	.	PASS	.
ERCC-00017	1063	.	A	C	.	PASS	.
ERCC-00017	1064	.	A	C	.	PASS	.
ERCC-00017	1065	.	A	C	.	PASS	.
ERCC-00017	1066	.	A	C	.	PASS	.
ERCC-00017	1067	.	A	C	.	PASS	.
ERCC-00017	1068	.	A	C	.	PASS	.
ERCC-00017	1069	.	A	C	.	PASS	.
ERCC-00017	1070	.	A	C	.	PASS	.
ERCC-00017	1071	.	A	C	.	PASS	.
ERCC-00017	1072	.	A	C	.	PASS	.
ERCC-00017	1073	.	A	C	.	PASS	.
ERCC-00017	1074	.	A	C	.	PASS	.
ERCC-00017	1075	.	A	C	.	PASS	.
ERCC-00017	1076	.	A	C	.	PASS	.
ERCC-00017	1077	.	A	C	.	PASS	.
ERCC-00017	1078	.	A	C	.	PASS	.
ERCC-00017	1079	.	A	C	.	PASS	.
ERCC-00017	1080	.	A	C	.	PASS	.
ERCC-00017	1081	.	A	C	.	PASS	.
ERCC-00017	1082	.	A	C	.	PASS	.
ERCC-00017	1083	.	A	C	.	PASS	.
ERCC-00017	1084	.	A	C	.	PASS	.
ERCC-00017	1085	.	A	C	.	PASS	.
ERCC-00017	1086	.	A	C	.	PASS	.
ERCC-00017	1087	.	A	C	.	PASS	.
ERCC-00017	1088	.	A	C	.	PASS	.
ERCC-00017	1089	.	A	C	.	PASS	.
ERCC-00017	1090	.	A	C	.	PASS	.
ERCC-00017	1091	.	A	C	.	PASS	.
ERCC-00017	1092	.	A	C	.	PASS	.
ERCC-00017	1093	.	A	C	.	PASS	.
ERCC-00017	1094	.	A	C	.	PASS	.
ERCC-00017	1095	.	A	C	.	PASS	.
ERCC-00017	1096	.	A	C	.	PASS	.
ERCC-00017	1097	.	A	C	.	PASS	.
ERCC-00017	1098	.	A	C	.	PASS	.
ERCC-00017	1099	.	A	C	.	PASS	.
ERCC-00017	1100	.	A	C	.	PASS	.
ERCC-00017	1101	.	A	C	.	PASS	.
ERCC-00017	1102	.	A	C	.	PASS	.
ERCC-00017	1103	.	A	C	.	PASS	.
ERCC-00017	1104	.	A	C	.	PASS	.
ERCC-00017	1105	.	A	C	.	PASS	.
ERCC-00017	1106	.	A	C	.	PASS	.
ERCC-00017	1107	.	A	C	.	PASS	.
ERCC-00017	1108	.	A	C	.	PASS	.
ERCC-00017	1114	.	A	C	.	PASS	.
ERCC-00017	1115	.	A	C	.	PASS	.
ERCC-00017	1116	.	A	C	.	PASS	.
ERCC-00017	1117	.	A	C	.	PASS	.
ERCC-00017	1118	.	A	C	.	PASS	.
ERCC-00017	1119	.	A	C	.	PASS	.
ERCC-00017	1120	.	A	C	.	PASS	.
ERCC-00017	1121	.	A	C	.	PASS	.
ERCC-00017	1122	.	A	C	.	PASS	.
ERCC-00017	1123	.	A	C	.	PASS	.
ERCC-00017	1124	.	A	C	.	PASS	.
ERCC-00017	1125	.	A	C	.	PASS	.
ERCC-00017	1126	.	A	C	.	PASS	.
ERCC-00017	1127	.	A	C	.	PASS	.
ERCC-00017	1128	.	A	C	.	PASS	.
ERCC-00017	1129	.	A	C	.	PASS	.
ERCC-00017	1130	.	A	C	.	PASS	.
ERCC-00017	1131	.	A	C	.	PASS	.
ERCC-00017	1132	.	A	C	.	PASS	.
ERCC-00017	1133	.	A	C	.	PASS	.
ERCC-00017	1134	.	A	C	.	PASS	.
ERCC-00017	1135	.	A	C	.	PASS	.
ERCC-00017	1136	.	A	C	.	PASS	.
ERCC-00018	599	.	A	C	.	PASS	.
ERCC-00018	948	.	A	C	.	PASS	.
ERCC-00018	949	.	A	C	.	PASS	.
ERCC-00018	950	.	A	C	.	PASS	.
ERCC-00018	951	.	A	C	.	PASS	.
ERCC-00018	952	.	A	C	.	PASS	.
ERCC-00018	953	.	A	C	.	PASS	.
ERCC-00018	954	.	A	C	.	PASS	.
ERCC-00018	955	.	A	C	.	PASS	.
ERCC-00018	956	.	A	C	.	PASS	.
ERCC-00018	957	.	A	C	.	PASS	.
ERCC-00018	958	.	A	C	.	PASS	.
ERCC-00018	959	.	A	C	.	PASS	.
ERCC-00018	960	.	A	C	.	PASS	.
ERCC-00018	961	.	A	C	.	PASS	.
ERCC-00018	962	.	A	C	.	PASS	.
ERCC-00018	963	.	A	C	.	PASS	.
ERCC-00018	964	.	A	C	.	PASS	.
ERCC-00018	965	.	A	C	.	PASS	.
ERCC-00018	966	.	A	C	.	PASS	.
ERCC-00018	967	.	A	C	.	PASS	.
ERCC-00018	968	.	A	C	.	PASS	.
ERCC-00018	969	.	A	C	.	PASS	.
ERCC-00018	970	.	A	C	.	PASS	.
ERCC-00018	971	.	A	C	.	PASS	.
ERCC-00018	972	.	A	C	.	PASS	.
ERCC-00018	973	.	A	C	.	PASS	.
ERCC-00018	974	.	A	C	.	PASS	.
ERCC-00018	975	.	A	C	.	PASS	.
ERCC-00018	976	.	A	C	.	PASS	.
ERCC-00018	977	.	A	C	.	PASS	.
ERCC-00018	978	.	A	C	.	PASS	.
ERCC-00018	979	.	A	C	.	PASS	.
ERCC-00018	980	.	A	C	.	PASS	.
ERCC-00018	981	.	A	C	.	PASS	.
ERCC-00018	982	.	A	C	.	PASS	.
ERCC-00018	983	.	A	C	.	PASS	.
ERCC-00018	984	.	A	C	.	PASS	.
ERCC-00018	985	.	A	C	.	PASS	.
ERCC-00018	986	.	A	C	.	PASS	.
ERCC-00018	987	.	A	C	.	PASS	.
ERCC-00018	988	.	A	C	.	PASS	.
ERCC-00018	989	.	A	C	.	PASS	.
ERCC-00018	990	.	A	C	.	PASS	.
ERCC-00018	991	.	A	C	.	PASS	.
ERCC-00018	992	.	A	C	.	PASS	.
ERCC-00018	993	.	A	C	.	PASS	.
ERCC-00018	994	.	A	C	.	PASS	.
ERCC-00018	995	.	A	C	.	PASS	.
ERCC-00018	996	.	A	C	.	PASS	.
ERCC-00018	997	.	A	C	.	PASS	.
ERCC-00018	998	.	A	C	.	PASS	.
ERCC-00018	1005	.	A	C	.	PASS	.
ERCC-00018	1006	.	A	C	.	PASS	.
ERCC-00018	1007	.	A	C	.	PASS	.
ERCC-00018	1008	.	A	C	.	PASS	.
ERCC-00018	1009	.	A	C	.	PASS	.
ERCC-00018	1010	.	A	C	.	PASS	.
ERCC-00018	1011	.	A	C	.	PASS	.
ERCC-00018	1012	.	A	C	.	PASS	.
ERCC-00018	1013	.	A	C	.	PASS	.
ERCC-00018	1014	.	A	C	.	PASS	.
ERCC-00018	1015	.	A	C	.	PASS	.
ERCC-00018	1016	.	A	C	.	PASS	.
ERCC-00018	1017	.	A	C	.	PASS	.
ERCC-00018	1018	.	A	C	.	PASS	.
ERCC-00018	1019	.	A	C	.	PASS	.
ERCC-00018	1020	.	A	C	.	PASS	.
ERCC-00018	1021	.	A	C	.	PASS	.
ERCC-00018	1022	.	A	C	.	PASS	.
ERCC-00018	1023	.	A	C	.	PASS	.
ERCC-00018	1024	.	A	C	.	PASS	.
ERCC-00018	1025	.	A	C	.	PASS	.
ERCC-00018	1026	.	A	C	.	PASS	.
ERCC-00019	566	.	A	C	.	PASS	.
ERCC-00019	567	.	A	C	.	PASS	.
ERCC-00019	568	.	A	C	.	PASS	.
ERCC-00019	569	.	A	C	.	PASS	.
ERCC-00019	570	.	A	C	.	PASS	.
ERCC-00019	571	.	A	C	.	PASS	.
ERCC-00019	572	.	A	C	.	PASS	.
ERCC-00019	573	.	A	C	.	PASS	.
ERCC-00019	574	.	A	C	.	PASS	.
ERCC-00019	575	.	A	C	.	PASS	.
ERCC-00019	576	.	A	C	.	PASS	.
ERCC-00019	577	.	A	C	.	PASS	.
ERCC-00019	578	.	A	C	.	PASS	.
ERCC-00019	579	.	A	C	.	PASS	.
ERCC-00019	580	.	A	C	.	PASS	.
ERCC-00019	581	.	A	C	.	PASS	.
ERCC-00019	582	.	A	C	.	PASS	.
ERCC-00019	583	.	A	C	.	PASS	.
ERCC-00019	584	.	A	C	.	PASS	.
ERCC-00019	585	.	A	C	.	PASS	.
ERCC-00019	586	.	A	C	.	PASS	.
ERCC-00019	587	.	A	C	.	PASS	.
ERCC-00019	588	.	A	C	.	PASS	.
ERCC-00019	589	.	A	C	.	PASS	.
ERCC-00019	590	.	A	C	.	PASS	.
ERCC-00019	591	.	A	C	.	PASS	.
ERCC-00019	592	.	A	C	.	PASS	.
ERCC-00019	593	.	A	C	.	PASS	.
ERCC-00019	594	.	A	C	.	PASS	.
ERCC-00019	595	.	A	C	.	PASS	.
ERCC-00019	596	.	A	C	.	PASS	.
ERCC-00019	597	.	A	C	.	PASS	.
ERCC-00019	598	.	A	C	.	PASS	.
ERCC-00019	599	.	A	C	.	PASS	.
ERCC-00019	600	.	A	C	.	PASS	.
ERCC-00019	601	.	A	C	.	PASS	.
ERCC-00019	602	.	A	C	.	PASS	.
ERCC-00019	603	.	A	C	.	PASS	.
ERCC-00019	604	.	A	C	.	PASS	.
ERCC-00019	605	.	A	C	.	PASS	.
ERCC-00019	606	.	A	C	.	PASS	.
ERCC-00019	607	.	A	C	.	PASS	.
ERCC-00019	608	.	A	C	.	PASS	.
ERCC-00019	609	.	A	C	.	PASS	.
ERCC-00019	610	.	A	C	.	PASS	.
ERCC-00019	611	.	A	C	.	PASS	.
ERCC-00019	612	.	A	C	.	PASS	.
ERCC-00019	613	.	A	C	.	PASS	.
ERCC-00019	614	.	A	C	.	PASS	.
ERCC-00019	615	.	A	C	.	PASS	.
ERCC-00019	616	.	A	C	.	PASS	.
ERCC-00019	620	.	A	C	.	PASS	.
ERCC-00019	621	.	A	C	.	PASS	.
ERCC-00019	622	.	A	C	.	PASS	.
ERCC-00019	623	.	A	C	.	PASS	.
ERCC-00019	624	.	A	C	.	PASS	.
ERCC-00019	625	.	A	C	.	PASS	.
ERCC-00019	626	.	A	C	.	PASS	.
ERCC-00019	627	.	A	C	.	PASS	.
ERCC-00019	628	.	A	C	.	PASS	.
ERCC-00019	629	.	A	C	.	PASS	.
ERCC-00019	630	.	A	C	.	PASS	.
ERCC-00019	631	.	A	C	.	PASS	.
ERCC-00019	632	.	A	C	.	PASS	.
ERCC-00019	633	.	A	C	.	PASS	.
ERCC-00019	634	.	A	C	.	PASS	.
ERCC-00019	635	.	A	C	.	PASS	.
ERCC-00019	636	.	A	C	.	PASS	.
ERCC-00019	637	.	A	C	.	PASS	.
ERCC-00019	638	.	A	C	.	PASS	.
ERCC-00019	639	.	A	C	.	PASS	.
ERCC-00019	640	.	A	C	.	PASS	.
ERCC-00019	641	.	A	C	.	PASS	.
ERCC-00019	642	.	A	C	.	PASS	.
ERCC-00019	643	.	A	C	.	PASS	.
ERCC-00019	644	.	A	C	.	PASS	.
ERCC-00022	676	.	A	C	.	PASS	.
ERCC-00022	677	.	A	C	.	PASS	.
ERCC-00022	678	.	A	C	.	PASS	.
ERCC-00022	679	.	A	C	.	PASS	.
ERCC-00022	680	.	A	C	.	PASS	.
ERCC-00022	681	.	A	C	.	PASS	.
ERCC-00022	682	.	A	C	.	PASS	.
ERCC-00022	683	.	A	C	.	PASS	.
ERCC-00022	684	.	A	C	.	PASS	.
ERCC-00022	685	.	A	C	.	PASS	.
ERCC-00022	686	.	A	C	.	PASS	.
ERCC-00022	687	.	A	C	.	PASS	.
ERCC-00022	688	.	A	C	.	PASS	.
ERCC-00022	689	.	A	C	.	PASS	.
ERCC-00022	690	.	A	C	.	PASS	.
ERCC-00022	691	.	A	C	.	PASS	.
ERCC-00022	692	.	A	C	.	PASS	.
ERCC-00022	693	.	A	C	.	PASS	.
ERCC-00022	694	.	A	C	.	PASS	.
ERCC-00022	695	.	A	C	.	PASS	.
ERCC-00022	696	.	A	C	.	PASS	.
ERCC-00022	697	.	A	C	.	PASS	.
ERCC-00022	698	.	A	C	.	PASS	.
ERCC-00022	699	.	A	C	.	PASS	.
ERCC-00022	700	.	A	C	.	PASS	.
ERCC-00022	701	.	A	C	.	PASS	.
ERCC-00022	702	.	A	C	.	PASS	.
ERCC-00022	703	.	A	C	.	PASS	.
ERCC-00022	704	.	A	C	.	PASS	.
ERCC-00022	705	.	A	C	.	PASS	.
ERCC-00022	706	.	A	C	.	PASS	.
ERCC-00022	707	.	A	C	.	PASS	.
ERCC-00022	708	.	A	C	.	PASS	.
ERCC-00022	709	.	A	C	.	PASS	.
ERCC-00022	710	.	A	C	.	PASS	.
ERCC-00022	711	.	A	C	.	PASS	.
ERCC-00022	712	.	A	C	.	PASS	.
ERCC-00022	713	.	A	C	.	PASS	.
ERCC-00022	714	.	A	C	.	PASS	.
ERCC-00022	715	.	A	C	.	PASS	.
ERCC-00022	716	.	A	C	.	PASS	.
ERCC-00022	717	.	A	C	.	PASS	.
ERCC-00022	718	.	A	C	.	PASS	.
ERCC-00022	719	.	A	C	.	PASS	.
ERCC-00022	720	.	A	C	.	PASS	.
ERCC-00022	721	.	A	C	.	PASS	.
ERCC-00022	722	.	A	C	.	PASS	.
ERCC-00022	723	.	A	C	.	PASS	.
ERCC-00022	724	.	A	C	.	PASS	.
ERCC-00022	725	.	A	C	.	PASS	.
ERCC-00022	726	.	A	C	.	PASS	.
ERCC-00022	728	.	A	C	.	PASS	.
ERCC-00022	729	.	A	C	.	PASS	.
ERCC-00022	730	.	A	C	.	PASS	.
ERCC-00022	731	.	A	C	.	PASS	.
ERCC-00022	732	.	A	C	.	PASS	.
ERCC-00022	733	.	A	C	.	PASS	.
ERCC-00022	734	.	A	C	.	PASS	.
ERCC-00022	735	.	A	C	.	PASS	.
ERCC-00022	736	.	A	C	.	PASS	.
ERCC-00022	737	.	A	C	.	PASS	.
ERCC-00022	738	.	A	C	.	PASS	.
ERCC-00022	739	.	A	C	.	PASS	.
ERCC-00022	740	.	A	C	.	PASS	.
ERCC-00022	741	.	A	C	.	PASS	.
ERCC-00022	742	.	A	C	.	PASS	.
ERCC-00022	743	.	A	C	.	PASS	.
ERCC-00022	744	.	A	C	.	PASS	.
ERCC-00022	745	.	A	C	.	PASS	.
ERCC-00022	746	.	A	C	.	PASS	.
ERCC-00022	747	.	A	C	.	PASS	.
ERCC-00022	748	.	A	C	.	PASS	.
ERCC-00022	749	.	A	C	.	PASS	.
ERCC-00022	750	.	A	C	.	PASS	.
ERCC-00022	751	.	A	C	.	PASS	.
ERCC-00023	193	.	A	C	.	PASS	.
ERCC-00023	194	.	A	C	.	PASS	.
ERCC-00023	195	.	A	C	.	PASS	.
ERCC-00023	196	.	A	C	.	PASS	.
ERCC-00023	197	.	A	C	.	PASS	.
ERCC-00023	198	.	A	C	.	PASS	.
ERCC-00023	199	.	A	C	.	PASS	.
ERCC-00023	200	.	A	C	.	PASS	.
ERCC-00023	201	.	A	C	.	PASS	.
ERCC-00023	202	.	A	C	.	PASS	.
ERCC-00023	203	.	A	C	.	PASS	.
ERCC-00023	204	.	A	C	.	PASS	.
ERCC-00023	205	.	A	C	.	PASS	.
ERCC-00023	206	.	A	C	.	PASS	.
ERCC-00023	207	.	A	C	.	PASS	.
ERCC-00023	208	.	A	C	.	PASS	.
ERCC-00023	209	.	A	C	.	PASS	.
ERCC-00023	210	.	A	C	.	PASS	.
ERCC-00023	211	.	A	C	.	PASS	.
ERCC-00023	212	.	A	C	.	PASS	.
ERCC-00023	213	.	A	C	.	PASS	.
ERCC-00023	214	.	A	C	.	PASS	.
ERCC-00023	215	.	A	C	.	PASS	.
ERCC-00023	216	.	A	C	.	PASS	.
ERCC-00023	217	.	A	C	.	PASS	.
ERCC-00023	218	.	A	C	.	PASS	.
ERCC-00023	219	.	A	C	.	PASS	.
ERCC-00023	220	.	A	C	.	PASS	.
ERCC-00023	221	.	A	C	.	PASS	.
ERCC-00023	222	.	A	C	.	PASS	.
ERCC-00023	223	.	A	C	.	PASS	.
ERCC-00023	224	.	A	C	.	PASS	.
ERCC-00023	225	.	A	C	.	PASS	.
ERCC-00023	226	.	A	C	.	PASS	.
ERCC-00023	227	.	A	C	.	PASS	.
ERCC-00023	228	.	A	C	.	PASS	.
ERCC-00023	229	.	A	C	.	PASS	.
ERCC-00023	230	.	A	C	.	PASS	.
ERCC-00023	231	.	A	C	.	PASS	.
ERCC-00023	232	.	A	C	.	PASS	.
ERCC-00023	233	.	A	C	.	PASS	.
ERCC-00023	234	.	A	C	.	PASS	.
ERCC-00023	235	.	A	C	.	PASS	.
ERCC-00023	236	.	A	C	.	PASS	.
ERCC-00023	237	.	A	C	.	PASS	.
ERCC-00023	238	.	A	C	.	PASS	.
ERCC-00023	239	.	A	C	.	PASS	.
ERCC-00023	240	.	A	C	.	PASS	.
ERCC-00023	241	.	A	C	.	PASS	.
ERCC-00023	242	.	A	C	.	PASS	.
ERCC-00023	243	.	A	C	.	PASS	.
ERCC-00023	250	.	A	C	.	PASS	.
ERCC-00023	251	.	A	C	.	PASS	.
ERCC-00023	252	.	A	C	.	PASS	.
ERCC-00023	253	.	A	C	.	PASS	.
ERCC-00023	254	.	A	C	.	PASS	.
ERCC-00023	255	.	A	C	.	PASS	.
ERCC-00023	256	.	A	C	.	PASS	.
ERCC-00023	257	.	A	C	.	PASS	.
ERCC-00023	258	.	A	C	.	PASS	.
ERCC-00023	259	.	A	C	.	PASS	.
ERCC-00023	260	.	A	C	.	PASS	.
ERCC-00023	261	.	A	C	.	PASS	.
ERCC-00023	262	.	A	C	.	PASS	.
ERCC-00023	263	.	A	C	.	PASS	.
ERCC-00023	264	.	A	C	.	PASS	.
ERCC-00023	265	.	A	C	.	PASS	.
ERCC-00023	266	.	A	C	.	PASS	.
ERCC-00023	267	.	A	C	.	PASS	.
ERCC-00023	268	.	A	C	.	PASS	.
ERCC-00023	269	.	A	C	.	PASS	.
ERCC-00023	270	.	A	C	.	PASS	.
ERCC-00023	271	.	A	C	.	PASS	.
ERCC-00023	272	.	A	C	.	PASS	.
ERCC-00023	273	.	A	C	.	PASS	.
ERCC-00024	455	.	A	C	.	PASS	.
ERCC-00024	456	.	A	C	.	PASS	.
ERCC-00024	457	.	A	C	.	PASS	.
ERCC-00024	458	.	A	C	.	PASS	.
ERCC-00024	459	.	A	C	.	PASS	.
ERCC-00024	460	.	A	C	.	PASS	.
ERCC-00024	461	.	A	C	.	PASS	.
ERCC-00024	462	.	A	C	.	PASS	.
ERCC-00024	463	.	A	C	.	PASS	.
ERCC-00024	464	.	A	C	.	PASS	.
ERCC-00024	465	.	A	C	.	PASS	.
ERCC-00024	466	.	A	C	.	PASS	.
ERCC-00024	467	.	A	C	.	PASS	.
ERCC-00024	468	.	A	C	.	PASS	.
ERCC-00024	469	.	A	C	.	PASS	.
ERCC-00024	470	.	A	C	.	PASS	.
ERCC-00024	471	.	A	C	.	PASS	.
ERCC-00024	472	.	A	C	.	PASS	.
ERCC-00024	473	.	A	C	.	PASS	.
ERCC-00024	474	.	A	C	.	PASS	.
ERCC-00024	475	.	A	C	.	PASS	.
ERCC-00024	476	.	A	C	.	PASS	.
ERCC-00024	477	.	A	C	.	PASS	.
ERCC-00024	478	.	A	C	.	PASS	.
ERCC-00024	479	.	A	C	.	PASS	.
ERCC-00024	480	.	A	C	.	PASS	.
ERCC-00024	481	.	A	C	.	PASS	.
ERCC-00024	482	.	A	C	.	PASS	.
ERCC-00024	483	.	A	C	.	PASS	.
ERCC-00024	484	.	A	C	.	PASS	.
ERCC-00024	485	.	A	C	.	PASS	.
ERCC-00024	486	.	A	C	.	PASS	.
ERCC-00024	487	.	A	C	.	PASS	.
ERCC-00024	488	.	A	C	.	PASS	.
ERCC-00024	489	.	A	C	.	PASS	.
ERCC-00024	490	.	A	C	.	PASS	.
ERCC-00024	491	.	A	C	.	PASS	.
ERCC-00024	492	.	A	C	.	PASS	.
ERCC-00024	493	.	A	C	.	PASS	.
ERCC-00024	494	.	A	C	.	PASS	.
ERCC-00024	495	.	A	C	.	PASS	.
ERCC-00024	496	.	A	C	.	PASS	.
ERCC-00024	497	.	A	C	.	PASS	.
ERCC-00024	498	.	A	C	.	PASS	.
ERCC-00024	499	.	A	C	.	PASS	.
ERCC-00024	500	.	A	C	.	PASS	.
ERCC-00024	501	.	A	C	.	PASS	.
ERCC-00024	502	.	A	C	.	PASS	.
ERCC-00024	503	.	A	C	.	PASS	.
ERCC-00024	504	.	A	C	.	PASS	.
ERCC-00024	505	.	A	C	.	PASS	.
ERCC-00024	512	.	A	C	.	PASS	.
ERCC-00024	513	.	A	C	.	PASS	.
ERCC-00024	514	.	A	C	.	PASS	.
ERCC-00024	515	.	A	C	.	PASS	.
ERCC-00024	516	.	A	C	.	PASS	.
ERCC-00024	517	.	A	C	.	PASS	.
ERCC-00024	518	.	A	C	.	PASS	.
ERCC-00024	519	.	A	C	.	PASS	.
ERCC-00024	520	.	A	C	.	PASS	.
ERCC-00024	521	.	A	C	.	PASS	.
ERCC-00024	522	.	A	C	.	PASS	.
ERCC-00024	523	.	A	C	.	PASS	.
ERCC-00024	524	.	A	C	.	PASS	.
ERCC-00024	525	.	A	C	.	PASS	.
ERCC-00024	526	.	A	C	.	PASS	.
ERCC-00024	527	.	A	C	.	PASS	.
ERCC-00024	528	.	A	C	.	PASS	.
ERCC-00024	529	.	A	C	.	PASS	.
ERCC-00024	530	.	A	C	.	PASS	.
ERCC-00024	531	.	A	C	.	PASS	.
ERCC-00024	532	.	A	C	.	PASS	.
ERCC-00024	533	.	A	C	.	PASS	.
ERCC-00024	534	.	A	C	.	PASS	.
ERCC-00024	535	.	A	C	.	PASS	.
ERCC-00024	536	.	A	C	.	PASS	.
ERCC-00025	1913	.	A	C	.	PASS	.
ERCC-00025	1914	.	A	C	.	PASS	.
ERCC-00025	1915	.	A	C	.	PASS	.
ERCC-00025	1916	.	A	C	.	PASS	.
ERCC-00025	1917	.	A	C	.	PASS	.
ERCC-00025	1918	.	A	C	.	PASS	.
ERCC-00025	1919	.	A	C	.	PASS	.
ERCC-00025	1920	.	A	C	.	PASS	.
ERCC-00025	1921	.	A	C	.	PASS	.
ERCC-00025	1922	.	A	C	.	PASS	.
ERCC-00025	1923	.	A	C	.	PASS	.
ERCC-00025	1924	.	A	C	.	PASS	.
ERCC-00025	1925	.	A	C	.	PASS	.
ERCC-00025	1926	.	A	C	.	PASS	.
ERCC-00025	1927	.	A	C	.	PASS	.
ERCC-00025	1928	.	A	C	.	PASS	.
ERCC-00025	1929	.	A	C	.	PASS	.
ERCC-00025	1930	.	A	C	.	PASS	.
ERCC-00025	1931	.	A	C	.	PASS	.
ERCC-00025	1932	.	A	C	.	PASS	.
ERCC-00025	1933	.	A	C	.	PASS	.
ERCC-00025	1934	.	A	C	.	PASS	.
ERCC-00025	1935	.	A	C	.	PASS	.
ERCC-00025	1936	.	A	C	.	PASS	.
ERCC-00025	1937	.	A	C	.	PASS	.
ERCC-00025	1938	.	A	C	.	PASS	.
ERCC-00025	1939	.	A	C	.	PASS	.
ERCC-00025	1940	.	A	C	.	PASS	.
ERCC-00025	1941	.	A	C	.	PASS	.
ERCC-00025	1942	.	A	C	.	PASS	.
ERCC-00025	1943	.	A	C	.	PASS	.
ERCC-00025	1944	.	A	C	.	PASS	.
ERCC-00025	1945	.	A	C	.	PASS	.
ERCC-00025	1946	.	A	C	.	PASS	.
ERCC-00025	1947	.	A	C	.	PASS	.
ERCC-00025	1948	.	A	C	.	PASS	.
ERCC-00025	1949	.	A	C	.	PASS	.
ERCC-00025	1950	.	A	C	.	PASS	.
ERCC-00025	1951	.	A	C	.	PASS	.
ERCC-00025	1952	.	A	C	.	PASS	.
ERCC-00025	1953	.	A	C	.	PASS	.
ERCC-00025	1954	.	A	C	.	PASS	.
ERCC-00025	1955	.	A	C	.	PASS	.
ERCC-00025	1956	.	A	C	.	PASS	.
ERCC-00025	1957	.	A	C	.	PASS	.
ERCC-00025	1958	.	A	C	.	PASS	.
ERCC-00025	1959	.	A	C	.	PASS	.
ERCC-00025	1960	.	A	C	.	PASS	.
ERCC-00025	1961	.	A	C	.	PASS	.
ERCC-00025	1962	.	A	C	.	PASS	.
ERCC-00025	1963	.	A	C	.	PASS	.
ERCC-00025	1971	.	A	C	.	PASS	.
ERCC-00025	1972	.	A	C	.	PASS	.
ERCC-00025	1973	.	A	C	.	PASS	.
ERCC-00025	1974	.	A	C	.	PASS	.
ERCC-00025	1975	.	A	C	.	PASS	.
ERCC-00025	1976	.	A	C	.	PASS	.
ERCC-00025	1977	.	A	C	.	PASS	.
ERCC-00025	1978	.	A	C	.	PASS	.
ERCC-00025	1979	.	A	C	.	PASS	.
ERCC-00025	1980	.	A	C	.	PASS	.
ERCC-00025	1981	.	A	C	.	PASS	.
ERCC-00025	1982	.	A	C	.	PASS	.
ERCC-00025	1983	.	A	C	.	PASS	.
ERCC-00025	1984	.	A	C	.	PASS	.
ERCC-00025	1985	.	A	C	.	PASS	.
ERCC-00025	1986	.	A	C	.	PASS	.
ERCC-00025	1987	.	A	C	.	PASS	.
ERCC-00025	1988	.	A	C	.	PASS	.
ERCC-00025	1989	.	A	C	.	PASS	.
ERCC-00025	1990	.	A	C	.	PASS	.
ERCC-00025	1991	.	A	C	.	PASS	.
ERCC-00025	1992	.	A	C	.	PASS	.
ERCC-00025	1993	.	A	C	.	PASS	.
ERCC-00025	1994	.	A	C	.	PASS	.
ERCC-00028	1049	.	A	C	.	PASS	.
ERCC-00028	1050	.	A	C	.	PASS	.
ERCC-00028	1051	.	A	C	.	PASS	.
ERCC-00028	1052	.	A	C	.	PASS	.
ERCC-00028	1053	.	A	C	.	PASS	.
ERCC-00028	1054	.	A	C	.	PASS	.
ERCC-00028	1055	.	A	C	.	PASS	.
ERCC-00028	1056	.	A	C	.	PASS	.
ERCC-00028	1057	.	A	C	.	PASS	.
ERCC-00028	1058	.	A	C	.	PASS	.
ERCC-00028	1059	.	A	C	.	PASS	.
ERCC-00028	1060	.	A	C	.	PASS	.
ERCC-00028	1061	.	A	C	.	PASS	.
ERCC-00028	1062	.	A	C	.	PASS	.
ERCC-00028	1063	.	A	C	.	PASS	.
ERCC-00028	1064	.	A	C	.	PASS	.
ERCC-00028	1065	.	A	C	.	PASS	.
ERCC-00028	1066	.	A	C	.	PASS	.
ERCC-00028	1067	.	A	C	.	PASS	.
ERCC-00028	1068	.	A	C	.	PASS	.
ERCC-00028	1069	.	A	C	.	PASS	.
ERCC-00028	1070	.	A	C	.	PASS	.
ERCC-00028	1071	.	A	C	.	PASS	.
ERCC-00028	1072	.	A	C	.	PASS	.
ERCC-00028	1073	.	A	C	.	PASS	.
ERCC-00028	1074	.	A	C	.	PASS	.
ERCC-00028	1075	.	A	C	.	PASS	.
ERCC-00028	1076	.	A	C	.	PASS	.
ERCC-00028	1077	.	A	C	.	PASS	.
ERCC-00028	1078	.	A	C	.	PASS	.
ERCC-00028	1079	.	A	C	.	PASS	.
ERCC-00028	1080	.	A	C	.	PASS	.
ERCC-00028	1081	.	A	C	.	PASS	.
ERCC-00028	1082	.	A	C	.	PASS	.
ERCC-00028	1083	.	A	C	.	PASS	.
ERCC-00028	1084	.	A	C	.	PASS	.
ERCC-00028	1085	.	A	C	.	PASS	.
ERCC-00028	1086	.	A	C	.	PASS	.
ERCC-00028	1087	.	A	C	.	PASS	.
ERCC-00028	1088	.	A	C	.	PASS	.
ERCC-00028	1089	.	A	C	.	PASS	.
ERCC-00028	1090	.	A	C	.	PASS	.
ERCC-00028	1091	.	A	C	.	PASS	.
ERCC-00028	1092	.	A	C	.	PASS	.
ERCC-00028	1093	.	A	C	.	PASS	.
ERCC-00028	1094	.	A	C	.	PASS	.
ERCC-00028	1095	.	A	C	.	PASS	.
ERCC-00028	1096	.	A	C	.	PASS	.
ERCC-00028	1097	.	A	C	.	PASS	.
ERCC-00028	1098	.	A	C	.	PASS	.
ERCC-00028	1099	.	A	C	.	PASS	.
ERCC-00028	1107	.	A	C	.	PASS	.
ERCC-00028	1108	.	A	C	.	PASS	.
ERCC-00028	1109	.	A	C	.	PASS	.
ERCC-00028	1110	.	A	C	.	PASS	.
ERCC-00028	1111	.	A	C	.	PASS	.
ERCC-00028	1112	.	A	C	.	PASS	.
ERCC-00028	1113	.	A	C	.	PASS	.
ERCC-00028	1114	.	A	C	.	PASS	.
ERCC-00028	1115	.	A	C	.	PASS	.
ERCC-00028	1116	.	A	C	.	PASS	.
ERCC-00028	1117	.	A	C	.	PASS	.
ERCC-00028	1118	.	A	C	.	PASS	.
ERCC-00028	1119	.	A	C	.	PASS	.
ERCC-00028	1120	.	A	C	.	PASS	.
ERCC-00028	1121	.	A	C	.	PASS	.
ERCC-00028	1122	.	A	C	.	PASS	.
ERCC-00028	1123	.	A	C	.	PASS	.
ERCC-00028	1124	.	A	C	.	PASS	.
ERCC-00028	1125	.	A	C	.	PASS	.
ERCC-00028	1126	.	A	C	.	PASS	.
ERCC-00028	1127	.	A	C	.	PASS	.
ERCC-00028	1128	.	A	C	.	PASS	.
ERCC-00028	1129	.	A	C	.	PASS	.
ERCC-00028	1130	.	A	C	.	PASS	.
ERCC-00031	1062	.	A	C	.	PASS	.
ERCC-00031	1063	.	A	C	.	PASS	.
ERCC-00031	1064	.	A	C	.	PASS	.
ERCC-00031	1065	.	A	C	.	PASS	.
ERCC-00031	1066	.	A	C	.	PASS	.
ERCC-00031	1067	.	A	C	.	PASS	.
ERCC-00031	1068	.	A	C	.	PASS	.
ERCC-00031	1069	.	A	C	.	PASS	.
ERCC-00031	1070	.	A	C	.	PASS	.
ERCC-00031	1071	.	A	C	.	PASS	.
ERCC-00031	1072	.	A	C	.	PASS	.
ERCC-00031	1073	.	A	C	.	PASS	.
ERCC-00031	1074	.	A	C	.	PASS	.
ERCC-00031	1075	.	A	C	.	PASS	.
ERCC-00031	1076	.	A	C	.	PASS	.
ERCC-00031	1077	.	A	C	.	PASS	.
ERCC-00031	1078	.	A	C	.	PASS	.
ERCC-00031	1079	.	A	C	.	PASS	.
ERCC-00031	1080	.	A	C	.	PASS	.
ERCC-00031	1081	.	A	C	.	PASS	.
ERCC-00031	1082	.	A	C	.	PASS	.
ERCC-00031	1083	.	A	C	.	PASS	.
ERCC-00031	1084	.	A	C	.	PASS	.
ERCC-00031	1085	.	A	C	.	PASS	.
ERCC-00031	1086	.	A	C	.	PASS	.
ERCC-00031	1087	.	A	C	.	PASS	.
ERCC-00031	1088	.	A	C	.	PASS	.
ERCC-00031	1089	.	A	C	.	PASS	.
ERCC-00031	1090	.	A	C	.	PASS	.
ERCC-00031	1091	.	A	C	.	PASS	.
ERCC-00031	1092	.	A	C	.	PASS	.
ERCC-00031	1093	.	A	C	.	PASS	.
ERCC-00031	1094	.	A	C	.	PASS	.
ERCC-00031	1095	.	A	C	.	PASS	.
ERCC-00031	1096	.	A	C	.	PASS	.
ERCC-00031	1097	.	A	C	.	PASS	.
ERCC-00031	1098	.	A	C	.	PASS	.
ERCC-00031	1099	.	A	C	.	PASS	.
ERCC-00031	1100	.	A	C	.	PASS	.
ERCC-00031	1101	.	A	C	.	PASS	.
ERCC-00031	1102	.	A	C	.	PASS	.
ERCC-00031	1103	.	A	C	.	PASS	.
ERCC-00031	1104	.	A	C	.	PASS	.
ERCC-00031	1105	.	A	C	.	PASS	.
ERCC-00031	1106	.	A	C	.	PASS	.
ERCC-00031	1107	.	A	C	.	PASS	.
ERCC-00031	1108	.	A	C	.	PASS	.
ERCC-00031	1109	.	A	C	.	PASS	.
ERCC-00031	1110	.	A	C	.	PASS	.
ERCC-00031	1111	.	A	C	.	PASS	.
ERCC-00031	1112	.	A	C	.	PASS	.
ERCC-00031	1115	.	A	C	.	PASS	.
ERCC-00031	1116	.	A	C	.	PASS	.
ERCC-00031	1117	.	A	C	.	PASS	.
ERCC-00031	1118	.	A	C	.	PASS	.
ERCC-00031	1119	.	A	C	.	PASS	.
ERCC-00031	1120	.	A	C	.	PASS	.
ERCC-00031	1121	.	A	C	.	PASS	.
ERCC-00031	1122	.	A	C	.	PASS	.
ERCC-00031	1123	.	A	C	.	PASS	.
ERCC-00031	1124	.	A	C	.	PASS	.
ERCC-00031	1125	.	A	C	.	PASS	.
ERCC-00031	1126	.	A	C	.	PASS	.
ERCC-00031	1127	.	A	C	.	PASS	.
ERCC-00031	1128	.	A	C	.	PASS	.
ERCC-00031	1129	.	A	C	.	PASS	.
ERCC-00031	1130	.	A	C	.	PASS	.
ERCC-00031	1131	.	A	C	.	PASS	.
ERCC-00031	1132	.	A	C	.	PASS	.
ERCC-00031	1133	.	A	C	.	PASS	.
ERCC-00031	1134	.	A	C	.	PASS	.
ERCC-00031	1135	.	A	C	.	PASS	.
ERCC-00031	1136	.	A	C	.	PASS	.
ERCC-00031	1137	.	A	C	.	PASS	.
ERCC-00031	1138	.	A	C	.	PASS	.
ERCC-00033	1937	.	A	C	.	PASS	.
ERCC-00033	1938	.	A	C	.	PASS	.
ERCC-00033	1939	.	A	C	.	PASS	.
ERCC-00033	1940	.	A	C	.	PASS	.
ERCC-00033	1941	.	A	C	.	PASS	.
ERCC-00033	1942	.	A	C	.	PASS	.
ERCC-00033	1943	.	A	C	.	PASS	.
ERCC-00033	1944	.	A	C	.	PASS	.
ERCC-00033	1945	.	A	C	.	PASS	.
ERCC-00033	1946	.	A	C	.	PASS	.
ERCC-00033	1947	.	A	C	.	PASS	.
ERCC-00033	1948	.	A	C	.	PASS	.
ERCC-00033	1949	.	A	C	.	PASS	.
ERCC-00033	1950	.	A	C	.	PASS	.
ERCC-00033	1951	.	A	C	.	PASS	.
ERCC-00033	1952	.	A	C	.	PASS	.
ERCC-00033	1953	.	A	C	.	PASS	.
ERCC-00033	1954	.	A	C	.	PASS	.
ERCC-00033	1955	.	A	C	.	PASS	.
ERCC-00033	1956	.	A	C	.	PASS	.
ERCC-00033	1957	.	A	C	.	PASS	.
ERCC-00033	1958	.	A	C	.	PASS	.
ERCC-00033	1959	.	A	C	.	PASS	.
ERCC-00033	1960	.	A	C	.	PASS	.
ERCC-00033	1961	.	A	C	.	PASS	.
ERCC-00033	1962	.	A	C	.	PASS	.
ERCC-00033	1963	.	A	C	.	PASS	.
ERCC-00033	1964	.	A	C	.	PASS	.
ERCC-00033	1965	.	A	C	.	PASS	.
ERCC-00033	1966	.	A	C	.	PASS	.
ERCC-00033	1967	.	A	C	.	PASS	.
ERCC-00033	1968	.	A	C	.	PASS	.
ERCC-00033	1969	.	A	C	.	PASS	.
ERCC-00033	1970	.	A	C	.	PASS	.
ERCC-00033	1971	.	A	C	.	PASS	.
ERCC-00033	1972	.	A	C	.	PASS	.
ERCC-00033	1973	.	A	C	.	PASS	.
ERCC-00033	1974	.	A	C	.	PASS	.
ERCC-00033	1975	.	A	C	.	PASS	.
ERCC-00033	1976	.	A	C	.	PASS	.
ERCC-00033	1977	.	A	C	.	PASS	.
ERCC-00033	1978	.	A	C	.	PASS	.
ERCC-00033	1979	.	A	C	.	PASS	.
ERCC-00033	1980	.	A	C	.	PASS	.
ERCC-00033	1981	.	A	C	.	PASS	.
ERCC-00033	1982	.	A	C	.	PASS	.
ERCC-00033	1983	.	A	C	.	PASS	.
ERCC-00033	1984	.	A	C	.	PASS	.
ERCC-00033	1985	.	A	C	.	PASS	.
ERCC-00033	1986	.	A	C	.	PASS	.
ERCC-00033	1987	.	A	C	.	PASS	.
ERCC-00033	2001	.	A	C	.	PASS	.
ERCC-00033	2002	.	A	C	.	PASS	.
ERCC-00033	2003	.	A	C	.	PASS	.
ERCC-00033	2004	.	A	C	.	PASS	.
ERCC-00033	2005	.	A	C	.	PASS	.
ERCC-00033	2006	.	A	C	.	PASS	.
ERCC-00033	2007	.	A	C	.	PASS	.
ERCC-00033	2008	.	A	C	.	PASS	.
ERCC-00033	2009	.	A	C	.	PASS	.
ERCC-00033	2010	.	A	C	.	PASS	.
ERCC-00033	2011	.	A	C	.	PASS	.
ERCC-00033	2012	.	A	C	.	PASS	.
ERCC-00033	2013	.	A	C	.	PASS	.
ERCC-00033	2014	.	A	C	.	PASS	.
ERCC-00033	2015	.	A	C	.	PASS	.
ERCC-00033	2016	.	A	C	.	PASS	.
ERCC-00033	2017	.	A	C	.	PASS	.
ERCC-00033	2018	.	A	C	.	PASS	.
ERCC-00033	2019	.	A	C	.	PASS	.
ERCC-00033	2020	.	A	C	.	PASS	.
ERCC-00033	2021	.	A	C	.	PASS	.
ERCC-00033	2022	.	A	C	.	PASS	.
ERCC-00034	941	.	A	C	.	PASS	.
ERCC-00034	942	.	A	C	.	PASS	.
ERCC-00034	943	.	A	C	.	PASS	.
ERCC-00034	944	.	A	C	.	PASS	.
ERCC-00034	945	.	A	C	.	PASS	.
ERCC-00034	946	.	A	C	.	PASS	.
ERCC-00034	947	.	A	C	.	PASS	.
ERCC-00034	948	.	A	C	.	PASS	.
ERCC-00034	949	.	A	C	.	PASS	.
ERCC-00034	950	.	A	C	.	PASS	.
ERCC-00034	951	.	A	C	.	PASS	.
ERCC-00034	952	.	A	C	.	PASS	.
ERCC-00034	953	.	A	C	.	PASS	.
ERCC-00034	954	.	A	C	.	PASS	.
ERCC-00034	955	.	A	C	.	PASS	.
ERCC-00034	956	.	A	C	.	PASS	.
ERCC-00034	957	.	A	C	.	PASS	.
ERCC-00034	958	.	A	C	.	PASS	.
ERCC-00034	959	.	A	C	.	PASS	.
ERCC-00034	960	.	A	C	.	PASS	.
ERCC-00034	961	.	A	C	.	PASS	.
ERCC-00034	962	.	A	C	.	PASS	.
ERCC-00034	963	.	A	C	.	PASS	.
ERCC-00034	964	.	A	C	.	PASS	.
ERCC-00034	965	.	A	C	.	PASS	.
ERCC-00034	966	.	A	C	.	PASS	.
ERCC-00034	967	.	A	C	.	PASS	.
ERCC-00034	968	.	A	C	.	PASS	.
ERCC-00034	969	.	A	C	.	PASS	.
ERCC-00034	970	.	A	C	.	PASS	.
ERCC-00034	971	.	A	C	.	PASS	.
ERCC-00034	972	.	A	C	.	PASS	.
ERCC-00034	973	.	A	C	.	PASS	.
ERCC-00034	974	.	A	C	.	PASS	.
ERCC-00034	975	.	A	C	.	PASS	.
ERCC-00034	976	.	A	C	.	PASS	.
ERCC-00034	977	.	A	C	.	PASS	.
ERCC-00034	978	.	A	C	.	PASS	.
ERCC-00034	979	.	A	C	.	PASS	.
ERCC-00034	980	.	A	C	.	PASS	.
ERCC-00034	981	.	A	C	.	PASS	.
ERCC-00034	982	.	A	C	.	PASS	.
ERCC-00034	983	.	A	C	.	PASS	.
ERCC-00034	984	.	A	C	.	PASS	.
ERCC-00034	985	.	A	C	.	PASS	.
ERCC-00034	986	.	A	C	.	PASS	.
ERCC-00034	987	.	A	C	.	PASS	.
ERCC-00034	988	.	A	C	.	PASS	.
ERCC-00034	989	.	A	C	.	PASS	.
ERCC-00034	990	.	A	C	.	PASS	.
ERCC-00034	991	.	A	C	.	PASS	.
ERCC-00034	996	.	A	C	.	PASS	.
ERCC-00034	997	.	A	C	.	PASS	.
ERCC-00034	998	.	A	C	.	PASS	.
ERCC-00034	999	.	A	C	.	PASS	.
ERCC-00034	1000	.	A	C	.	PASS	.
ERCC-00034	1001	.	A	C	.	PASS	.
ERCC-00034	1002	.	A	C	.	PASS	.
ERCC-00034	1003	.	A	C	.	PASS	.
ERCC-00034	1004	.	A	C	.	PASS	.
ERCC-00034	1005	.	A	C	.	PASS	.
ERCC-00034	1006	.	A	C	.	PASS	.
ERCC-00034	1007	.	A	C	.	PASS	.
ERCC-00034	1008	.	A	C	.	PASS	.
ERCC-00034	1009	.	A	C	.	PASS	.
ERCC-00034	1010	.	A	C	.	PASS	.
ERCC-00034	1011	.	A	C	.	PASS	.
ERCC-00034	1012	.	A	C	.	PASS	.
ERCC-00034	1013	.	A	C	.	PASS	.
ERCC-00034	1014	.	A	C	.	PASS	.
ERCC-00034	1015	.	A	C	.	PASS	.
ERCC-00034	1016	.	A	C	.	PASS	.
ERCC-00034	1017	.	A	C	.	PASS	.
ERCC-00034	1018	.	A	C	.	PASS	.
ERCC-00034	1019	.	A	C	.	PASS	.
ERCC-00035	1052	.	A	C	.	PASS	.
ERCC-00035	1053	.	A	C	.	PASS	.
ERCC-00035	1054	.	A	C	.	PASS	.
ERCC-00035	1055	.	A	C	.	PASS	.
ERCC-00035	1056	.	A	C	.	PASS	.
ERCC-00035	1057	.	A	C	.	PASS	.
ERCC-00035	1058	.	A	C	.	PASS	.
ERCC-00035	1059	.	A	C	.	PASS	.
ERCC-00035	1060	.	A	C	.	PASS	.
ERCC-00035	1061	.	A	C	.	PASS	.
ERCC-00035	1062	.	A	C	.	PASS	.
ERCC-00035	1063	.	A	C	.	PASS	.
ERCC-00035	1064	.	A	C	.	PASS	.
ERCC-00035	1065	.	A	C	.	PASS	.
ERCC-00035	1066	.	A	C	.	PASS	.
ERCC-00035	1067	.	A	C	.	PASS	.
ERCC-00035	1068	.	A	C	.	PASS	.
ERCC-00035	1069	.	A	C	.	PASS	.
ERCC-00035	1070	.	A	C	.	PASS	.
ERCC-00035	1071	.	A	C	.	PASS	.
ERCC-00035	1072	.	A	C	.	PASS	.
ERCC-00035	1073	.	A	C	.	PASS	.
ERCC-00035	1074	.	A	C	.	PASS	.
ERCC-00035	1075	.	A	C	.	PASS	.
ERCC-00035	1076	.	A	C	.	PASS	.
ERCC-00035	1077	.	A	C	.	PASS	.
ERCC-00035	1078	.	A	C	.	PASS	.
ERCC-00035	1079	.	A	C	.	PASS	.
ERCC-00035	1080	.	A	C	.	PASS	.
ERCC-00035	1081	.	A	C	.	PASS	.
ERCC-00035	1082	.	A	C	.	PASS	.
ERCC-00035	1083	.	A	C	.	PASS	.
ERCC-00035	1084	.	A	C	.	PASS	.
ERCC-00035	1085	.	A	C	.	PASS	.
ERCC-00035	1086	.	A	C	.	PASS	.
ERCC-00035	1087	.	A	C	.	PASS	.
ERCC-00035	1088	.	A	C	.	PASS	.
ERCC-00035	1089	.	A	C	.	PASS	.
ERCC-00035	1090	.	A	C	.	PASS	.
ERCC-00035	1091	.	A	C	.	PASS	.
ERCC-00035	1092	.	A	C	.	PASS	.
ERCC-00035	1093	.	A	C	.	PASS	.
ERCC-00035	1094	.	A	C	.	PASS	.
ERCC-00035	1095	.	A	C	.	PASS	.
ERCC-00035	1096	.	A	C	.	PASS	.
ERCC-00035	1097	.	A	C	.	PASS	.
ERCC-00035	1098	.	A	C	.	PASS	.
ERCC-00035	1099	.	A	C	.	PASS	.
ERCC-00035	1100	.	A	C	.	PASS	.
ERCC-00035	1101	.	A	C	.	PASS	.
ERCC-00035	1102	.	A	C	.	PASS	.
ERCC-00035	1107	.	A	C	.	PASS	.
ERCC-00035	1108	.	A	C	.	PASS	.
ERCC-00035	1109	.	A	C	.	PASS	.
ERCC-00035	1110	.	A	C	.	PASS	.
ERCC-00035	1111	.	A	C	.	PASS	.
ERCC-00035	1112	.	A	C	.	PASS	.
ERCC-00035	1113	.	A	C	.	PASS	.
ERCC-00035	1114	.	A	C	.	PASS	.
ERCC-00035	1115	.	A	C	.	PASS	.
ERCC-00035	1116	.	A	C	.	PASS	.
ERCC-00035	1117	.	A	C	.	PASS	.
ERCC-00035	1118	.	A	C	.	PASS	.
ERCC-00035	1119	.	A	C	.	PASS	.
ERCC-00035	1120	.	A	C	.	PASS	.
ERCC-00035	1121	.	A	C	.	PASS	.
ERCC-00035	1122	.	A	C	.	PASS	.
ERCC-00035	1123	.	A	C	.	PASS	.
ERCC-00035	1124	.	A	C	.	PASS	.
ERCC-00035	1125	.	A	C	.	PASS	.
ERCC-00035	1126	.	A	C	.	PASS	.
ERCC-00035	1127	.	A	C	.	PASS	.
ERCC-00035	1128	.	A	C	.	PASS	.
ERCC-00035	1129	.	A	C	.	PASS	.
ERCC-00035	1130	.	A	C	.	PASS	.
ERCC-00039	665	.	A	C	.	PASS	.
ERCC-00039	666	.	A	C	.	PASS	.
ERCC-00039	667	.	A	C	.	PASS	.
ERCC-00039	668	.	A	C	.	PASS	.
ERCC-00039	669	.	A	C	.	PASS	.
ERCC-00039	670	.	A	C	.	PASS	.
ERCC-00039	671	.	A	C	.	PASS	.
ERCC-00039	672	.	A	C	.	PASS	.
ERCC-00039	673	.	A	C	.	PASS	.
ERCC-00039	674	.	A	C	.	PASS	.
ERCC-00039	675	.	A	C	.	PASS	.
ERCC-00039	676	.	A	C	.	PASS	.
ERCC-00039	677	.	A	C	.	PASS	.
ERCC-00039	678	.	A	C	.	PASS	.
ERCC-00039	679	.	A	C	.	PASS	.
ERCC-00039	680	.	A	C	.	PASS	.
ERCC-00039	681	.	A	C	.	PASS	.
ERCC-00039	682	.	A	C	.	PASS	.
ERCC-00039	683	.	A	C	.	PASS	.
ERCC-00039	684	.	A	C	.	PASS	.
ERCC-00039	685	.	A	C	.	PASS	.
ERCC-00039	686	.	A	C	.	PASS	.
ERCC-00039	687	.	A	C	.	PASS	.
ERCC-00039	688	.	A	C	.	PASS	.
ERCC-00039	689	.	A	C	.	PASS	.
ERCC-00039	690	.	A	C	.	PASS	.
ERCC-00039	691	.	A	C	.	PASS	.
ERCC-00039	692	.	A	C	.	PASS	.
ERCC-00039	693	.	A	C	.	PASS	.
ERCC-00039	694	.	A	C	.	PASS	.
ERCC-00039	695	.	A	C	.	PASS	.
ERCC-00039	696	.	A	C	.	PASS	.
ERCC-00039	697	.	A	C	.	PASS	.
ERCC-00039	698	.	A	C	.	PASS	.
ERCC-00039	699	.	A	C	.	PASS	.
ERCC-00039	700	.	A	C	.	PASS	.
ERCC-00039	701	.	A	C	.	PASS	.
ERCC-00039	702	.	A	C	.	PASS	.
ERCC-00039	703	.	A	C	.	PASS	.
ERCC-00039	704	.	A	C	.	PASS	.
ERCC-00039	705	.	A	C	.	PASS	.
ERCC-00039	706	.	A	C	.	PASS	.
ERCC-00039	707	.	A	C	.	PASS	.
ERCC-00039	708	.	A	C	.	PASS	.
ERCC-00039	709	.	A	C	.	PASS	.
ERCC-00039	710	.	A	C	.	PASS	.
ERCC-00039	711	.	A	C	.	PASS	.
ERCC-00039	712	.	A	C	.	PASS	.
ERCC-00039	713	.	A	C	.	PASS	.
ERCC-00039	714	.	A	C	.	PASS	.
ERCC-00039	715	.	A	C	.	PASS	.
ERCC-00039	717	.	A	C	.	PASS	.
ERCC-00039	718	.	A	C	.	PASS	.
ERCC-00039	719	.	A	C	.	PASS	.
ERCC-00039	720	.	A	C	.	PASS	.
ERCC-00039	721	.	A	C	.	PASS	.
ERCC-00039	722	.	A	C	.	PASS	.
ERCC-00039	723	.	A	C	.	PASS	.
ERCC-00039	724	.	A	C	.	PASS	.
ERCC-00039	725	.	A	C	.	PASS	.
ERCC-00039	726	.	A	C	.	PASS	.
ERCC-00039	727	.	A	C	.	PASS	.
ERCC-00039	728	.	A	C	.	PASS	.
ERCC-00039	729	.	A	C	.	PASS	.
ERCC-00039	730	.	A	C	.	PASS	.
ERCC-00039	731	.	A	C	.	PASS	.
ERCC-00039	732	.	A	C	.	PASS	.
ERCC-00039	733	.	A	C	.	PASS	.
ERCC-00039	734	.	A	C	.	PASS	.
ERCC-00039	735	.	A	C	.	PASS	.
ERCC-00039	736	.	A	C	.	PASS	.
ERCC-00039	737	.	A	C	.	PASS	.
ERCC-00039	738	.	A	C	.	PASS	.
ERCC-00039	739	.	A	C	.	PASS	.
ERCC-00039	740	.	A	C	.	PASS	.
ERCC-00040	667	.	A	C	.	PASS	.
ERCC-00040	668	.	A	C	.	PASS	.
ERCC-00040	669	.	A	C	.	PASS	.
ERCC-00040	670	.	A	C	.	PASS	.
ERCC-00040	671	.	A	C	.	PASS	.
ERCC-00040	672	.	A	C	.	PASS	.
ERCC-00040	673	.	A	C	.	PASS	.
ERCC-00040	674	.	A	C	.	PASS	.
ERCC-00040	675	.	A	C	.	PASS	.
ERCC-00040	676	.	A	C	.	PASS	.
ERCC-00040	677	.	A	C	.	PASS	.
ERCC-00040	678	.	A	C	.	PASS	.
ERCC-00040	679	.	A	C	.	PASS	.
ERCC-00040	680	.	A	C	.	PASS	.
ERCC-00040	681	.	A	C	.	PASS	.
ERCC-00040	682	.	A	C	.	PASS	.
ERCC-00040	683	.	A	C	.	PASS	.
ERCC-00040	684	.	A	C	.	PASS	.
ERCC-00040	685	.	A	C	.	PASS	.
ERCC-00040	686	.	A	C	.	PASS	.
ERCC-00040	687	.	A	C	.	PASS	.
ERCC-00040	688	.	A	C	.	PASS	.
ERCC-00040	689	.	A	C	.	PASS	.
ERCC-00040	690	.	A	C	.	PASS	.
ERCC-00040	691	.	A	C	.	PASS	.
ERCC-00040	692	.	A	C	.	PASS	.
ERCC-00040	693	.	A	C	.	PASS	.
ERCC-00040	694	.	A	C	.	PASS	.
ERCC-00040	695	.	A	C	.	PASS	.
ERCC-00040	696	.	A	C	.	PASS	.
ERCC-00040	697	.	A	C	.	PASS	.
ERCC-00040	698	.	A	C	.	PASS	.
ERCC-00040	699	.	A	C	.	PASS	.
ERCC-00040	700	.	A	C	.	PASS	.
ERCC-00040	701	.	A	C	.	PASS	.
ERCC-00040	702	.	A	C	.	PASS	.
ERCC-00040	703	.	A	C	.	PASS	.
ERCC-00040	704	.	A	C	.	PASS	.
ERCC-00040	705	.	A	C	.	PASS	.
ERCC-00040	706	.	A	C	.	PASS	.
ERCC-00040	707	.	A	C	.	PASS	.
ERCC-00040	708	.	A	C	.	PASS	.
ERCC-00040	709	.	A	C	.	PASS	.
ERCC-00040	710	.	A	C	.	PASS	.
ERCC-00040	711	.	A	C	.	PASS	.
ERCC-00040	712	.	A	C	.	PASS	.
ERCC-00040	713	.	A	C	.	PASS	.
ERCC-00040	714	.	A	C	.	PASS	.
ERCC-00040	715	.	A	C	.	PASS	.
ERCC-00040	716	.	A	C	.	PASS	.
ERCC-00040	717	.	A	C	.	PASS	.
ERCC-00040	721	.	A	C	.	PASS	.
ERCC-00040	722	.	A	C	.	PASS	.
ERCC-00040	723	.	A	C	.	PASS	.
ERCC-00040	724	.	A	C	.	PASS	.
ERCC-00040	725	.	A	C	.	PASS	.
ERCC-00040	726	.	A	C	.	PASS	.
ERCC-00040	727	.	A	C	.	PASS	.
ERCC-00040	728	.	A	C	.	PASS	.
ERCC-00040	729	.	A	C	.	PASS	.
ERCC-00040	730	.	A	C	.	PASS	.
ERCC-00040	731	.	A	C	.	PASS	.
ERCC-00040	732	.	A	C	.	PASS	.
ERCC-00040	733	.	A	C	.	PASS	.
ERCC-00040	734	.	A	C	.	PASS	.
ERCC-00040	735	.	A	C	.	PASS	.
ERCC-00040	736	.	A	C	.	PASS	.
ERCC-00040	737	.	A	C	.	PASS	.
ERCC-00040	738	.	A	C	.	PASS	.
ERCC-00040	739	.	A	C	.	PASS	.
ERCC-00040	740	.	A	C	.	PASS	.
ERCC-00040	741	.	A	C	.	PASS	.
ERCC-00040	742	.	A	C	.	PASS	.
ERCC-00040	743	.	A	C	.	PASS	.
ERCC-00040	744	.	A	C	.	PASS	.
ERCC-00041	1039	.	A	C	.	PASS	.
ERCC-00041	1040	.	A	C	.	PASS	.
ERCC-00041	1041	.	A	C	.	PASS	.
ERCC-00041	1042	.	A	C	.	PASS	.
ERCC-00041	1043	.	A	C	.	PASS	.
ERCC-00041	1044	.	A	C	.	PASS	.
ERCC-00041	1045	.	A	C	.	PASS	.
ERCC-00041	1046	.	A	C	.	PASS	.
ERCC-00041	1047	.	A	C	.	PASS	.
ERCC-00041	1048	.	A	C	.	PASS	.
ERCC-00041	1049	.	A	C	.	PASS	.
ERCC-00041	1050	.	A	C	.	PASS	.
ERCC-00041	1051	.	A	C	.	PASS	.
ERCC-00041	1052	.	A	C	.	PASS	.
ERCC-00041	1053	.	A	C	.	PASS	.
ERCC-00041	1054	.	A	C	.	PASS	.
ERCC-00041	1055	.	A	C	.	PASS	.
ERCC-00041	1056	.	A	C	.	PASS	.
ERCC-00041	1057	.	A	C	.	PASS	.
ERCC-00041	1058	.	A	C	.	PASS	.
ERCC-00041	1059	.	A	C	.	PASS	.
ERCC-00041	1060	.	A	C	.	PASS	.
ERCC-00041	1061	.	A	C	.	PASS	.
ERCC-00041	1062	.	A	C	.	PASS	.
ERCC-00041	1063	.	A	C	.	PASS	.
ERCC-00041	1064	.	A	C	.	PASS	.
ERCC-00041	1065	.	A	C	.	PASS	.
ERCC-00041	1066	.	A	C	.	PASS	.
ERCC-00041	1067	.	A	C	.	PASS	.
ERCC-00041	1068	.	A	C	.	PASS	.
ERCC-00041	1069	.	A	C	.	PASS	.
ERCC-00041	1070	.	A	C	.	PASS	.
ERCC-00041	1071	.	A	C	.	PASS	.
ERCC-00041	1072	.	A	C	.	PASS	.
ERCC-00041	1073	.	A	C	.	PASS	.
ERCC-00041	1074	.	A	C	.	PASS	.
ERCC-00041	1075	.	A	C	.	PASS	.
ERCC-00041	1076	.	A	C	.	PASS	.
ERCC-00041	1077	.	A	C	.	PASS	.
ERCC-00041	1078	.	A	C	.	PASS	.
ERCC-00041	1079	.	A	C	.	PASS	.
ERCC-00041	1080	.	A	C	.	PASS	.
ERCC-00041	1081	.	A	C	.	PASS	.
ERCC-00041	1082	.	A	C	.	PASS	.
ERCC-00041	1083	.	A	C	.	PASS	.
ERCC-00041	1084	.	A	C	.	PASS	.
ERCC-00041	1085	.	A	C	.	PASS	.
ERCC-00041	1086	.	A	C	.	PASS	.
ERCC-00041	1087	.	A	C	.	PASS	.
ERCC-00041	1088	.	A	C	.	PASS	.
ERCC-00041	1089	.	A	C	.	PASS	.
ERCC-00041	1102	.	A	C	.	PASS	.
ERCC-00041	1103	.	A	C	.	PASS	.
ERCC-00041	1104	.	A	C	.	PASS	.
ERCC-00041	1105	.	A	C	.	PASS	.
ERCC-00041	1106	.	A	C	.	PASS	.
ERCC-00041	1107	.	A	C	.	PASS	.
ERCC-00041	1108	.	A	C	.	PASS	.
ERCC-00041	1109	.	A	C	.	PASS	.
ERCC-00041	1110	.	A	C	.	PASS	.
ERCC-00041	1111	.	A	C	.	PASS	.
ERCC-00041	1112	.	A	C	.	PASS	.
ERCC-00041	1113	.	A	C	.	PASS	.
ERCC-00041	1114	.	A	C	.	PASS	.
ERCC-00041	1115	.	A	C	.	PASS	.
ERCC-00041	1116	.	A	C	.	PASS	.
ERCC-00041	1117	.	A	C	.	PASS	.
ERCC-00041	1118	.	A	C	.	PASS	.
ERCC-00041	1119	.	A	C	.	PASS	.
ERCC-00041	1120	.	A	C	.	PASS	.
ERCC-00041	1121	.	A	C	.	PASS	.
ERCC-00041	1122	.	A	C	.	PASS	.
ERCC-00041	1123	.	A	C	.	PASS	.
ERCC-00042	1	.	A	C	.	PASS	.
ERCC-00042	5	.	A	C	.	PASS	.
ERCC-00042	941	.	A	C	.	PASS	.
ERCC-00042	942	.	A	C	.	PASS	.
ERCC-00042	943	.	A	C	.	PASS	.
ERCC-00042	944	.	A	C	.	PASS	.
ERCC-00042	945	.	A	C	.	PASS	.
ERCC-00042	946	.	A	C	.	PASS	.
ERCC-00042	947	.	A	C	.	PASS	.
ERCC-00042	948	.	A	C	.	PASS	.
ERCC-00042	949	.	A	C	.	PASS	.
ERCC-00042	950	.	A	C	.	PASS	.
ERCC-00042	951	.	A	C	.	PASS	.
ERCC-00042	952	.	A	C	.	PASS	.
ERCC-00042	953	.	A	C	.	PASS	.
ERCC-00042	954	.	A	C	.	PASS	.
ERCC-00042	955	.	A	C	.	PASS	.
ERCC-00042	956	.	A	C	.	PASS	.
ERCC-00042	957	.	A	C	.	PASS	.
ERCC-00042	958	.	A	C	.	PASS	.
ERCC-00042	959	.	A	C	.	PASS	.
ERCC-00042	960	.	A	C	.	PASS	.
ERCC-00042	961	.	A	C	.	PASS	.
ERCC-00042	962	.	A	C	.	PASS	.
ERCC-00042	963	.	A	C	.	PASS	.
ERCC-00042	964	.	A	C	.	PASS	.
ERCC-00042	965	.	A	C	.	PASS	.
ERCC-00042	966	.	A	C	.	PASS	.
ERCC-00042	967	.	A	C	.	PASS	.
ERCC-00042	968	.	A	C	.	PASS	.
ERCC-00042	969	.	A	C	.	PASS	.
ERCC-00042	970	.	A	C	.	PASS	.
ERCC-00042	971	.	A	C	.	PASS	.
ERCC-00042	972	.	A	C	.	PASS	.
ERCC-00042	973	.	A	C	.	PASS	.
ERCC-00042	974	.	A	C	.	PASS	.
ERCC-00042	975	.	A	C	.	PASS	.
ERCC-00042	976	.	A	C	.	PASS	.
ERCC-00042	977	.	A	C	.	PASS	.
ERCC-00042	978	.	A	C	.	PASS	.
ERCC-00042	979	.	A	C	.	PASS	.
ERCC-00042	980	.	A	C	.	PASS	.
ERCC-00042	981	.	A	C	.	PASS	.
ERCC-00042	982	.	A	C	.	PASS	.
ERCC-00042	983	.	A	C	.	PASS	.
ERCC-00042	984	.	A	C	.	PASS	.
ERCC-00042	985	.	A	C	.	PASS	.
ERCC-00042	986	.	A	C	.	PASS	.
ERCC-00042	987	.	A	C	.	PASS	.
ERCC-00042	988	.	A	C	.	PASS	.
ERCC-00042	989	.	A	C	.	PASS	.
ERCC-00042	990	.	A	C	.	PASS	.
ERCC-00042	991	.	A	C	.	PASS	.
ERCC-00042	1000	.	A	C	.	PASS	.
ERCC-00042	1001	.	A	C	.	PASS	.
ERCC-00042	1002	.	A	C	.	PASS	.
ERCC-00042	1003	.	A	C	.	PASS	.
ERCC-00042	1004	.	A	C	.	PASS	.
ERCC-00042	1005	.	A	C	.	PASS	.
ERCC-00042	1006	.	A	C	.	PASS	.
ERCC-00042	1007	.	A	C	.	PASS	.
ERCC-00042	1008	.	A	C	.	PASS	.
ERCC-00042	1009	.	A	C	.	PASS	.
ERCC-00042	1010	.	A	C	.	PASS	.
ERCC-00042	1011	.	A	C	.	PASS	.
ERCC-00042	1012	.	A	C	.	PASS	.
ERCC-00042	1013	.	A	C	.	PASS	.
ERCC-00042	1014	.	A	C	.	PASS	.
ERCC-00042	1015	.	A	C	.	PASS	.
ERCC-00042	1016	.	A	C	.	PASS	.
ERCC-00042	1017	.	A	C	.	PASS	.
ERCC-00042	1018	.	A	C	.	PASS	.
ERCC-00042	1019	.	A	C	.	PASS	.
ERCC-00042	1020	.	A	C	.	PASS	.
ERCC-00042	1021	.	A	C	.	PASS	.
ERCC-00042	1022	.	A	C	.	PASS	.
ERCC-00042	1023	.	A	C	.	PASS	.
ERCC-00043	584	.	A	C	.	PASS	.
ERCC-00043	943	.	A	C	.	PASS	.
ERCC-00043	944	.	A	C	.	PASS	.
ERCC-00043	945	.	A	C	.	PASS	.
ERCC-00043	946	.	A	C	.	PASS	.
ERCC-00043	947	.	A	C	.	PASS	.
ERCC-00043	948	.	A	C	.	PASS	.
ERCC-00043	949	.	A	C	.	PASS	.
ERCC-00043	950	.	A	C	.	PASS	.
ERCC-00043	951	.	A	C	.	PASS	.
ERCC-00043	952	.	A	C	.	PASS	.
ERCC-00043	953	.	A	C	.	PASS	.
ERCC-00043	954	.	A	C	.	PASS	.
ERCC-00043	955	.	A	C	.	PASS	.
ERCC-00043	956	.	A	C	.	PASS	.
ERCC-00043	957	.	A	C	.	PASS	.
ERCC-00043	958	.	A	C	.	PASS	.
ERCC-00043	959	.	A	C	.	PASS	.
ERCC-00043	960	.	A	C	.	PASS	.
ERCC-00043	961	.	A	C	.	PASS	.
ERCC-00043	962	.	A	C	.	PASS	.
ERCC-00043	963	.	A	C	.	PASS	.
ERCC-00043	964	.	A	C	.	PASS	.
ERCC-00043	965	.	A	C	.	PASS	.
ERCC-00043	966	.	A	C	.	PASS	.
ERCC-00043	967	.	A	C	.	PASS	.
ERCC-00043	968	.	A	C	.	PASS	.
ERCC-00043	969	.	A	C	.	PASS	.
ERCC-00043	970	.	A	C	.	PASS	.
ERCC-00043	971	.	A	C	.	PASS	.
ERCC-00043	972	.	A	C	.	PASS	.
ERCC-00043	973	.	A	C	.	PASS	.
ERCC-00043	974	.	A	C	.	PASS	.
ERCC-00043	975	.	A	C	.	PASS	.
ERCC-00043	976	.	A	C	.	PASS	.
ERCC-00043	977	.	A	C	.	PASS	.
ERCC-00043	978	.	A	C	.	PASS	.
ERCC-00043	979	.	A	C	.	PASS	.
ERCC-00043	980	.	A	C	.	PASS	.
ERCC-00043	981	.	A	C	.	PASS	.
ERCC-00043	982	.	A	C	.	PASS	.
ERCC-00043	983	.	A	C	.	PASS	.
ERCC-00043	984	.	A	C	.	PASS	.
ERCC-00043	985	.	A	C	.	PASS	.
ERCC-00043	986	.	A	C	.	PASS	.
ERCC-00043	987	.	A	C	.	PASS	.
ERCC-00043	988	.	A	C	.	PASS	.
ERCC-00043	989	.	A	C	.	PASS	.
ERCC-00043	990	.	A	C	.	PASS	.
ERCC-00043	991	.	A	C	.	PASS	.
ERCC-00043	992	.	A	C	.	PASS	.
ERCC-00043	993	.	A	C	.	PASS	.
ERCC-00043	1000	.	A	C	.	PASS	.
ERCC-00043	1001	.	A	C	.	PASS	.
ERCC-00043	1002	.	A	C	.	PASS	.
ERCC-00043	1003	.	A	C	.	PASS	.
ERCC-00043	1004	.	A	C	.	PASS	.
ERCC-00043	1005	.	A	C	.	PASS	.
ERCC-00043	1006	.	A	C	.	PASS	.
ERCC-00043	1007	.	A	C	.	PASS	.
ERCC-00043	1008	.	A	C	.	PASS	.
ERCC-00043	1009	.	A	C	.	PASS	.
ERCC-00043	1010	.	A	C	.	PASS	.
ERCC-00043	1011	.	A	C	.	PASS	.
ERCC-00043	1012	.	A	C	.	PASS	.
ERCC-00043	1013	.	A	C	.	PASS	.
ERCC-00043	1014	.	A	C	.	PASS	.
ERCC-00043	1015	.	A	C	.	PASS	.
ERCC-00043	1016	.	A	C	.	PASS	.
ERCC-00043	1017	.	A	C	.	PASS	.
ERCC-00043	1018	.	A	C	.	PASS	.
ERCC-00043	1019	.	A	C	.	PASS	.
ERCC-00043	1020	.	A	C	.	PASS	.
ERCC-00043	1021	.	A	C	.	PASS	.
ERCC-00043	1022	.	A	C	.	PASS	.
ERCC-00043	1023	.	A	C	.	PASS	.
ERCC-00044	1082	.	A	C	.	PASS	.
ERCC-00044	1083	.	A	C	.	PASS	.
ERCC-00044	1084	.	A	C	.	PASS	.
ERCC-00044	1085	.	A	C	.	PASS	.
ERCC-00044	1086	.	A	C	.	PASS	.
ERCC-00044	1087	.	A	C	.	PASS	.
ERCC-00044	1088	.	A	C	.	PASS	.
ERCC-00044	1089	.	A	C	.	PASS	.
ERCC-00044	1090	.	A	C	.	PASS	.
ERCC-00044	1091	.	A	C	.	PASS	.
ERCC-00044	1092	.	A	C	.	PASS	.
ERCC-00044	1093	.	A	C	.	PASS	.
ERCC-00044	1094	.	A	C	.	PASS	.
ERCC-00044	1095	.	A	C	.	PASS	.
ERCC-00044	1096	.	A	C	.	PASS	.
ERCC-00044	1097	.	A	C	.	PASS	.
ERCC-00044	1098	.	A	C	.	PASS	.
ERCC-00044	1099	.	A	C	.	PASS	.
ERCC-00044	1100	.	A	C	.	PASS	.
ERCC-00044	1101	.	A	C	.	PASS	.
ERCC-00044	1102	.	A	C	.	PASS	.
ERCC-00044	1103	.	A	C	.	PASS	.
ERCC-00044	1104	.	A	C	.	PASS	.
ERCC-00044	1105	.	A	C	.	PASS	.
ERCC-00044	1106	.	A	C	.	PASS	.
ERCC-00044	1107	.	A	C	.	PASS	.
ERCC-00044	1108	.	A	C	.	PASS	.
ERCC-00044	1109	.	A	C	.	PASS	.
ERCC-00044	1110	.	A	C	.	PASS	.
ERCC-00044	1111	.	A	C	.	PASS	.
ERCC-00044	1112	.	A	C	.	PASS	.
ERCC-00044	1113	.	A	C	.	PASS	.
ERCC-00044	1114	.	A	C	.	PASS	.
ERCC-00044	1115	.	A	C	.	PASS	.
ERCC-00044	1116	.	A	C	.	PASS	.
ERCC-00044	1117	.	A	C	.	PASS	.
ERCC-00044	1118	.	A	C	.	PASS	.
ERCC-00044	1119	.	A	C	.	PASS	.
ERCC-00044	1120	.	A	C	.	PASS	.
ERCC-00044	1121	.	A	C	.	PASS	.
ERCC-00044	1122	.	A	C	.	PASS	.
ERCC-00044	1123	.	A	C	.	PASS	.
ERCC-00044	1124	.	A	C	.	PASS	.
ERCC-00044	1125	.	A	C	.	PASS	.
ERCC-00044	1126	.	A	C	.	PASS	.
ERCC-00044	1127	.	A	C	.	PASS	.
ERCC-00044	1128	.	A	C	.	PASS	.
ERCC-00044	1129	.	A	C	.	PASS	.
ERCC-00044	1130	.	A	C	.	PASS	.
ERCC-00044	1131	.	A	C	.	PASS	.
ERCC-00044	1132	.	A	C	.	PASS	.
ERCC-00044	1133	.	A	C	.	PASS	.
ERCC-00044	1134	.	A	C	.	PASS	.
ERCC-00044	1135	.	A	C	.	PASS	.
ERCC-00044	1136	.	A	C	.	PASS	.
ERCC-00044	1137	.	A	C	.	PASS	.
ERCC-00044	1138	.	A	C	.	PASS	.
ERCC-00044	1139	.	A	C	.	PASS	.
ERCC-00044	1140	.	A	C	.	PASS	.
ERCC-00044	1141	.	A	C	.	PASS	.
ERCC-00044	1142	.	A	C	.	PASS	.
ERCC-00044	1143	.	A	C	.	PASS	.
ERCC-00044	1144	.	A	C	.	PASS	.
ERCC-00044	1145	.	A	C	.	PASS	.
ERCC-00044	1146	.	A	C	.	PASS	.
ERCC-00044	1147	.	A	C	.	PASS	.
ERCC-00044	1148	.	A	C	.	PASS	.
ERCC-00044	1149	.	A	C	.	PASS	.
ERCC-00044	1150	.	A	C	.	PASS	.
ERCC-00044	1151	.	A	C	.	PASS	.
ERCC-00044	1152	.	A	C	.	PASS	.
ERCC-00044	1153	.	A	C	.	PASS	.
ERCC-00044	1154	.	A	C	.	PASS	.
ERCC-00044	1155	.	A	C	.	PASS	.
ERCC-00044	1156	.	A	C	.	PASS	.
ERCC-00046	445	.	A	C	.	PASS	.
ERCC-00046	446	.	A	C	.	PASS	.
ERCC-00046	447	.	A	C	.	PASS	.
ERCC-00046	448	.	A	C	.	PASS	.
ERCC-00046	449	.	A	C	.	PASS	.
ERCC-00046	450	.	A	C	.	PASS	.
ERCC-00046	451	.	A	C	.	PASS	.
ERCC-00046	452	.	A	C	.	PASS	.
ERCC-00046	453	.	A	C	.	PASS	.
ERCC-00046	454	.	A	C	.	PASS	.
ERCC-00046	455	.	A	C	.	PASS	.
ERCC-00046	456	.	A	C	.	PASS	.
ERCC-00046	457	.	A	C	.	PASS	.
ERCC-00046	458	.	A	C	.	PASS	.
ERCC-00046	459	.	A	C	.	PASS	.
ERCC-00046	460	.	A	C	.	PASS	.
ERCC-00046	461	.	A	C	.	PASS	.
ERCC-00046	462	.	A	C	.	PASS	.
ERCC-00046	463	.	A	C	.	PASS	.
ERCC-00046	464	.	A	C	.	PASS	.
ERCC-00046	465	.	A	C	.	PASS	.
ERCC-00046	466	.	A	C	.	PASS	.
ERCC-00046	467	.	A	C	.	PASS	.
ERCC-00046	468	.	A	C	.	PASS	.
ERCC-00046	469	.	A	C	.	PASS	.
ERCC-00046	470	.	A	C	.	PASS	.
ERCC-00046	471	.	A	C	.	PASS	.
ERCC-00046	472	.	A	C	.	PASS	.
ERCC-00046	473	.	A	C	.	PASS	.
ERCC-00046	474	.	A	C	.	PASS	.
ERCC-00046	475	.	A	C	.	PASS	.
ERCC-00046	476	.	A	C	.	PASS	.
ERCC-00046	477	.	A	C	.	PASS	.
ERCC-00046	478	.	A	C	.	PASS	.
ERCC-00046	479	.	A	C	.	PASS	.
ERCC-00046	480	.	A	C	.	PASS	.
ERCC-00046	481	.	A	C	.	PASS	.
ERCC-00046	482	.	A	C	.	PASS	.
ERCC-00046	483	.	A	C	.	PASS	.
ERCC-00046	484	.	A	C	.	PASS	.
ERCC-00046	485	.	A	C	.	PASS	.
ERCC-00046	486	.	A	C	.	PASS	.
ERCC-00046	487	.	A	C	.	PASS	.
ERCC-00046	488	.	A	C	.	PASS	.
ERCC-00046	489	.	A	C	.	PASS	.
ERCC-00046	490	.	A	C	.	PASS	.
ERCC-00046	491	.	A	C	.	PASS	.
ERCC-00046	492	.	A	C	.	PASS	.
ERCC-00046	493	.	A	C	.	PASS	.
ERCC-00046	494	.	A	C	.	PASS	.
ERCC-00046	495	.	A	C	.	PASS	.
ERCC-00046	499	.	A	C	.	PASS	.
ERCC-00046	500	.	A	C	.	PASS	.
ERCC-00046	501	.	A	C	.	PASS	.
ERCC-00046	502	.	A	C	.	PASS	.
ERCC-00046	503	.	A	C	.	PASS	.
ERCC-00046	504	.	A	C	.	PASS	.
ERCC-00046	505	.	A	C	.	PASS	.
ERCC-00046	506	.	A	C	.	PASS	.
ERCC-00046	507	.	A	C	.	PASS	.
ERCC-00046	508	.	A	C	.	PASS	.
ERCC-00046	509	.	A	C	.	PASS	.
ERCC-00046	510	.	A	C	.	PASS	.
ERCC-00046	511	.	A	C	.	PASS	.
ERCC-00046	512	.	A	C	.	PASS	.
ERCC-00046	513	.	A	C	.	PASS	.
ERCC-00046	514	.	A	C	.	PASS	.
ERCC-00046	515	.	A	C	.	PASS	.
ERCC-00046	516	.	A	C	.	PASS	.
ERCC-00046	517	.	A	C	.	PASS	.
ERCC-00046	518	.	A	C	.	PASS	.
ERCC-00046	519	.	A	C	.	PASS	.
ERCC-00046	520	.	A	C	.	PASS	.
ERCC-00046	521	.	A	C	.	PASS	.
ERCC-00046	522	.	A	C	.	PASS	.
ERCC-00048	904	.	A	C	.	PASS	.
ERCC-00048	905	.	A	C	.	PASS	.
ERCC-00048	906	.	A	C	.	PASS	.
ERCC-00048	907	.	A	C	.	PASS	.
ERCC-00048	908	.	A	C	.	PASS	.
ERCC-00048	909	.	A	C	.	PASS	.
ERCC-00048	910	.	A	C	.	PASS	.
ERCC-00048	911	.	A	C	.	PASS	.
ERCC-00048	912	.	A	C	.	PASS	.
ERCC-00048	913	.	A	C	.	PASS	.
ERCC-00048	914	.	A	C	.	PASS	.
ERCC-00048	915	.	A	C	.	PASS	.
ERCC-00048	916	.	A	C	.	PASS	.
ERCC-00048	917	.	A	C	.	PASS	.
ERCC-00048	918	.	A	C	.	PASS	.
ERCC-00048	919	.	A	C	.	PASS	.
ERCC-00048	920	.	A	C	.	PASS	.
ERCC-00048	921	.	A	C	.	PASS	.
ERCC-00048	922	.	A	C	.	PASS	.
ERCC-00048	923	.	A	C	.	PASS	.
ERCC-00048	924	.	A	C	.	PASS	.
ERCC-00048	925	.	A	C	.	PASS	.
ERCC-00048	926	.	A	C	.	PASS	.
ERCC-00048	927	.	A	C	.	PASS	.
ERCC-00048	928	.	A	C	.	PASS	.
ERCC-00048	929	.	A	C	.	PASS	.
ERCC-00048	930	.	A	C	.	PASS	.
ERCC-00048	931	.	A	C	.	PASS	.
ERCC-00048	932	.	A	C	.	PASS	.
ERCC-00048	933	.	A	C	.	PASS	.
ERCC-00048	934	.	A	C	.	PASS	.
ERCC-00048	935	.	A	C	.	PASS	.
ERCC-00048	936	.	A	C	.	PASS	.
ERCC-00048	937	.	A	C	.	PASS	.
ERCC-00048	938	.	A	C	.	PASS	.
ERCC-00048	939	.	A	C	.	PASS	.
ERCC-00048	940	.	A	C	.	PASS	.
ERCC-00048	941	.	A	C	.	PASS	.
ERCC-00048	942	.	A	C	.	PASS	.
ERCC-00048	943	.	A	C	.	PASS	.
ERCC-00048	944	.	A	C	.	PASS	.
ERCC-00048	945	.	A	C	.	PASS	.
ERCC-00048	946	.	A	C	.	PASS	.
ERCC-00048	947	.	A	C	.	PASS	.
ERCC-00048	948	.	A	C	.	PASS	.
ERCC-00048	949	.	A	C	.	PASS	.
ERCC-00048	950	.	A	C	.	PASS	.
ERCC-00048	951	.	A	C	.	PASS	.
ERCC-00048	952	.	A	C	.	PASS	.
ERCC-00048	953	.	A	C	.	PASS	.
ERCC-00048	954	.	A	C	.	PASS	.
ERCC-00048	969	.	A	C	.	PASS	.
ERCC-00048	970	.	A	C	.	PASS	.
ERCC-00048	971	.	A	C	.	PASS	.
ERCC-00048	972	.	A	C	.	PASS	.
ERCC-00048	973	.	A	C	.	PASS	.
ERCC-00048	974	.	A	C	.	PASS	.
ERCC-00048	975	.	A	C	.	PASS	.
ERCC-00048	976	.	A	C	.	PASS	.
ERCC-00048	977	.	A	C	.	PASS	.
ERCC-00048	978	.	A	C	.	PASS	.
ERCC-00048	979	.	A	C	.	PASS	.
ERCC-00048	980	.	A	C	.	PASS	.
ERCC-00048	981	.	A	C	.	PASS	.
ERCC-00048	982	.	A	C	.	PASS	.
ERCC-00048	983	.	A	C	.	PASS	.
ERCC-00048	984	.	A	C	.	PASS	.
ERCC-00048	985	.	A	C	.	PASS	.
ERCC-00048	986	.	A	C	.	PASS	.
ERCC-00048	987	.	A	C	.	PASS	.
ERCC-00048	988	.	A	C	.	PASS	.
ERCC-00048	989	.	A	C	.	PASS	.
ERCC-00048	990	.	A	C	.	PASS	.
ERCC-00048	991	.	A	C	.	PASS	.
ERCC-00048	992	.	A	C	.	PASS	.
ERCC-00051	198	.	A	C	.	PASS	.
ERCC-00051	199	.	A	C	.	PASS	.
ERCC-00051	200	.	A	C	.	PASS	.
ERCC-00051	201	.	A	C	.	PASS	.
ERCC-00051	202	.	A	C	.	PASS	.
ERCC-00051	203	.	A	C	.	PASS	.
ERCC-00051	204	.	A	C	.	PASS	.
ERCC-00051	205	.	A	C	.	PASS	.
ERCC-00051	206	.	A	C	.	PASS	.
ERCC-00051	207	.	A	C	.	PASS	.
ERCC-00051	208	.	A	C	.	PASS	.
ERCC-00051	209	.	A	C	.	PASS	.
ERCC-00051	210	.	A	C	.	PASS	.
ERCC-00051	211	.	A	C	.	PASS	.
ERCC-00051	212	.	A	C	.	PASS	.
ERCC-00051	213	.	A	C	.	PASS	.
ERCC-00051	214	.	A	C	.	PASS	.
ERCC-00051	215	.	A	C	.	PASS	.
ERCC-00051	216	.	A	C	.	PASS	.
ERCC-00051	217	.	A	C	.	PASS	.
ERCC-00051	218	.	A	C	.	PASS	.
ERCC-00051	219	.	A	C	.	PASS	.
ERCC-00051	220	.	A	C	.	PASS	.
ERCC-00051	221	.	A	C	.	PASS	.
ERCC-00051	222	.	A	C	.	PASS	.
ERCC-00051	223	.	A	C	.	PASS	.
ERCC-00051	224	.	A	C	.	PASS	.
ERCC-00051	225	.	A	C	.	PASS	.
ERCC-00051	226	.	A	C	.	PASS	.
ERCC-00051	227	.	A	C	.	PASS	.
ERCC-00051	228	.	A	C	.	PASS	.
ERCC-00051	229	.	A	C	.	PASS	.
ERCC-00051	230	.	A	C	.	PASS	.
ERCC-00051	231	.	A	C	.	PASS	.
ERCC-00051	232	.	A	C	.	PASS	.
ERCC-00051	233	.	A	C	.	PASS	.
ERCC-00051	234	.	A	C	.	PASS	.
ERCC-00051	235	.	A	C	.	PASS	.
ERCC-00051	236	.	A	C	.	PASS	.
ERCC-00051	237	.	A	C	.	PASS	.
ERCC-00051	238	.	A	C	.	PASS	.
ERCC-00051	239	.	A	C	.	PASS	.
ERCC-00051	240	.	A	C	.	PASS	.
ERCC-00051	241	.	A	C	.	PASS	.
ERCC-00051	242	.	A	C	.	PASS	.
ERCC-00051	243	.	A	C	.	PASS	.
ERCC-00051	244	.	A	C	.	PASS	.
ERCC-00051	245	.	A	C	.	PASS	.
ERCC-00051	246	.	A	C	.	PASS	.
ERCC-00051	247	.	A	C	.	PASS	.
ERCC-00051	248	.	A	C	.	PASS	.
ERCC-00051	251	.	A	C	.	PASS	.
ERCC-00051	252	.	A	C	.	PASS	.
ERCC-00051	253	.	A	C	.	PASS	.
ERCC-00051	254	.	A	C	.	PASS	.
ERCC-00051	255	.	A	C	.	PASS	.
ERCC-00051	256	.	A	C	.	PASS	.
ERCC-00051	257	.	A	C	.	PASS	.
ERCC-00051	258	.	A	C	.	PASS	.
ERCC-00051	259	.	A	C	.	PASS	.
ERCC-00051	260	.	A	C	.	PASS	.
ERCC-00051	261	.	A	C	.	PASS	.
ERCC-00051	262	.	A	C	.	PASS	.
ERCC-00051	263	.	A	C	.	PASS	.
ERCC-00051	264	.	A	C	.	PASS	.
ERCC-00051	265	.	A	C	.	PASS	.
ERCC-00051	266	.	A	C	.	PASS	.
ERCC-00051	267	.	A	C	.	PASS	.
ERCC-00051	268	.	A	C	.	PASS	.
ERCC-00051	269	.	A	C	.	PASS	.
ERCC-00051	270	.	A	C	.	PASS	.
ERCC-00051	271	.	A	C	.	PASS	.
ERCC-00051	272	.	A	C	.	PASS	.
ERCC-00051	273	.	A	C	.	PASS	.
ERCC-00051	274	.	A	C	.	PASS	.
ERCC-00053	941	.	A	C	.	PASS	.
ERCC-00053	942	.	A	C	.	PASS	.
ERCC-00053	943	.	A	C	.	PASS	.
ERCC-00053	944	.	A	C	.	PASS	.
ERCC-00053	945	.	A	C	.	PASS	.
ERCC-00053	946	.	A	C	.	PASS	.
ERCC-00053	947	.	A	C	.	PASS	.
ERCC-00053	948	.	A	C	.	PASS	.
ERCC-00053	949	.	A	C	.	PASS	.
ERCC-00053	950	.	A	C	.	PASS	.
ERCC-00053	951	.	A	C	.	PASS	.
ERCC-00053	952	.	A	C	.	PASS	.
ERCC-00053	953	.	A	C	.	PASS	.
ERCC-00053	954	.	A	C	.	PASS	.
ERCC-00053	955	.	A	C	.	PASS	.
ERCC-00053	956	.	A	C	.	PASS	.
ERCC-00053	957	.	A	C	.	PASS	.
ERCC-00053	958	.	A	C	.	PASS	.
ERCC-00053	959	.	A	C	.	PASS	.
ERCC-00053	960	.	A	C	.	PASS	.
ERCC-00053	961	.	A	C	.	PASS	.
ERCC-00053	962	.	A	C	.	PASS	.
ERCC-00053	963	.	A	C	.	PASS	.
ERCC-00053	964	.	A	C	.	PASS	.
ERCC-00053	965	.	A	C	.	PASS	.
ERCC-00053	966	.	A	C	.	PASS	.
ERCC-00053	967	.	A	C	.	PASS	.
ERCC-00053	968	.	A	C	.	PASS	.
ERCC-00053	969	.	A	C	.	PASS	.
ERCC-00053	970	.	A	C	.	PASS	.
ERCC-00053	971	.	A	C	.	PASS	.
ERCC-00053	972	.	A	C	.	PASS	.
ERCC-00053	973	.	A	C	.	PASS	.
ERCC-00053	974	.	A	C	.	PASS	.
ERCC-00053	975	.	A	C	.	PASS	.
ERCC-00053	976	.	A	C	.	PASS	.
ERCC-00053	977	.	A	C	.	PASS	.
ERCC-00053	978	.	A	C	.	PASS	.
ERCC-00053	979	.	A	C	.	PASS	.
ERCC-00053	980	.	A	C	.	PASS	.
ERCC-00053	981	.	A	C	.	PASS	.
ERCC-00053	982	.	A	C	.	PASS	.
ERCC-00053	983	.	A	C	.	PASS	.
ERCC-00053	984	.	A	C	.	PASS	.
ERCC-00053	985	.	A	C	.	PASS	.
ERCC-00053	986	.	A	C	.	PASS	.
ERCC-00053	987	.	A	C	.	PASS	.
ERCC-00053	988	.	A	C	.	PASS	.
ERCC-00053	989	.	A	C	.	PASS	.
ERCC-00053	990	.	A	C	.	PASS	.
ERCC-00053	991	.	A	C	.	PASS	.
ERCC-00053	1000	.	A	C	.	PASS	.
ERCC-00053	1001	.	A	C	.	PASS	.
ERCC-00053	1002	.	A	C	.	PASS	.
ERCC-00053	1003	.	A	C	.	PASS	.
ERCC-00053	1004	.	A	C	.	PASS	.
ERCC-00053	1005	.	A	C	.	PASS	.
ERCC-00053	1006	.	A	C	.	PASS	.
ERCC-00053	1007	.	A	C	.	PASS	.
ERCC-00053	1008	.	A	C	.	PASS	.
ERCC-00053	1009	.	A	C	.	PASS	.
ERCC-00053	1010	.	A	C	.	PASS	.
ERCC-00053	1011	.	A	C	.	PASS	.
ERCC-00053	1012	.	A	C	.	PASS	.
ERCC-00053	1013	.	A	C	.	PASS	.
ERCC-00053	1014	.	A	C	.	PASS	.
ERCC-00053	1015	.	A	C	.	PASS	.
ERCC-00053	1016	.	A	C	.	PASS	.
ERCC-00053	1017	.	A	C	.	PASS	.
ERCC-00053	1018	.	A	C	.	PASS	.
ERCC-00053	1019	.	A	C	.	PASS	.
ERCC-00053	1020	.	A	C	.	PASS	.
ERCC-00053	1021	.	A	C	.	PASS	.
ERCC-00053	1022	.	A	C	.	PASS	.
ERCC-00053	1023	.	A	C	.	PASS	.
ERCC-00054	193	.	A	C	.	PASS	.
ERCC-00054	194	.	A	C	.	PASS	.
ERCC-00054	195	.	A	C	.	PASS	.
ERCC-00054	196	.	A	C	.	PASS	.
ERCC-00054	197	.	A	C	.	PASS	.
ERCC-00054	198	.	A	C	.	PASS	.
ERCC-00054	199	.	A	C	.	PASS	.
ERCC-00054	200	.	A	C	.	PASS	.
ERCC-00054	201	.	A	C	.	PASS	.
ERCC-00054	202	.	A	C	.	PASS	.
ERCC-00054	203	.	A	C	.	PASS	.
ERCC-00054	204	.	A	C	.	PASS	.
ERCC-00054	205	.	A	C	.	PASS	.
ERCC-00054	206	.	A	C	.	PASS	.
ERCC-00054	207	.	A	C	.	PASS	.
ERCC-00054	208	.	A	C	.	PASS	.
ERCC-00054	209	.	A	C	.	PASS	.
ERCC-00054	210	.	A	C	.	PASS	.
ERCC-00054	211	.	A	C	.	PASS	.
ERCC-00054	212	.	A	C	.	PASS	.
ERCC-00054	213	.	A	C	.	PASS	.
ERCC-00054	214	.	A	C	.	PASS	.
ERCC-00054	215	.	A	C	.	PASS	.
ERCC-00054	216	.	A	C	.	PASS	.
ERCC-00054	217	.	A	C	.	PASS	.
ERCC-00054	218	.	A	C	.	PASS	.
ERCC-00054	219	.	A	C	.	PASS	.
ERCC-00054	220	.	A	C	.	PASS	.
ERCC-00054	221	.	A	C	.	PASS	.
ERCC-00054	222	.	A	C	.	PASS	.
ERCC-00054	223	.	A	C	.	PASS	.
ERCC-00054	224	.	A	C	.	PASS	.
ERCC-00054	225	.	A	C	.	PASS	.
ERCC-00054	226	.	A	C	.	PASS	.
ERCC-00054	227	.	A	C	.	PASS	.
ERCC-00054	228	.	A	C	.	PASS	.
ERCC-00054	229	.	A	C	.	PASS	.
ERCC-00054	230	.	A	C	.	PASS	.
ERCC-00054	231	.	A	C	.	PASS	.
ERCC-00054	232	.	A	C	.	PASS	.
ERCC-00054	233	.	A	C	.	PASS	.
ERCC-00054	234	.	A	C	.	PASS	.
ERCC-00054	235	.	A	C	.	PASS	.
ERCC-00054	236	.	A	C	.	PASS	.
ERCC-00054	237	.	A	C	.	PASS	.
ERCC-00054	238	.	A	C	.	PASS	.
ERCC-00054	239	.	A	C	.	PASS	.
ERCC-00054	240	.	A	C	.	PASS	.
ERCC-00054	241	.	A	C	.	PASS	.
ERCC-00054	242	.	A	C	.	PASS	.
ERCC-00054	243	.	A	C	.	PASS	.
ERCC-00054	249	.	A	C	.	PASS	.
ERCC-00054	250	.	A	C	.	PASS	.
ERCC-00054	251	.	A	C	.	PASS	.
ERCC-00054	252	.	A	C	.	PASS	.
ERCC-00054	253	.	A	C	.	PASS	.
ERCC-00054	254	.	A	C	.	PASS	.
ERCC-00054	255	.	A	C	.	PASS	.
ERCC-00054	256	.	A	C	.	PASS	.
ERCC-00054	257	.	A	C	.	PASS	.
ERCC-00054	258	.	A	C	.	PASS	.
ERCC-00054	259	.	A	C	.	PASS	.
ERCC-00054	260	.	A	C	.	PASS	.
ERCC-00054	261	.	A	C	.	PASS	.
ERCC-00054	262	.	A	C	.	PASS	.
ERCC-00054	263	.	A	C	.	PASS	.
ERCC-00054	264	.	A	C	.	PASS	.
ERCC-00054	265	.	A	C	.	PASS	.
ERCC-00054	266	.	A	C	.	PASS	.
ERCC-00054	267	.	A	C	.	PASS	.
ERCC-00054	268	.	A	C	.	PASS	.
ERCC-00054	269	.	A	C	.	PASS	.
ERCC-00054	270	.	A	C	.	PASS	.
ERCC-00054	271	.	A	C	.	PASS	.
ERCC-00054	272	.	A	C	.	PASS	.
ERCC-00054	273	.	A	C	.	PASS	.
ERCC-00054	274	.	A	C	.	PASS	.
ERCC-00057	945	.	A	C	.	PASS	.
ERCC-00057	946	.	A	C	.	PASS	.
ERCC-00057	947	.	A	C	.	PASS	.
ERCC-00057	948	.	A	C	.	PASS	.
ERCC-00057	949	.	A	C	.	PASS	.
ERCC-00057	950	.	A	C	.	PASS	.
ERCC-00057	951	.	A	C	.	PASS	.
ERCC-00057	952	.	A	C	.	PASS	.
ERCC-00057	953	.	A	C	.	PASS	.
ERCC-00057	954	.	A	C	.	PASS	.
ERCC-00057	955	.	A	C	.	PASS	.
ERCC-00057	956	.	A	C	.	PASS	.
ERCC-00057	957	.	A	C	.	PASS	.
ERCC-00057	958	.	A	C	.	PASS	.
ERCC-00057	959	.	A	C	.	PASS	.
ERCC-00057	960	.	A	C	.	PASS	.
ERCC-00057	961	.	A	C	.	PASS	.
ERCC-00057	962	.	A	C	.	PASS	.
ERCC-00057	963	.	A	C	.	PASS	.
ERCC-00057	964	.	A	C	.	PASS	.
ERCC-00057	965	.	A	C	.	PASS	.
ERCC-00057	966	.	A	C	.	PASS	.
ERCC-00057	967	.	A	C	.	PASS	.
ERCC-00057	968	.	A	C	.	PASS	.
ERCC-00057	969	.	A	C	.	PASS	.
ERCC-00057	970	.	A	C	.	PASS	.
ERCC-00057	971	.	A	C	.	PASS	.
ERCC-00057	972	.	A	C	.	PASS	.
ERCC-00057	973	.	A	C	.	PASS	.
ERCC-00057	974	.	A	C	.	PASS	.
ERCC-00057	975	.	A	C	.	PASS	.
ERCC-00057	976	.	A	C	.	PASS	.
ERCC-00057	977	.	A	C	.	PASS	.
ERCC-00057	978	.	A	C	.	PASS	.
ERCC-00057	979	.	A	C	.	PASS	.
ERCC-00057	980	.	A	C	.	PASS	.
ERCC-00057	981	.	A	C	.	PASS	.
ERCC-00057	982	.	A	C	.	PASS	.
ERCC-00057	983	.	A	C	.	PASS	.
ERCC-00057	984	.	A	C	.	PASS	.
ERCC-00057	985	.	A	C	.	PASS	.
ERCC-00057	986	.	A	C	.	PASS	.
ERCC-00057	987	.	A	C	.	PASS	.
ERCC-00057	988	.	A	C	.	PASS	.
ERCC-00057	989	.	A	C	.	PASS	.
ERCC-00057	990	.	A	C	.	PASS	.
ERCC-00057	991	.	A	C	.	PASS	.
ERCC-00057	992	.	A	C	.	PASS	.
ERCC-00057	993	.	A	C	.	PASS	.
ERCC-00057	994	.	A	C	.	PASS	.
ERCC-00057	995	.	A	C	.	PASS	.
ERCC-00057	1001	.	A	C	.	PASS	.
ERCC-00057	1002	.	A	C	.	PASS	.
ERCC-00057	1003	.	A	C	.	PASS	.
ERCC-00057	1004	.	A	C	.	PASS	.
ERCC-00057	1005	.	A	C	.	PASS	.
ERCC-00057	1006	.	A	C	.	PASS	.
ERCC-00057	1007	.	A	C	.	PASS	.
ERCC-00057	1008	.	A	C	.	PASS	.
ERCC-00057	1009	.	A	C	.	PASS	.
ERCC-00057	1010	.	A	C	.	PASS	.
ERCC-00057	1011	.	A	C	.	PASS	.
ERCC-00057	1012	.	A	C	.	PASS	.
ERCC-00057	1013	.	A	C	.	PASS	.
ERCC-00057	1014	.	A	C	.	PASS	.
ERCC-00057	1015	.	A	C	.	PASS	.
ERCC-00057	1016	.	A	C	.	PASS	.
ERCC-00057	1017	.	A	C	.	PASS	.
ERCC-00057	1018	.	A	C	.	PASS	.
ERCC-00057	1019	.	A	C	.	PASS	.
ERCC-00057	1020	.	A	C	.	PASS	.
ERCC-00057	1021	.	A	C	.	PASS	.
ERCC-00058	1053	.	A	C	.	PASS	.
ERCC-00058	1054	.	A	C	.	PASS	.
ERCC-00058	1055	.	A	C	.	PASS	.
ERCC-00058	1056	.	A	C	.	PASS	.
ERCC-00058	1057	.	A	C	.	PASS	.
ERCC-00058	1058	.	A	C	.	PASS	.
ERCC-00058	1059	.	A	C	.	PASS	.
ERCC-00058	1060	.	A	C	.	PASS	.
ERCC-00058	1061	.	A	C	.	PASS	.
ERCC-00058	1062	.	A	C	.	PASS	.
ERCC-00058	1063	.	A	C	.	PASS	.
ERCC-00058	1064	.	A	C	.	PASS	.
ERCC-00058	1065	.	A	C	.	PASS	.
ERCC-00058	1066	.	A	C	.	PASS	.
ERCC-00058	1067	.	A	C	.	PASS	.
ERCC-00058	1068	.	A	C	.	PASS	.
ERCC-00058	1069	.	A	C	.	PASS	.
ERCC-00058	1070	.	A	C	.	PASS	.
ERCC-00058	1071	.	A	C	.	PASS	.
ERCC-00058	1072	.	A	C	.	PASS	.
ERCC-00058	1073	.	A	C	.	PASS	.
ERCC-00058	1074	.	A	C	.	PASS	.
ERCC-00058	1075	.	A	C	.	PASS	.
ERCC-00058	1076	.	A	C	.	PASS	.
ERCC-00058	1077	.	A	C	.	PASS	.
ERCC-00058	1078	.	A	C	.	PASS	.
ERCC-00058	1079	.	A	C	.	PASS	.
ERCC-00058	1080	.	A	C	.	PASS	.
ERCC-00058	1081	.	A	C	.	PASS	.
ERCC-00058	1082	.	A	C	.	PASS	.
ERCC-00058	1083	.	A	C	.	PASS	.
ERCC-00058	1084	.	A	C	.	PASS	.
ERCC-00058	1085	.	A	C	.	PASS	.
ERCC-00058	1086	.	A	C	.	PASS	.
ERCC-00058	1087	.	A	C	.	PASS	.
ERCC-00058	1088	.	A	C	.	PASS	.
ERCC-00058	1089	.	A	C	.	PASS	.
ERCC-00058	1090	.	A	C	.	PASS	.
ERCC-00058	1091	.	A	C	.	PASS	.
ERCC-00058	1092	.	A	C	.	PASS	.
ERCC-00058	1093	.	A	C	.	PASS	.
ERCC-00058	1094	.	A	C	.	PASS	.
ERCC-00058	1095	.	A	C	.	PASS	.
ERCC-00058	1096	.	A	C	.	PASS	.
ERCC-00058	1097	.	A	C	.	PASS	.
ERCC-00058	1098	.	A	C	.	PASS	.
ERCC-00058	1099	.	A	C	.	PASS	.
ERCC-00058	1100	.	A	C	.	PASS	.
ERCC-00058	1101	.	A	C	.	PASS	.
ERCC-00058	1102	.	A	C	.	PASS	.
ERCC-00058	1103	.	A	C	.	PASS	.
ERCC-00058	1113	.	A	C	.	PASS	.
ERCC-00058	1114	.	A	C	.	PASS	.
ERCC-00058	1115	.	A	C	.	PASS	.
ERCC-00058	1116	.	A	C	.	PASS	.
ERCC-00058	1117	.	A	C	.	PASS	.
ERCC-00058	1118	.	A	C	.	PASS	.
ERCC-00058	1119	.	A	C	.	PASS	.
ERCC-00058	1120	.	A	C	.	PASS	.
ERCC-00058	1121	.	A	C	.	PASS	.
ERCC-00058	1122	.	A	C	.	PASS	.
ERCC-00058	1123	.	A	C	.	PASS	.
ERCC-00058	1124	.	A	C	.	PASS	.
ERCC-00058	1125	.	A	C	.	PASS	.
ERCC-00058	1126	.	A	C	.	PASS	.
ERCC-00058	1127	.	A	C	.	PASS	.
ERCC-00058	1128	.	A	C	.	PASS	.
ERCC-00058	1129	.	A	C	.	PASS	.
ERCC-00058	1130	.	A	C	.	PASS	.
ERCC-00058	1131	.	A	C	.	PASS	.
ERCC-00058	1132	.	A	C	.	PASS	.
ERCC-00058	1133	.	A	C	.	PASS	.
ERCC-00058	1134	.	A	C	.	PASS	.
ERCC-00058	1135	.	A	C	.	PASS	.
ERCC-00058	1136	.	A	C	.	PASS	.
ERCC-00059	449	.	A	C	.	PASS	.
ERCC-00059	450	.	A	C	.	PASS	.
ERCC-00059	451	.	A	C	.	PASS	.
ERCC-00059	452	.	A	C	.	PASS	.
ERCC-00059	453	.	A	C	.	PASS	.
ERCC-00059	454	.	A	C	.	PASS	.
ERCC-00059	455	.	A	C	.	PASS	.
ERCC-00059	456	.	A	C	.	PASS	.
ERCC-00059	457	.	A	C	.	PASS	.
ERCC-00059	458	.	A	C	.	PASS	.
ERCC-00059	459	.	A	C	.	PASS	.
ERCC-00059	460	.	A	C	.	PASS	.
ERCC-00059	461	.	A	C	.	PASS	.
ERCC-00059	462	.	A	C	.	PASS	.
ERCC-00059	463	.	A	C	.	PASS	.
ERCC-00059	464	.	A	C	.	PASS	.
ERCC-00059	465	.	A	C	.	PASS	.
ERCC-00059	466	.	A	C	.	PASS	.
ERCC-00059	467	.	A	C	.	PASS	.
ERCC-00059	468	.	A	C	.	PASS	.
ERCC-00059	469	.	A	C	.	PASS	.
ERCC-00059	470	.	A	C	.	PASS	.
ERCC-00059	471	.	A	C	.	PASS	.
ERCC-00059	472	.	A	C	.	PASS	.
ERCC-00059	473	.	A	C	.	PASS	.
ERCC-00059	474	.	A	C	.	PASS	.
ERCC-00059	475	.	A	C	.	PASS	.
ERCC-00059	476	.	A	C	.	PASS	.
ERCC-00059	477	.	A	C	.	PASS	.
ERCC-00059	478	.	A	C	.	PASS	.
ERCC-00059	479	.	A	C	.	PASS	.
ERCC-00059	480	.	A	C	.	PASS	.
ERCC-00059	481	.	A	C	.	PASS	.
ERCC-00059	482	.	A	C	.	PASS	.
ERCC-00059	483	.	A	C	.	PASS	.
ERCC-00059	484	.	A	C	.	PASS	.
ERCC-00059	485	.	A	C	.	PASS	.
ERCC-00059	486	.	A	C	.	PASS	.
ERCC-00059	487	.	A	C	.	PASS	.
ERCC-00059	488	.	A	C	.	PASS	.
ERCC-00059	489	.	A	C	.	PASS	.
ERCC-00059	490	.	A	C	.	PASS	.
ERCC-00059	491	.	A	C	.	PASS	.
ERCC-00059	492	.	A	C	.	PASS	.
ERCC-00059	493	.	A	C	.	PASS	.
ERCC-00059	494	.	A	C	.	PASS	.
ERCC-00059	495	.	A	C	.	PASS	.
ERCC-00059	496	.	A	C	.	PASS	.
ERCC-00059	497	.	A	C	.	PASS	.
ERCC-00059	498	.	A	C	.	PASS	.
ERCC-00059	499	.	A	C	.	PASS	.
ERCC-00059	502	.	A	C	.	PASS	.
ERCC-00059	503	.	A	C	.	PASS	.
ERCC-00059	504	.	A	C	.	PASS	.
ERCC-00059	505	.	A	C	.	PASS	.
ERCC-00059	506	.	A	C	.	PASS	.
ERCC-00059	507	.	A	C	.	PASS	.
ERCC-00059	508	.	A	C	.	PASS	.
ERCC-00059	509	.	A	C	.	PASS	.
ERCC-00059	510	.	A	C	.	PASS	.
ERCC-00059	511	.	A	C	.	PASS	.
ERCC-00059	512	.	A	C	.	PASS	.
ERCC-00059	513	.	A	C	.	PASS	.
ERCC-00059	514	.	A	C	.	PASS	.
ERCC-00059	515	.	A	C	.	PASS	.
ERCC-00059	516	.	A	C	.	PASS	.
ERCC-00059	517	.	A	C	.	PASS	.
ERCC-00059	518	.	A	C	.	PASS	.
ERCC-00059	519	.	A	C	.	PASS	.
ERCC-00059	520	.	A	C	.	PASS	.
ERCC-00059	521	.	A	C	.	PASS	.
ERCC-00059	522	.	A	C	.	PASS	.
ERCC-00059	523	.	A	C	.	PASS	.
ERCC-00059	524	.	A	C	.	PASS	.
ERCC-00059	525	.	A	C	.	PASS	.
ERCC-00060	437	.	A	C	.	PASS	.
ERCC-00060	438	.	A	C	.	PASS	.
ERCC-00060	439	.	A	C	.	PASS	.
ERCC-00060	440	.	A	C	.	PASS	.
ERCC-00060	441	.	A	C	.	PASS	.
ERCC-00060	442	.	A	C	.	PASS	.
ERCC-00060	443	.	A	C	.	PASS	.
ERCC-00060	444	.	A	C	.	PASS	.
ERCC-00060	445	.	A	C	.	PASS	.
ERCC-00060	446	.	A	C	.	PASS	.
ERCC-00060	447	.	A	C	.	PASS	.
ERCC-00060	448	.	A	C	.	PASS	.
ERCC-00060	449	.	A	C	.	PASS	.
ERCC-00060	450	.	A	C	.	PASS	.
ERCC-00060	451	.	A	C	.	PASS	.
ERCC-00060	452	.	A	C	.	PASS	.
ERCC-00060	453	.	A	C	.	PASS	.
ERCC-00060	454	.	A	C	.	PASS	.
ERCC-00060	455	.	A	C	.	PASS	.
ERCC-00060	456	.	A	C	.	PASS	.
ERCC-00060	457	.	A	C	.	PASS	.
ERCC-00060	458	.	A	C	.	PASS	.
ERCC-00060	459	.	A	C	.	PASS	.
ERCC-00060	460	.	A	C	.	PASS	.
ERCC-00060	461	.	A	C	.	PASS	.
ERCC-00060	462	.	A	C	.	PASS	.
ERCC-00060	463	.	A	C	.	PASS	.
ERCC-00060	464	.	A	C	.	PASS	.
ERCC-00060	465	.	A	C	.	PASS	.
ERCC-00060	466	.	A	C	.	PASS	.
ERCC-00060	467	.	A	C	.	PASS	.
ERCC-00060	468	.	A	C	.	PASS	.
ERCC-00060	469	.	A	C	.	PASS	.
ERCC-00060	470	.	A	C	.	PASS	.
ERCC-00060	471	.	A	C	.	PASS	.
ERCC-00060	472	.	A	C	.	PASS	.
ERCC-00060	473	.	A	C	.	PASS	.
ERCC-00060	474	.	A	C	.	PASS	.
ERCC-00060	475	.	A	C	.	PASS	.
ERCC-00060	476	.	A	C	.	PASS	.
ERCC-00060	477	.	A	C	.	PASS	.
ERCC-00060	478	.	A	C	.	PASS	.
ERCC-00060	479	.	A	C	.	PASS	.
ERCC-00060	480	.	A	C	.	PASS	.
ERCC-00060	481	.	A	C	.	PASS	.
ERCC-00060	482	.	A	C	.	PASS	.
ERCC-00060	483	.	A	C	.	PASS	.
ERCC-00060	484	.	A	C	.	PASS	.
ERCC-00060	485	.	A	C	.	PASS	.
ERCC-00060	486	.	A	C	.	PASS	.
ERCC-00060	487	.	A	C	.	PASS	.
ERCC-00060	499	.	A	C	.	PASS	.
ERCC-00060	500	.	A	C	.	PASS	.
ERCC-00060	501	.	A	C	.	PASS	.
ERCC-00060	502	.	A	C	.	PASS	.
ERCC-00060	503	.	A	C	.	PASS	.
ERCC-00060	504	.	A	C	.	PASS	.
ERCC-00060	505	.	A	C	.	PASS	.
ERCC-00060	506	.	A	C	.	PASS	.
ERCC-00060	507	.	A	C	.	PASS	.
ERCC-00060	508	.	A	C	.	PASS	.
ERCC-00060	509	.	A	C	.	PASS	.
ERCC-00060	510	.	A	C	.	PASS	.
ERCC-00060	511	.	A	C	.	PASS	.
ERCC-00060	512	.	A	C	.	PASS	.
ERCC-00060	513	.	A	C	.	PASS	.
ERCC-00060	514	.	A	C	.	PASS	.
ERCC-00060	515	.	A	C	.	PASS	.
ERCC-00060	516	.	A	C	.	PASS	.
ERCC-00060	517	.	A	C	.	PASS	.
ERCC-00060	518	.	A	C	.	PASS	.
ERCC-00060	519	.	A	C	.	PASS	.
ERCC-00060	520	.	A	C	.	PASS	.
ERCC-00060	521	.	A	C	.	PASS	.
ERCC-00060	522	.	A	C	.	PASS	.
ERCC-00060	523	.	A	C	.	PASS	.
ERCC-00061	1055	.	A	C	.	PASS	.
ERCC-00061	1056	.	A	C	.	PASS	.
ERCC-00061	1057	.	A	C	.	PASS	.
ERCC-00061	1058	.	A	C	.	PASS	.
ERCC-00061	1059	.	A	C	.	PASS	.
ERCC-00061	1060	.	A	C	.	PASS	.
ERCC-00061	1061	.	A	C	.	PASS	.
ERCC-00061	1062	.	A	C	.	PASS	.
ERCC-00061	1063	.	A	C	.	PASS	.
ERCC-00061	1064	.	A	C	.	PASS	.
ERCC-00061	1065	.	A	C	.	PASS	.
ERCC-00061	1066	.	A	C	.	PASS	.
ERCC-00061	1067	.	A	C	.	PASS	.
ERCC-00061	1068	.	A	C	.	PASS	.
ERCC-00061	1069	.	A	C	.	PASS	.
ERCC-00061	1070	.	A	C	.	PASS	.
ERCC-00061	1071	.	A	C	.	PASS	.
ERCC-00061	1072	.	A	C	.	PASS	.
ERCC-00061	1073	.	A	C	.	PASS	.
ERCC-00061	1074	.	A	C	.	PASS	.
ERCC-00061	1075	.	A	C	.	PASS	.
ERCC-00061	1076	.	A	C	.	PASS	.
ERCC-00061	1077	.	A	C	.	PASS	.
ERCC-00061	1078	.	A	C	.	PASS	.
ERCC-00061	1079	.	A	C	.	PASS	.
ERCC-00061	1080	.	A	C	.	PASS	.
ERCC-00061	1081	.	A	C	.	PASS	.
ERCC-00061	1082	.	A	C	.	PASS	.
ERCC-00061	1083	.	A	C	.	PASS	.
ERCC-00061	1084	.	A	C	.	PASS	.
ERCC-00061	1085	.	A	C	.	PASS	.
ERCC-00061	1086	.	A	C	.	PASS	.
ERCC-00061	1087	.	A	C	.	PASS	.
ERCC-00061	1088	.	A	C	.	PASS	.
ERCC-00061	1089	.	A	C	.	PASS	.
ERCC-00061	1090	.	A	C	.	PASS	.
ERCC-00061	1091	.	A	C	.	PASS	.
ERCC-00061	1092	.	A	C	.	PASS	.
ERCC-00061	1093	.	A	C	.	PASS	.
ERCC-00061	1094	.	A	C	.	PASS	.
ERCC-00061	1095	.	A	C	.	PASS	.
ERCC-00061	1096	.	A	C	.	PASS	.
ERCC-00061	1097	.	A	C	.	PASS	.
ERCC-00061	1098	.	A	C	.	PASS	.
ERCC-00061	1099	.	A	C	.	PASS	.
ERCC-00061	1100	.	A	C	.	PASS	.
ERCC-00061	1101	.	A	C	.	PASS	.
ERCC-00061	1102	.	A	C	.	PASS	.
ERCC-00061	1103	.	A	C	.	PASS	.
ERCC-00061	1104	.	A	C	.	PASS	.
ERCC-00061	1105	.	A	C	.	PASS	.
ERCC-00061	1113	.	A	C	.	PASS	.
ERCC-00061	1114	.	A	C	.	PASS	.
ERCC-00061	1115	.	A	C	.	PASS	.
ERCC-00061	1116	.	A	C	.	PASS	.
ERCC-00061	1117	.	A	C	.	PASS	.
ERCC-00061	1118	.	A	C	.	PASS	.
ERCC-00061	1119	.	A	C	.	PASS	.
ERCC-00061	1120	.	A	C	.	PASS	.
ERCC-00061	1121	.	A	C	.	PASS	.
ERCC-00061	1122	.	A	C	.	PASS	.
ERCC-00061	1123	.	A	C	.	PASS	.
ERCC-00061	1124	.	A	C	.	PASS	.
ERCC-00061	1125	.	A	C	.	PASS	.
ERCC-00061	1126	.	A	C	.	PASS	.
ERCC-00061	1127	.	A	C	.	PASS	.
ERCC-00061	1128	.	A	C	.	PASS	.
ERCC-00061	1129	.	A	C	.	PASS	.
ERCC-00061	1130	.	A	C	.	PASS	.
ERCC-00061	1131	.	A	C	.	PASS	.
ERCC-00061	1132	.	A	C	.	PASS	.
ERCC-00061	1133	.	A	C	.	PASS	.
ERCC-00061	1134	.	A	C	.	PASS	.
ERCC-00061	1135	.	A	C	.	PASS	.
ERCC-00061	1136	.	A	C	.	PASS	.
ERCC-00062	56	.	A	C	.	PASS	.
ERCC-00062	935	.	A	C	.	PASS	.
ERCC-00062	936	.	A	C	.	PASS	.
ERCC-00062	937	.	A	C	.	PASS	.
ERCC-00062	938	.	A	C	.	PASS	.
ERCC-00062	939	.	A	C	.	PASS	.
ERCC-00062	940	.	A	C	.	PASS	.
ERCC-00062	941	.	A	C	.	PASS	.
ERCC-00062	942	.	A	C	.	PASS	.
ERCC-00062	943	.	A	C	.	PASS	.
ERCC-00062	944	.	A	C	.	PASS	.
ERCC-00062	945	.	A	C	.	PASS	.
ERCC-00062	946	.	A	C	.	PASS	.
ERCC-00062	947	.	A	C	.	PASS	.
ERCC-00062	948	.	A	C	.	PASS	.
ERCC-00062	949	.	A	C	.	PASS	.
ERCC-00062	950	.	A	C	.	PASS	.
ERCC-00062	951	.	A	C	.	PASS	.
ERCC-00062	952	.	A	C	.	PASS	.
ERCC-00062	953	.	A	C	.	PASS	.
ERCC-00062	954	.	A	C	.	PASS	.
ERCC-00062	955	.	A	C	.	PASS	.
ERCC-00062	956	.	A	C	.	PASS	.
ERCC-00062	957	.	A	C	.	PASS	.
ERCC-00062	958	.	A	C	.	PASS	.
ERCC-00062	959	.	A	C	.	PASS	.
ERCC-00062	960	.	A	C	.	PASS	.
ERCC-00062	961	.	A	C	.	PASS	.
ERCC-00062	962	.	A	C	.	PASS	.
ERCC-00062	963	.	A	C	.	PASS	.
ERCC-00062	964	.	A	C	.	PASS	.
ERCC-00062	965	.	A	C	.	PASS	.
ERCC-00062	966	.	A	C	.	PASS	.
ERCC-00062	967	.	A	C	.	PASS	.
ERCC-00062	968	.	A	C	.	PASS	.
ERCC-00062	969	.	A	C	.	PASS	.
ERCC-00062	970	.	A	C	.	PASS	.
ERCC-00062	971	.	A	C	.	PASS	.
ERCC-00062	972	.	A	C	.	PASS	.
ERCC-00062	973	.	A	C	.	PASS	.
ERCC-00062	974	.	A	C	.	PASS	.
ERCC-00062	975	.	A	C	.	PASS	.
ERCC-00062	976	.	A	C	.	PASS	.
ERCC-00062	977	.	A	C	.	PASS	.
ERCC-00062	978	.	A	C	.	PASS	.
ERCC-00062	979	.	A	C	.	PASS	.
ERCC-00062	980	.	A	C	.	PASS	.
ERCC-00062	981	.	A	C	.	PASS	.
ERCC-00062	982	.	A	C	.	PASS	.
ERCC-00062	983	.	A	C	.	PASS	.
ERCC-00062	984	.	A	C	.	PASS	.
ERCC-00062	985	.	A	C	.	PASS	.
ERCC-00062	1000	.	A	C	.	PASS	.
ERCC-00062	1001	.	A	C	.	PASS	.
ERCC-00062	1002	.	A	C	.	PASS	.
ERCC-00062	1003	.	A	C	.	PASS	.
ERCC-00062	1004	.	A	C	.	PASS	.
ERCC-00062	1005	.	A	C	.	PASS	.
ERCC-00062	1006	.	A	C	.	PASS	.
ERCC-00062	1007	.	A	C	.	PASS	.
ERCC-00062	1008	.	A	C	.	PASS	.
ERCC-00062	1009	.	A	C	.	PASS	.
ERCC-00062	1010	.	A	C	.	PASS	.
ERCC-00062	1011	.	A	C	.	PASS	.
ERCC-00062	1012	.	A	C	.	PASS	.
ERCC-00062	1013	.	A	C	.	PASS	.
ERCC-00062	1014	.	A	C	.	PASS	.
ERCC-00062	1015	.	A	C	.	PASS	.
ERCC-00062	1016	.	A	C	.	PASS	.
ERCC-00062	1017	.	A	C	.	PASS	.
ERCC-00062	1018	.	A	C	.	PASS	.
ERCC-00062	1019	.	A	C	.	PASS	.
ERCC-00062	1020	.	A	C	.	PASS	.
ERCC-00062	1021	.	A	C	.	PASS	.
ERCC-00062	1022	.	A	C	.	PASS	.
ERCC-00062	1023	.	A	C	.	PASS	.
ERCC-00067	567	.	A	C	.	PASS	.
ERCC-00067	568	.	A	C	.	PASS	.
ERCC-00067	569	.	A	C	.	PASS	.
ERCC-00067	570	.	A	C	.	PASS	.
ERCC-00067	571	.	A	C	.	PASS	.
ERCC-00067	572	.	A	C	.	PASS	.
ERCC-00067	573	.	A	C	.	PASS	.
ERCC-00067	574	.	A	C	.	PASS	.
ERCC-00067	575	.	A	C	.	PASS	.
ERCC-00067	576	.	A	C	.	PASS	.
ERCC-00067	577	.	A	C	.	PASS	.
ERCC-00067	578	.	A	C	.	PASS	.
ERCC-00067	579	.	A	C	.	PASS	.
ERCC-00067	580	.	A	C	.	PASS	.
ERCC-00067	581	.	A	C	.	PASS	.
ERCC-00067	582	.	A	C	.	PASS	.
ERCC-00067	583	.	A	C	.	PASS	.
ERCC-00067	584	.	A	C	.	PASS	.
ERCC-00067	585	.	A	C	.	PASS	.
ERCC-00067	586	.	A	C	.	PASS	.
ERCC-00067	587	.	A	C	.	PASS	.
ERCC-00067	588	.	A	C	.	PASS	.
ERCC-00067	589	.	A	C	.	PASS	.
ERCC-00067	590	.	A	C	.	PASS	.
ERCC-00067	591	.	A	C	.	PASS	.
ERCC-00067	592	.	A	C	.	PASS	.
ERCC-00067	593	.	A	C	.	PASS	.
ERCC-00067	594	.	A	C	.	PASS	.
ERCC-00067	595	.	A	C	.	PASS	.
ERCC-00067	596	.	A	C	.	PASS	.
ERCC-00067	597	.	A	C	.	PASS	.
ERCC-00067	598	.	A	C	.	PASS	.
ERCC-00067	599	.	A	C	.	PASS	.
ERCC-00067	600	.	A	C	.	PASS	.
ERCC-00067	601	.	A	C	.	PASS	.
ERCC-00067	602	.	A	C	.	PASS	.
ERCC-00067	603	.	A	C	.	PASS	.
ERCC-00067	604	.	A	C	.	PASS	.
ERCC-00067	605	.	A	C	.	PASS	.
ERCC-00067	606	.	A	C	.	PASS	.
ERCC-00067	607	.	A	C	.	PASS	.
ERCC-00067	608	.	A	C	.	PASS	.
ERCC-00067	609	.	A	C	.	PASS	.
ERCC-00067	610	.	A	C	.	PASS	.
ERCC-00067	611	.	A	C	.	PASS	.
ERCC-00067	612	.	A	C	.	PASS	.
ERCC-00067	613	.	A	C	.	PASS	.
ERCC-00067	614	.	A	C	.	PASS	.
ERCC-00067	615	.	A	C	.	PASS	.
ERCC-00067	616	.	A	C	.	PASS	.
ERCC-00067	617	.	A	C	.	PASS	.
ERCC-00067	621	.	A	C	.	PASS	.
ERCC-00067	622	.	A	C	.	PASS	.
ERCC-00067	623	.	A	C	.	PASS	.
ERCC-00067	624	.	A	C	.	PASS	.
ERCC-00067	625	.	A	C	.	PASS	.
ERCC-00067	626	.	A	C	.	PASS	.
ERCC-00067	627	.	A	C	.	PASS	.
ERCC-00067	628	.	A	C	.	PASS	.
ERCC-00067	629	.	A	C	.	PASS	.
ERCC-00067	630	.	A	C	.	PASS	.
ERCC-00067	631	.	A	C	.	PASS	.
ERCC-00067	632	.	A	C	.	PASS	.
ERCC-00067	633	.	A	C	.	PASS	.
ERCC-00067	634	.	A	C	.	PASS	.
ERCC-00067	635	.	A	C	.	PASS	.
ERCC-00067	636	.	A	C	.	PASS	.
ERCC-00067	637	.	A	C	.	PASS	.
ERCC-00067	638	.	A	C	.	PASS	.
ERCC-00067	639	.	A	C	.	PASS	.
ERCC-00067	640	.	A	C	.	PASS	.
ERCC-00067	641	.	A	C	.	PASS	.
ERCC-00067	642	.	A	C	.	PASS	.
ERCC-00067	643	.	A	C	.	PASS	.
ERCC-00067	644	.	A	C	.	PASS	.
ERCC-00069	1056	.	A	C	.	PASS	.
ERCC-00069	1057	.	A	C	.	PASS	.
ERCC-00069	1058	.	A	C	.	PASS	.
ERCC-00069	1059	.	A	C	.	PASS	.
ERCC-00069	1060	.	A	C	.	PASS	.
ERCC-00069	1061	.	A	C	.	PASS	.
ERCC-00069	1062	.	A	C	.	PASS	.
ERCC-00069	1063	.	A	C	.	PASS	.
ERCC-00069	1064	.	A	C	.	PASS	.
ERCC-00069	1065	.	A	C	.	PASS	.
ERCC-00069	1066	.	A	C	.	PASS	.
ERCC-00069	1067	.	A	C	.	PASS	.
ERCC-00069	1068	.	A	C	.	PASS	.
ERCC-00069	1069	.	A	C	.	PASS	.
ERCC-00069	1070	.	A	C	.	PASS	.
ERCC-00069	1071	.	A	C	.	PASS	.
ERCC-00069	1072	.	A	C	.	PASS	.
ERCC-00069	1073	.	A	C	.	PASS	.
ERCC-00069	1074	.	A	C	.	PASS	.
ERCC-00069	1075	.	A	C	.	PASS	.
ERCC-00069	1076	.	A	C	.	PASS	.
ERCC-00069	1077	.	A	C	.	PASS	.
ERCC-00069	1078	.	A	C	.	PASS	.
ERCC-00069	1079	.	A	C	.	PASS	.
ERCC-00069	1080	.	A	C	.	PASS	.
ERCC-00069	1081	.	A	C	.	PASS	.
ERCC-00069	1082	.	A	C	.	PASS	.
ERCC-00069	1083	.	A	C	.	PASS	.
ERCC-00069	1084	.	A	C	.	PASS	.
ERCC-00069	1085	.	A	C	.	PASS	.
ERCC-00069	1086	.	A	C	.	PASS	.
ERCC-00069	1087	.	A	C	.	PASS	.
ERCC-00069	1088	.	A	C	.	PASS	.
ERCC-00069	1089	.	A	C	.	PASS	.
ERCC-00069	1090	.	A	C	.	PASS	.
ERCC-00069	1091	.	A	C	.	PASS	.
ERCC-00069	1092	.	A	C	.	PASS	.
ERCC-00069	1093	.	A	C	.	PASS	.
ERCC-00069	1094	.	A	C	.	PASS	.
ERCC-00069	1095	.	A	C	.	PASS	.
ERCC-00069	1096	.	A	C	.	PASS	.
ERCC-00069	1097	.	A	C	.	PASS	.
ERCC-00069	1098	.	A	C	.	PASS	.
ERCC-00069	1099	.	A	C	.	PASS	.
ERCC-00069	1100	.	A	C	.	PASS	.
ERCC-00069	1101	.	A	C	.	PASS	.
ERCC-00069	1102	.	A	C	.	PASS	.
ERCC-00069	1103	.	A	C	.	PASS	.
ERCC-00069	1104	.	A	C	.	PASS	.
ERCC-00069	1105	.	A	C	.	PASS	.
ERCC-00069	1106	.	A	C	.	PASS	.
ERCC-00069	1114	.	A	C	.	PASS	.
ERCC-00069	1115	.	A	C	.	PASS	.
ERCC-00069	1116	.	A	C	.	PASS	.
ERCC-00069	1117	.	A	C	.	PASS	.
ERCC-00069	1118	.	A	C	.	PASS	.
ERCC-00069	1119	.	A	C	.	PASS	.
ERCC-00069	1120	.	A	C	.	PASS	.
ERCC-00069	1121	.	A	C	.	PASS	.
ERCC-00069	1122	.	A	C	.	PASS	.
ERCC-00069	1123	.	A	C	.	PASS	.
ERCC-00069	1124	.	A	C	.	PASS	.
ERCC-00069	1125	.	A	C	.	PASS	.
ERCC-00069	1126	.	A	C	.	PASS	.
ERCC-00069	1127	.	A	C	.	PASS	.
ERCC-00069	1128	.	A	C	.	PASS	.
ERCC-00069	1129	.	A	C	.	PASS	.
ERCC-00069	1130	.	A	C	.	PASS	.
ERCC-00069	1131	.	A	C	.	PASS	.
ERCC-00069	1132	.	A	C	.	PASS	.
ERCC-00069	1133	.	A	C	.	PASS	.
ERCC-00069	1134	.	A	C	.	PASS	.
ERCC-00069	1135	.	A	C	.	PASS	.
ERCC-00069	1136	.	A	C	.	PASS	.
ERCC-00069	1137	.	A	C	.	PASS	.
ERCC-00071	1	.	A	C	.	PASS	.
ERCC-00071	2	.	A	C	.	PASS	.
ERCC-00071	3	.	A	C	.	PASS	.
ERCC-00071	566	.	A	C	.	PASS	.
ERCC-00071	567	.	A	C	.	PASS	.
ERCC-00071	568	.	A	C	.	PASS	.
ERCC-00071	569	.	A	C	.	PASS	.
ERCC-00071	570	.	A	C	.	PASS	.
ERCC-00071	571	.	A	C	.	PASS	.
ERCC-00071	572	.	A	C	.	PASS	.
ERCC-00071	573	.	A	C	.	PASS	.
ERCC-00071	574	.	A	C	.	PASS	.
ERCC-00071	575	.	A	C	.	PASS	.
ERCC-00071	576	.	A	C	.	PASS	.
ERCC-00071	577	.	A	C	.	PASS	.
ERCC-00071	578	.	A	C	.	PASS	.
ERCC-00071	579	.	A	C	.	PASS	.
ERCC-00071	580	.	A	C	.	PASS	.
ERCC-00071	581	.	A	C	.	PASS	.
ERCC-00071	582	.	A	C	.	PASS	.
ERCC-00071	583	.	A	C	.	PASS	.
ERCC-00071	584	.	A	C	.	PASS	.
ERCC-00071	585	.	A	C	.	PASS	.
ERCC-00071	586	.	A	C	.	PASS	.
ERCC-00071	587	.	A	C	.	PASS	.
ERCC-00071	588	.	A	C	.	PASS	.
ERCC-00071	589	.	A	C	.	PASS	.
ERCC-00071	590	.	A	C	.	PASS	.
ERCC-00071	591	.	A	C	.	PASS	.
ERCC-00071	592	.	A	C	.	PASS	.
ERCC-00071	593	.	A	C	.	PASS	.
ERCC-00071	594	.	A	C	.	PASS	.
ERCC-00071	595	.	A	C	.	PASS	.
ERCC-00071	596	.	A	C	.	PASS	.
ERCC-00071	597	.	A	C	.	PASS	.
ERCC-00071	598	.	A	C	.	PASS	.
ERCC-00071	599	.	A	C	.	PASS	.
ERCC-00071	600	.	A	C	.	PASS	.
ERCC-00071	601	.	A	C	.	PASS	.
ERCC-00071	602	.	A	C	.	PASS	.
ERCC-00071	603	.	A	C	.	PASS	.
ERCC-00071	604	.	A	C	.	PASS	.
ERCC-00071	605	.	A	C	.	PASS	.
ERCC-00071	606	.	A	C	.	PASS	.
ERCC-00071	607	.	A	C	.	PASS	.
ERCC-00071	608	.	A	C	.	PASS	.
ERCC-00071	609	.	A	C	.	PASS	.
ERCC-00071	610	.	A	C	.	PASS	.
ERCC-00071	611	.	A	C	.	PASS	.
ERCC-00071	612	.	A	C	.	PASS	.
ERCC-00071	613	.	A	C	.	PASS	.
ERCC-00071	614	.	A	C	.	PASS	.
ERCC-00071	615	.	A	C	.	PASS	.
ERCC-00071	616	.	A	C	.	PASS	.
ERCC-00071	619	.	A	C	.	PASS	.
ERCC-00071	620	.	A	C	.	PASS	.
ERCC-00071	621	.	A	C	.	PASS	.
ERCC-00071	622	.	A	C	.	PASS	.
ERCC-00071	623	.	A	C	.	PASS	.
ERCC-00071	624	.	A	C	.	PASS	.
ERCC-00071	625	.	A	C	.	PASS	.
ERCC-00071	626	.	A	C	.	PASS	.
ERCC-00071	627	.	A	C	.	PASS	.
ERCC-00071	628	.	A	C	.	PASS	.
ERCC-00071	629	.	A	C	.	PASS	.
ERCC-00071	630	.	A	C	.	PASS	.
ERCC-00071	631	.	A	C	.	PASS	.
ERCC-00071	632	.	A	C	.	PASS	.
ERCC-00071	633	.	A	C	.	PASS	.
ERCC-00071	634	.	A	C	.	PASS	.
ERCC-00071	635	.	A	C	.	PASS	.
ERCC-00071	636	.	A	C	.	PASS	.
ERCC-00071	637	.	A	C	.	PASS	.
ERCC-00071	638	.	A	C	.	PASS	.
ERCC-00071	639	.	A	C	.	PASS	.
ERCC-00071	640	.	A	C	.	PASS	.
ERCC-00071	641	.	A	C	.	PASS	.
ERCC-00071	642	.	A	C	.	PASS	.
ERCC-00073	528	.	A	C	.	PASS	.
ERCC-00073	529	.	A	C	.	PASS	.
ERCC-00073	530	.	A	C	.	PASS	.
ERCC-00073	531	.	A	C	.	PASS	.
ERCC-00073	532	.	A	C	.	PASS	.
ERCC-00073	533	.	A	C	.	PASS	.
ERCC-00073	534	.	A	C	.	PASS	.
ERCC-00073	535	.	A	C	.	PASS	.
ERCC-00073	536	.	A	C	.	PASS	.
ERCC-00073	537	.	A	C	.	PASS	.
ERCC-00073	538	.	A	C	.	PASS	.
ERCC-00073	539	.	A	C	.	PASS	.
ERCC-00073	540	.	A	C	.	PASS	.
ERCC-00073	541	.	A	C	.	PASS	.
ERCC-00073	542	.	A	C	.	PASS	.
ERCC-00073	543	.	A	C	.	PASS	.
ERCC-00073	544	.	A	C	.	PASS	.
ERCC-00073	545	.	A	C	.	PASS	.
ERCC-00073	546	.	A	C	.	PASS	.
ERCC-00073	547	.	A	C	.	PASS	.
ERCC-00073	548	.	A	C	.	PASS	.
ERCC-00073	549	.	A	C	.	PASS	.
ERCC-00073	550	.	A	C	.	PASS	.
ERCC-00073	551	.	A	C	.	PASS	.
ERCC-00073	552	.	A	C	.	PASS	.
ERCC-00073	553	.	A	C	.	PASS	.
ERCC-00073	554	.	A	C	.	PASS	.
ERCC-00073	555	.	A	C	.	PASS	.
ERCC-00073	556	.	A	C	.	PASS	.
ERCC-00073	557	.	A	C	.	PASS	.
ERCC-00073	558	.	A	C	.	PASS	.
ERCC-00073	559	.	A	C	.	PASS	.
ERCC-00073	560	.	A	C	.	PASS	.
ERCC-00073	561	.	A	C	.	PASS	.
ERCC-00073	562	.	A	C	.	PASS	.
ERCC-00073	563	.	A	C	.	PASS	.
ERCC-00073	564	.	A	C	.	PASS	.
ERCC-00073	565	.	A	C	.	PASS	.
ERCC-00073	566	.	A	C	.	PASS	.
ERCC-00073	567	.	A	C	.	PASS	.
ERCC-00073	568	.	A	C	.	PASS	.
ERCC-00073	569	.	A	C	.	PASS	.
ERCC-00073	570	.	A	C	.	PASS	.
ERCC-00073	571	.	A	C	.	PASS	.
ERCC-00073	572	.	A	C	.	PASS	.
ERCC-00073	573	.	A	C	.	PASS	.
ERCC-00073	574	.	A	C	.	PASS	.
ERCC-00073	575	.	A	C	.	PASS	.
ERCC-00073	576	.	A	C	.	PASS	.
ERCC-00073	577	.	A	C	.	PASS	.
ERCC-00073	578	.	A	C	.	PASS	.
ERCC-00073	580	.	A	C	.	PASS	.
ERCC-00073	581	.	A	C	.	PASS	.
ERCC-00073	582	.	A	C	.	PASS	.
ERCC-00073	583	.	A	C	.	PASS	.
ERCC-00073	584	.	A	C	.	PASS	.
ERCC-00073	585	.	A	C	.	PASS	.
ERCC-00073	586	.	A	C	.	PASS	.
ERCC-00073	587	.	A	C	.	PASS	.
ERCC-00073	588	.	A	C	.	PASS	.
ERCC-00073	589	.	A	C	.	PASS	.
ERCC-00073	590	.	A	C	.	PASS	.
ERCC-00073	591	.	A	C	.	PASS	.
ERCC-00073	592	.	A	C	.	PASS	.
ERCC-00073	593	.	A	C	.	PASS	.
ERCC-00073	594	.	A	C	.	PASS	.
ERCC-00073	595	.	A	C	.	PASS	.
ERCC-00073	596	.	A	C	.	PASS	.
ERCC-00073	597	.	A	C	.	PASS	.
ERCC-00073	598	.	A	C	.	PASS	.
ERCC-00073	599	.	A	C	.	PASS	.
ERCC-00073	600	.	A	C	.	PASS	.
ERCC-00073	601	.	A	C	.	PASS	.
ERCC-00073	602	.	A	C	.	PASS	.
ERCC-00073	603	.	A	C	.	PASS	.
ERCC-00074	1	.	A	C	.	PASS	.
ERCC-00074	2	.	A	C	.	PASS	.
ERCC-00074	3	.	A	C	.	PASS	.
ERCC-00074	4	.	A	C	.	PASS	.
ERCC-00074	5	.	A	C	.	PASS	.
ERCC-00074	6	.	A	C	.	PASS	.
ERCC-00074	7	.	A	C	.	PASS	.
ERCC-00074	8	.	A	C	.	PASS	.
ERCC-00074	9	.	A	C	.	PASS	.
ERCC-00074	10	.	A	C	.	PASS	.
ERCC-00074	11	.	A	C	.	PASS	.
ERCC-00074	12	.	A	C	.	PASS	.
ERCC-00074	13	.	A	C	.	PASS	.
ERCC-00074	14	.	A	C	.	PASS	.
ERCC-00074	15	.	A	C	.	PASS	.
ERCC-00074	445	.	A	C	.	PASS	.
ERCC-00074	446	.	A	C	.	PASS	.
ERCC-00074	447	.	A	C	.	PASS	.
ERCC-00074	448	.	A	C	.	PASS	.
ERCC-00074	449	.	A	C	.	PASS	.
ERCC-00074	450	.	A	C	.	PASS	.
ERCC-00074	451	.	A	C	.	PASS	.
ERCC-00074	452	.	A	C	.	PASS	.
ERCC-00074	453	.	A	C	.	PASS	.
ERCC-00074	454	.	A	C	.	PASS	.
ERCC-00074	455	.	A	C	.	PASS	.
ERCC-00074	456	.	A	C	.	PASS	.
ERCC-00074	457	.	A	C	.	PASS	.
ERCC-00074	458	.	A	C	.	PASS	.
ERCC-00074	459	.	A	C	.	PASS	.
ERCC-00074	460	.	A	C	.	PASS	.
ERCC-00074	461	.	A	C	.	PASS	.
ERCC-00074	462	.	A	C	.	PASS	.
ERCC-00074	463	.	A	C	.	PASS	.
ERCC-00074	464	.	A	C	.	PASS	.
ERCC-00074	465	.	A	C	.	PASS	.
ERCC-00074	466	.	A	C	.	PASS	.
ERCC-00074	467	.	A	C	.	PASS	.
ERCC-00074	468	.	A	C	.	PASS	.
ERCC-00074	469	.	A	C	.	PASS	.
ERCC-00074	470	.	A	C	.	PASS	.
ERCC-00074	471	.	A	C	.	PASS	.
ERCC-00074	472	.	A	C	.	PASS	.
ERCC-00074	473	.	A	C	.	PASS	.
ERCC-00074	474	.	A	C	.	PASS	.
ERCC-00074	475	.	A	C	.	PASS	.
ERCC-00074	476	.	A	C	.	PASS	.
ERCC-00074	477	.	A	C	.	PASS	.
ERCC-00074	478	.	A	C	.	PASS	.
ERCC-00074	479	.	A	C	.	PASS	.
ERCC-00074	480	.	A	C	.	PASS	.
ERCC-00074	481	.	A	C	.	PASS	.
ERCC-00074	482	.	A	C	.	PASS	.
ERCC-00074	483	.	A	C	.	PASS	.
ERCC-00074	484	.	A	C	.	PASS	.
ERCC-00074	485	.	A	C	.	PASS	.
ERCC-00074	486	.	A	C	.	PASS	.
ERCC-00074	487	.	A	C	.	PASS	.
ERCC-00074	488	.	A	C	.	PASS	.
ERCC-00074	489	.	A	C	.	PASS	.
ERCC-00074	490	.	A	C	.	PASS	.
ERCC-00074	491	.	A	C	.	PASS	.
ERCC-00074	492	.	A	C	.	PASS	.
ERCC-00074	493	.	A	C	.	PASS	.
ERCC-00074	494	.	A	C	.	PASS	.
ERCC-00074	495	.	A	C	.	PASS	.
ERCC-00074	499	.	A	C	.	PASS	.
ERCC-00074	500	.	A	C	.	PASS	.
ERCC-00074	501	.	A	C	.	PASS	.
ERCC-00074	502	.	A	C	.	PASS	.
ERCC-00074	503	.	A	C	.	PASS	.
ERCC-00074	504	.	A	C	.	PASS	.
ERCC-00074	505	.	A	C	.	PASS	.
ERCC-00074	506	.	A	C	.	PASS	.
ERCC-00074	507	.	A	C	.	PASS	.
ERCC-00074	508	.	A	C	.	PASS	.
ERCC-00074	509	.	A	C	.	PASS	.
ERCC-00074	510	.	A	C	.	PASS	.
ERCC-00074	511	.	A	C	.	PASS	.
ERCC-00074	512	.	A	C	.	PASS	.
ERCC-00074	513	.	A	C	.	PASS	.
ERCC-00074	514	.	A	C	.	PASS	.
ERCC-00074	515	.	A	C	.	PASS	.
ERCC-00074	516	.	A	C	.	PASS	.
ERCC-00074	517	.	A	C	.	PASS	.
ERCC-00074	518	.	A	C	.	PASS	.
ERCC-00074	519	.	A	C	.	PASS	.
ERCC-00074	520	.	A	C	.	PASS	.
ERCC-00074	521	.	A	C	.	PASS	.
ERCC-00074	522	.	A	C	.	PASS	.
ERCC-00075	940	.	A	C	.	PASS	.
ERCC-00075	941	.	A	C	.	PASS	.
ERCC-00075	942	.	A	C	.	PASS	.
ERCC-00075	943	.	A	C	.	PASS	.
ERCC-00075	944	.	A	C	.	PASS	.
ERCC-00075	945	.	A	C	.	PASS	.
ERCC-00075	946	.	A	C	.	PASS	.
ERCC-00075	947	.	A	C	.	PASS	.
ERCC-00075	948	.	A	C	.	PASS	.
ERCC-00075	949	.	A	C	.	PASS	.
ERCC-00075	950	.	A	C	.	PASS	.
ERCC-00075	951	.	A	C	.	PASS	.
ERCC-00075	952	.	A	C	.	PASS	.
ERCC-00075	953	.	A	C	.	PASS	.
ERCC-00075	954	.	A	C	.	PASS	.
ERCC-00075	955	.	A	C	.	PASS	.
ERCC-00075	956	.	A	C	.	PASS	.
ERCC-00075	957	.	A	C	.	PASS	.
ERCC-00075	958	.	A	C	.	PASS	.
ERCC-00075	959	.	A	C	.	PASS	.
ERCC-00075	960	.	A	C	.	PASS	.
ERCC-00075	961	.	A	C	.	PASS	.
ERCC-00075	962	.	A	C	.	PASS	.
ERCC-00075	963	.	A	C	.	PASS	.
ERCC-00075	964	.	A	C	.	PASS	.
ERCC-00075	965	.	A	C	.	PASS	.
ERCC-00075	966	.	A	C	.	PASS	.
ERCC-00075	967	.	A	C	.	PASS	.
ERCC-00075	968	.	A	C	.	PASS	.
ERCC-00075	969	.	A	C	.	PASS	.
ERCC-00075	970	.	A	C	.	PASS	.
ERCC-00075	971	.	A	C	.	PASS	.
ERCC-00075	972	.	A	C	.	PASS	.
ERCC-00075	973	.	A	C	.	PASS	.
ERCC-00075	974	.	A	C	.	PASS	.
ERCC-00075	975	.	A	C	.	PASS	.
ERCC-00075	976	.	A	C	.	PASS	.
ERCC-00075	977	.	A	C	.	PASS	.
ERCC-00075	978	.	A	C	.	PASS	.
ERCC-00075	979	.	A	C	.	PASS	.
ERCC-00075	980	.	A	C	.	PASS	.
ERCC-00075	981	.	A	C	.	PASS	.
ERCC-00075	982	.	A	C	.	PASS	.
ERCC-00075	983	.	A	C	.	PASS	.
ERCC-00075	984	.	A	C	.	PASS	.
ERCC-00075	985	.	A	C	.	PASS	.
ERCC-00075	986	.	A	C	.	PASS	.
ERCC-00075	987	.	A	C	.	PASS	.
ERCC-00075	988	.	A	C	.	PASS	.
ERCC-00075	989	.	A	C	.	PASS	.
ERCC-00075	990	.	A	C	.	PASS	.
ERCC-00075	1000	.	A	C	.	PASS	.
ERCC-00075	1001	.	A	C	.	PASS	.
ERCC-00075	1002	.	A	C	.	PASS	.
ERCC-00075	1003	.	A	C	.	PASS	.
ERCC-00075	1004	.	A	C	.	PASS	.
ERCC-00075	1005	.	A	C	.	PASS	.
ERCC-00075	1006	.	A	C	.	PASS	.
ERCC-00075	1007	.	A	C	.	PASS	.
ERCC-00075	1008	.	A	C	.	PASS	.
ERCC-00075	1009	.	A	C	.	PASS	.
ERCC-00075	1010	.	A	C	.	PASS	.
ERCC-00075	1011	.	A	C	.	PASS	.
ERCC-00075	1012	.	A	C	.	PASS	.
ERCC-00075	1013	.	A	C	.	PASS	.
ERCC-00075	1014	.	A	C	.	PASS	.
ERCC-00075	1015	.	A	C	.	PASS	.
ERCC-00075	1016	.	A	C	.	PASS	.
ERCC-00075	1017	.	A	C	.	PASS	.
ERCC-00075	1018	.	A	C	.	PASS	.
ERCC-00075	1019	.	A	C	.	PASS	.
ERCC-00075	1020	.	A	C	.	PASS	.
ERCC-00075	1021	.	A	C	.	PASS	.
ERCC-00075	1022	.	A	C	.	PASS	.
ERCC-00075	1023	.	A	C	.	PASS	.
ERCC-00076	566	.	A	C	.	PASS	.
ERCC-00076	567	.	A	C	.	PASS	.
ERCC-00076	568	.	A	C	.	PASS	.
ERCC-00076	569	.	A	C	.	PASS	.
ERCC-00076	570	.	A	C	.	PASS	.
ERCC-00076	571	.	A	C	.	PASS	.
ERCC-00076	572	.	A	C	.	PASS	.
ERCC-00076	573	.	A	C	.	PASS	.
ERCC-00076	574	.	A	C	.	PASS	.
ERCC-00076	575	.	A	C	.	PASS	.
ERCC-00076	576	.	A	C	.	PASS	.
ERCC-00076	577	.	A	C	.	PASS	.
ERCC-00076	578	.	A	C	.	PASS	.
ERCC-00076	579	.	A	C	.	PASS	.
ERCC-00076	580	.	A	C	.	PASS	.
ERCC-00076	581	.	A	C	.	PASS	.
ERCC-00076	582	.	A	C	.	PASS	.
ERCC-00076	583	.	A	C	.	PASS	.
ERCC-00076	584	.	A	C	.	PASS	.
ERCC-00076	585	.	A	C	.	PASS	.
ERCC-00076	586	.	A	C	.	PASS	.
ERCC-00076	587	.	A	C	.	PASS	.
ERCC-00076	588	.	A	C	.	PASS	.
ERCC-00076	589	.	A	C	.	PASS	.
ERCC-00076	590	.	A	C	.	PASS	.
ERCC-00076	591	.	A	C	.	PASS	.
ERCC-00076	592	.	A	C	.	PASS	.
ERCC-00076	593	.	A	C	.	PASS	.
ERCC-00076	594	.	A	C	.	PASS	.
ERCC-00076	595	.	A	C	.	PASS	.
ERCC-00076	596	.	A	C	.	PASS	.
ERCC-00076	597	.	A	C	.	PASS	.
ERCC-00076	598	.	A	C	.	PASS	.
ERCC-00076	599	.	A	C	.	PASS	.
ERCC-00076	600	.	A	C	.	PASS	.
ERCC-00076	601	.	A	C	.	PASS	.
ERCC-00076	602	.	A	C	.	PASS	.
ERCC-00076	603	.	A	C	.	PASS	.
ERCC-00076	604	.	A	C	.	PASS	.
ERCC-00076	605	.	A	C	.	PASS	.
ERCC-00076	606	.	A	C	.	PASS	.
ERCC-00076	607	.	A	C	.	PASS	.
ERCC-00076	608	.	A	C	.	PASS	.
ERCC-00076	609	.	A	C	.	PASS	.
ERCC-00076	610	.	A	C	.	PASS	.
ERCC-00076	611	.	A	C	.	PASS	.
ERCC-00076	612	.	A	C	.	PASS	.
ERCC-00076	613	.	A	C	.	PASS	.
ERCC-00076	614	.	A	C	.	PASS	.
ERCC-00076	615	.	A	C	.	PASS	.
ERCC-00076	616	.	A	C	.	PASS	.
ERCC-00076	619	.	A	C	.	PASS	.
ERCC-00076	620	.	A	C	.	PASS	.
ERCC-00076	621	.	A	C	.	PASS	.
ERCC-00076	622	.	A	C	.	PASS	.
ERCC-00076	623	.	A	C	.	PASS	.
ERCC-00076	624	.	A	C	.	PASS	.
ERCC-00076	625	.	A	C	.	PASS	.
ERCC-00076	626	.	A	C	.	PASS	.
ERCC-00076	627	.	A	C	.	PASS	.
ERCC-00076	628	.	A	C	.	PASS	.
ERCC-00076	629	.	A	C	.	PASS	.
ERCC-00076	630	.	A	C	.	PASS	.
ERCC-00076	631	.	A	C	.	PASS	.
ERCC-00076	632	.	A	C	.	PASS	.
ERCC-00076	633	.	A	C	.	PASS	.
ERCC-00076	634	.	A	C	.	PASS	.
ERCC-00076	635	.	A	C	.	PASS	.
ERCC-00076	636	.	A	C	.	PASS	.
ERCC-00076	637	.	A	C	.	PASS	.
ERCC-00076	638	.	A	C	.	PASS	.
ERCC-00076	639	.	A	C	.	PASS	.
ERCC-00076	640	.	A	C	.	PASS	.
ERCC-00076	641	.	A	C	.	PASS	.
ERCC-00076	642	.	A	C	.	PASS	.
ERCC-00077	198	.	A	C	.	PASS	.
ERCC-00077	199	.	A	C	.	PASS	.
ERCC-00077	200	.	A	C	.	PASS	.
ERCC-00077	201	.	A	C	.	PASS	.
ERCC-00077	202	.	A	C	.	PASS	.
ERCC-00077	203	.	A	C	.	PASS	.
ERCC-00077	204	.	A	C	.	PASS	.
ERCC-00077	205	.	A	C	.	PASS	.
ERCC-00077	206	.	A	C	.	PASS	.
ERCC-00077	207	.	A	C	.	PASS	.
ERCC-00077	208	.	A	C	.	PASS	.
ERCC-00077	209	.	A	C	.	PASS	.
ERCC-00077	210	.	A	C	.	PASS	.
ERCC-00077	211	.	A	C	.	PASS	.
ERCC-00077	212	.	A	C	.	PASS	.
ERCC-00077	213	.	A	C	.	PASS	.
ERCC-00077	214	.	A	C	.	PASS	.
ERCC-00077	215	.	A	C	.	PASS	.
ERCC-00077	216	.	A	C	.	PASS	.
ERCC-00077	217	.	A	C	.	PASS	.
ERCC-00077	218	.	A	C	.	PASS	.
ERCC-00077	219	.	A	C	.	PASS	.
ERCC-00077	220	.	A	C	.	PASS	.
ERCC-00077	221	.	A	C	.	PASS	.
ERCC-00077	222	.	A	C	.	PASS	.
ERCC-00077	223	.	A	C	.	PASS	.
ERCC-00077	224	.	A	C	.	PASS	.
ERCC-00077	225	.	A	C	.	PASS	.
ERCC-00077	226	.	A	C	.	PASS	.
ERCC-00077	227	.	A	C	.	PASS	.
ERCC-00077	228	.	A	C	.	PASS	.
ERCC-00077	229	.	A	C	.	PASS	.
ERCC-00077	230	.	A	C	.	PASS	.
ERCC-00077	231	.	A	C	.	PASS	.
ERCC-00077	232	.	A	C	.	PASS	.
ERCC-00077	233	.	A	C	.	PASS	.
ERCC-00077	234	.	A	C	.	PASS	.
ERCC-00077	235	.	A	C	.	PASS	.
ERCC-00077	236	.	A	C	.	PASS	.
ERCC-00077	237	.	A	C	.	PASS	.
ERCC-00077	238	.	A	C	.	PASS	.
ERCC-00077	239	.	A	C	.	PASS	.
ERCC-00077	240	.	A	C	.	PASS	.
ERCC-00077	241	.	A	C	.	PASS	.
ERCC-00077	242	.	A	C	.	PASS	.
ERCC-00077	243	.	A	C	.	PASS	.
ERCC-00077	244	.	A	C	.	PASS	.
ERCC-00077	245	.	A	C	.	PASS	.
ERCC-00077	246	.	A	C	.	PASS	.
ERCC-00077	247	.	A	C	.	PASS	.
ERCC-00077	248	.	A	C	.	PASS	.
ERCC-00077	251	.	A	C	.	PASS	.
ERCC-00077	252	.	A	C	.	PASS	.
ERCC-00077	253	.	A	C	.	PASS	.
ERCC-00077	254	.	A	C	.	PASS	.
ERCC-00077	255	.	A	C	.	PASS	.
ERCC-00077	256	.	A	C	.	PASS	.
ERCC-00077	257	.	A	C	.	PASS	.
ERCC-00077	258	.	A	C	.	PASS	.
ERCC-00077	259	.	A	C	.	PASS	.
ERCC-00077	260	.	A	C	.	PASS	.
ERCC-00077	261	.	A	C	.	PASS	.
ERCC-00077	262	.	A	C	.	PASS	.
ERCC-00077	263	.	A	C	.	PASS	.
ERCC-00077	264	.	A	C	.	PASS	.
ERCC-00077	265	.	A	C	.	PASS	.
ERCC-00077	266	.	A	C	.	PASS	.
ERCC-00077	267	.	A	C	.	PASS	.
ERCC-00077	268	.	A	C	.	PASS	.
ERCC-00077	269	.	A	C	.	PASS	.
ERCC-00077	270	.	A	C	.	PASS	.
ERCC-00077	271	.	A	C	.	PASS	.
ERCC-00077	272	.	A	C	.	PASS	.
ERCC-00077	273	.	A	C	.	PASS	.
ERCC-00078	912	.	A	C	.	PASS	.
ERCC-00078	913	.	A	C	.	PASS	.
ERCC-00078	914	.	A	C	.	PASS	.
ERCC-00078	915	.	A	C	.	PASS	.
ERCC-00078	916	.	A	C	.	PASS	.
ERCC-00078	917	.	A	C	.	PASS	.
ERCC-00078	918	.	A	C	.	PASS	.
ERCC-00078	919	.	A	C	.	PASS	.
ERCC-00078	920	.	A	C	.	PASS	.
ERCC-00078	921	.	A	C	.	PASS	.
ERCC-00078	922	.	A	C	.	PASS	.
ERCC-00078	923	.	A	C	.	PASS	.
ERCC-00078	924	.	A	C	.	PASS	.
ERCC-00078	925	.	A	C	.	PASS	.
ERCC-00078	926	.	A	C	.	PASS	.
ERCC-00078	927	.	A	C	.	PASS	.
ERCC-00078	928	.	A	C	.	PASS	.
ERCC-00078	929	.	A	C	.	PASS	.
ERCC-00078	930	.	A	C	.	PASS	.
ERCC-00078	931	.	A	C	.	PASS	.
ERCC-00078	932	.	A	C	.	PASS	.
ERCC-00078	933	.	A	C	.	PASS	.
ERCC-00078	934	.	A	C	.	PASS	.
ERCC-00078	935	.	A	C	.	PASS	.
ERCC-00078	936	.	A	C	.	PASS	.
ERCC-00078	937	.	A	C	.	PASS	.
ERCC-00078	938	.	A	C	.	PASS	.
ERCC-00078	939	.	A	C	.	PASS	.
ERCC-00078	940	.	A	C	.	PASS	.
ERCC-00078	941	.	A	C	.	PASS	.
ERCC-00078	942	.	A	C	.	PASS	.
ERCC-00078	943	.	A	C	.	PASS	.
ERCC-00078	944	.	A	C	.	PASS	.
ERCC-00078	945	.	A	C	.	PASS	.
ERCC-00078	946	.	A	C	.	PASS	.
ERCC-00078	947	.	A	C	.	PASS	.
ERCC-00078	948	.	A	C	.	PASS	.
ERCC-00078	949	.	A	C	.	PASS	.
ERCC-00078	950	.	A	C	.	PASS	.
ERCC-00078	951	.	A	C	.	PASS	.
ERCC-00078	952	.	A	C	.	PASS	.
ERCC-00078	953	.	A	C	.	PASS	.
ERCC-00078	954	.	A	C	.	PASS	.
ERCC-00078	955	.	A	C	.	PASS	.
ERCC-00078	956	.	A	C	.	PASS	.
ERCC-00078	957	.	A	C	.	PASS	.
ERCC-00078	958	.	A	C	.	PASS	.
ERCC-00078	959	.	A	C	.	PASS	.
ERCC-00078	960	.	A	C	.	PASS	.
ERCC-00078	961	.	A	C	.	PASS	.
ERCC-00078	962	.	A	C	.	PASS	.
ERCC-00078	970	.	A	C	.	PASS	.
ERCC-00078	971	.	A	C	.	PASS	.
ERCC-00078	972	.	A	C	.	PASS	.
ERCC-00078	973	.	A	C	.	PASS	.
ERCC-00078	974	.	A	C	.	PASS	.
ERCC-00078	975	.	A	C	.	PASS	.
ERCC-00078	976	.	A	C	.	PASS	.
ERCC-00078	977	.	A	C	.	PASS	.
ERCC-00078	978	.	A	C	.	PASS	.
ERCC-00078	979	.	A	C	.	PASS	.
ERCC-00078	980	.	A	C	.	PASS	.
ERCC-00078	981	.	A	C	.	PASS	.
ERCC-00078	982	.	A	C	.	PASS	.
ERCC-00078	983	.	A	C	.	PASS	.
ERCC-00078	984	.	A	C	.	PASS	.
ERCC-00078	985	.	A	C	.	PASS	.
ERCC-00078	986	.	A	C	.	PASS	.
ERCC-00078	987	.	A	C	.	PASS	.
ERCC-00078	988	.	A	C	.	PASS	.
ERCC-00078	989	.	A	C	.	PASS	.
ERCC-00078	990	.	A	C	.	PASS	.
ERCC-00078	991	.	A	C	.	PASS	.
ERCC-00078	992	.	A	C	.	PASS	.
ERCC-00078	993	.	A	C	.	PASS	.
ERCC-00079	568	.	A	C	.	PASS	.
ERCC-00079	569	.	A	C	.	PASS	.
ERCC-00079	570	.	A	C	.	PASS	.
ERCC-00079	571	.	A	C	.	PASS	.
ERCC-00079	572	.	A	C	.	PASS	.
ERCC-00079	573	.	A	C	.	PASS	.
ERCC-00079	574	.	A	C	.	PASS	.
ERCC-00079	575	.	A	C	.	PASS	.
ERCC-00079	576	.	A	C	.	PASS	.
ERCC-00079	577	.	A	C	.	PASS	.
ERCC-00079	578	.	A	C	.	PASS	.
ERCC-00079	579	.	A	C	.	PASS	.
ERCC-00079	580	.	A	C	.	PASS	.
ERCC-00079	581	.	A	C	.	PASS	.
ERCC-00079	582	.	A	C	.	PASS	.
ERCC-00079	583	.	A	C	.	PASS	.
ERCC-00079	584	.	A	C	.	PASS	.
ERCC-00079	585	.	A	C	.	PASS	.
ERCC-00079	586	.	A	C	.	PASS	.
ERCC-00079	587	.	A	C	.	PASS	.
ERCC-00079	588	.	A	C	.	PASS	.
ERCC-00079	589	.	A	C	.	PASS	.
ERCC-00079	590	.	A	C	.	PASS	.
ERCC-00079	591	.	A	C	.	PASS	.
ERCC-00079	592	.	A	C	.	PASS	.
ERCC-00079	593	.	A	C	.	PASS	.
ERCC-00079	594	.	A	C	.	PASS	.
ERCC-00079	595	.	A	C	.	PASS	.
ERCC-00079	596	.	A	C	.	PASS	.
ERCC-00079	597	.	A	C	.	PASS	.
ERCC-00079	598	.	A	C	.	PASS	.
ERCC-00079	599	.	A	C	.	PASS	.
ERCC-00079	600	.	A	C	.	PASS	.
ERCC-00079	601	.	A	C	.	PASS	.
ERCC-00079	602	.	A	C	.	PASS	.
ERCC-00079	603	.	A	C	.	PASS	.
ERCC-00079	604	.	A	C	.	PASS	.
ERCC-00079	605	.	A	C	.	PASS	.
ERCC-00079	606	.	A	C	.	PASS	.
ERCC-00079	607	.	A	C	.	PASS	.
ERCC-00079	608	.	A	C	.	PASS	.
ERCC-00079	609	.	A	C	.	PASS	.
ERCC-00079	610	.	A	C	.	PASS	.
ERCC-00079	611	.	A	C	.	PASS	.
ERCC-00079	612	.	A	C	.	PASS	.
ERCC-00079	613	.	A	C	.	PASS	.
ERCC-00079	614	.	A	C	.	PASS	.
ERCC-00079	615	.	A	C	.	PASS	.
ERCC-00079	616	.	A	C	.	PASS	.
ERCC-00079	617	.	A	C	.	PASS	.
ERCC-00079	618	.	A	C	.	PASS	.
ERCC-00079	621	.	A	C	.	PASS	.
ERCC-00079	622	.	A	C	.	PASS	.
ERCC-00079	623	.	A	C	.	PASS	.
ERCC-00079	624	.	A	C	.	PASS	.
ERCC-00079	625	.	A	C	.	PASS	.
ERCC-00079	626	.	A	C	.	PASS	.
ERCC-00079	627	.	A	C	.	PASS	.
ERCC-00079	628	.	A	C	.	PASS	.
ERCC-00079	629	.	A	C	.	PASS	.
ERCC-00079	630	.	A	C	.	PASS	.
ERCC-00079	631	.	A	C	.	PASS	.
ERCC-00079	632	.	A	C	.	PASS	.
ERCC-00079	633	.	A	C	.	PASS	.
ERCC-00079	634	.	A	C	.	PASS	.
ERCC-00079	635	.	A	C	.	PASS	.
ERCC-00079	636	.	A	C	.	PASS	.
ERCC-00079	637	.	A	C	.	PASS	.
ERCC-00079	638	.	A	C	.	PASS	.
ERCC-00079	639	.	A	C	.	PASS	.
ERCC-00079	640	.	A	C	.	PASS	.
ERCC-00079	641	.	A	C	.	PASS	.
ERCC-00079	642	.	A	C	.	PASS	.
ERCC-00079	643	.	A	C	.	PASS	.
ERCC-00079	644	.	A	C	.	PASS	.
ERCC-00081	455	.	A	C	.	PASS	.
ERCC-00081	456	.	A	C	.	PASS	.
ERCC-00081	457	.	A	C	.	PASS	.
ERCC-00081	458	.	A	C	.	PASS	.
ERCC-00081	459	.	A	C	.	PASS	.
ERCC-00081	460	.	A	C	.	PASS	.
ERCC-00081	461	.	A	C	.	PASS	.
ERCC-00081	462	.	A	C	.	PASS	.
ERCC-00081	463	.	A	C	.	PASS	.
ERCC-00081	464	.	A	C	.	PASS	.
ERCC-00081	465	.	A	C	.	PASS	.
ERCC-00081	466	.	A	C	.	PASS	.
ERCC-00081	467	.	A	C	.	PASS	.
ERCC-00081	468	.	A	C	.	PASS	.
ERCC-00081	469	.	A	C	.	PASS	.
ERCC-00081	470	.	A	C	.	PASS	.
ERCC-00081	471	.	A	C	.	PASS	.
ERCC-00081	472	.	A	C	.	PASS	.
ERCC-00081	473	.	A	C	.	PASS	.
ERCC-00081	474	.	A	C	.	PASS	.
ERCC-00081	475	.	A	C	.	PASS	.
ERCC-00081	476	.	A	C	.	PASS	.
ERCC-00081	477	.	A	C	.	PASS	.
ERCC-00081	478	.	A	C	.	PASS	.
ERCC-00081	479	.	A	C	.	PASS	.
ERCC-00081	480	.	A	C	.	PASS	.
ERCC-00081	481	.	A	C	.	PASS	.
ERCC-00081	482	.	A	C	.	PASS	.
ERCC-00081	483	.	A	C	.	PASS	.
ERCC-00081	484	.	A	C	.	PASS	.
ERCC-00081	485	.	A	C	.	PASS	.
ERCC-00081	486	.	A	C	.	PASS	.
ERCC-00081	487	.	A	C	.	PASS	.
ERCC-00081	488	.	A	C	.	PASS	.
ERCC-00081	489	.	A	C	.	PASS	.
ERCC-00081	490	.	A	C	.	PASS	.
ERCC-00081	491	.	A	C	.	PASS	.
ERCC-00081	492	.	A	C	.	PASS	.
ERCC-00081	493	.	A	C	.	PASS	.
ERCC-00081	494	.	A	C	.	PASS	.
ERCC-00081	495	.	A	C	.	PASS	.
ERCC-00081	496	.	A	C	.	PASS	.
ERCC-00081	497	.	A	C	.	PASS	.
ERCC-00081	498	.	A	C	.	PASS	.
ERCC-00081	499	.	A	C	.	PASS	.
ERCC-00081	500	.	A	C	.	PASS	.
ERCC-00081	501	.	A	C	.	PASS	.
ERCC-00081	502	.	A	C	.	PASS	.
ERCC-00081	503	.	A	C	.	PASS	.
ERCC-00081	504	.	A	C	.	PASS	.
ERCC-00081	505	.	A	C	.	PASS	.
ERCC-00081	510	.	A	C	.	PASS	.
ERCC-00081	511	.	A	C	.	PASS	.
ERCC-00081	512	.	A	C	.	PASS	.
ERCC-00081	513	.	A	C	.	PASS	.
ERCC-00081	514	.	A	C	.	PASS	.
ERCC-00081	515	.	A	C	.	PASS	.
ERCC-00081	516	.	A	C	.	PASS	.
ERCC-00081	517	.	A	C	.	PASS	.
ERCC-00081	518	.	A	C	.	PASS	.
ERCC-00081	519	.	A	C	.	PASS	.
ERCC-00081	520	.	A	C	.	PASS	.
ERCC-00081	521	.	A	C	.	PASS	.
ERCC-00081	522	.	A	C	.	PASS	.
ERCC-00081	523	.	A	C	.	PASS	.
ERCC-00081	524	.	A	C	.	PASS	.
ERCC-00081	525	.	A	C	.	PASS	.
ERCC-00081	526	.	A	C	.	PASS	.
ERCC-00081	527	.	A	C	.	PASS	.
ERCC-00081	528	.	A	C	.	PASS	.
ERCC-00081	529	.	A	C	.	PASS	.
ERCC-00081	530	.	A	C	.	PASS	.
ERCC-00081	531	.	A	C	.	PASS	.
ERCC-00081	532	.	A	C	.	PASS	.
ERCC-00081	533	.	A	C	.	PASS	.
ERCC-00081	534	.	A	C	.	PASS	.
ERCC-00083	309	.	A	C	.	PASS	.
ERCC-00083	931	.	A	C	.	PASS	.
ERCC-00083	932	.	A	C	.	PASS	.
ERCC-00083	933	.	A	C	.	PASS	.
ERCC-00083	934	.	A	C	.	PASS	.
ERCC-00083	935	.	A	C	.	PASS	.
ERCC-00083	936	.	A	C	.	PASS	.
ERCC-00083	937	.	A	C	.	PASS	.
ERCC-00083	938	.	A	C	.	PASS	.
ERCC-00083	939	.	A	C	.	PASS	.
ERCC-00083	940	.	A	C	.	PASS	.
ERCC-00083	941	.	A	C	.	PASS	.
ERCC-00083	942	.	A	C	.	PASS	.
ERCC-00083	943	.	A	C	.	PASS	.
ERCC-00083	944	.	A	C	.	PASS	.
ERCC-00083	945	.	A	C	.	PASS	.
ERCC-00083	946	.	A	C	.	PASS	.
ERCC-00083	947	.	A	C	.	PASS	.
ERCC-00083	948	.	A	C	.	PASS	.
ERCC-00083	949	.	A	C	.	PASS	.
ERCC-00083	950	.	A	C	.	PASS	.
ERCC-00083	951	.	A	C	.	PASS	.
ERCC-00083	952	.	A	C	.	PASS	.
ERCC-00083	953	.	A	C	.	PASS	.
ERCC-00083	954	.	A	C	.	PASS	.
ERCC-00083	955	.	A	C	.	PASS	.
ERCC-00083	956	.	A	C	.	PASS	.
ERCC-00083	957	.	A	C	.	PASS	.
ERCC-00083	958	.	A	C	.	PASS	.
ERCC-00083	959	.	A	C	.	PASS	.
ERCC-00083	960	.	A	C	.	PASS	.
ERCC-00083	961	.	A	C	.	PASS	.
ERCC-00083	962	.	A	C	.	PASS	.
ERCC-00083	963	.	A	C	.	PASS	.
ERCC-00083	964	.	A	C	.	PASS	.
ERCC-00083	965	.	A	C	.	PASS	.
ERCC-00083	966	.	A	C	.	PASS	.
ERCC-00083	967	.	A	C	.	PASS	.
ERCC-00083	968	.	A	C	.	PASS	.
ERCC-00083	969	.	A	C	.	PASS	.
ERCC-00083	970	.	A	C	.	PASS	.
ERCC-00083	971	.	A	C	.	PASS	.
ERCC-00083	972	.	A	C	.	PASS	.
ERCC-00083	973	.	A	C	.	PASS	.
ERCC-00083	974	.	A	C	.	PASS	.
ERCC-00083	975	.	A	C	.	PASS	.
ERCC-00083	976	.	A	C	.	PASS	.
ERCC-00083	977	.	A	C	.	PASS	.
ERCC-00083	978	.	A	C	.	PASS	.
ERCC-00083	979	.	A	C	.	PASS	.
ERCC-00083	980	.	A	C	.	PASS	.
ERCC-00083	981	.	A	C	.	PASS	.
ERCC-00083	1000	.	A	C	.	PASS	.
ERCC-00083	1001	.	A	C	.	PASS	.
ERCC-00083	1002	.	A	C	.	PASS	.
ERCC-00083	1003	.	A	C	.	PASS	.
ERCC-00083	1004	.	A	C	.	PASS	.
ERCC-00083	1005	.	A	C	.	PASS	.
ERCC-00083	1006	.	A	C	.	PASS	.
ERCC-00083	1007	.	A	C	.	PASS	.
ERCC-00083	1008	.	A	C	.	PASS	.
ERCC-00083	1009	.	A	C	.	PASS	.
ERCC-00083	1010	.	A	C	.	PASS	.
ERCC-00083	1011	.	A	C	.	PASS	.
ERCC-00083	1012	.	A	C	.	PASS	.
ERCC-00083	1013	.	A	C	.	PASS	.
ERCC-00083	1014	.	A	C	.	PASS	.
ERCC-00083	1015	.	A	C	.	PASS	.
ERCC-00083	1016	.	A	C	.	PASS	.
ERCC-00083	1017	.	A	C	.	PASS	.
ERCC-00083	1018	.	A	C	.	PASS	.
ERCC-00083	1019	.	A	C	.	PASS	.
ERCC-00083	1020	.	A	C	.	PASS	.
ERCC-00083	1021	.	A	C	.	PASS	.
ERCC-00083	1022	.	A	C	.	PASS	.
ERCC-00083	1023	.	A	C	.	PASS	.
ERCC-00084	917	.	A	C	.	PASS	.
ERCC-00084	918	.	A	C	.	PASS	.
ERCC-00084	919	.	A	C	.	PASS	.
ERCC-00084	920	.	A	C	.	PASS	.
ERCC-00084	921	.	A	C	.	PASS	.
ERCC-00084	922	.	A	C	.	PASS	.
ERCC-00084	923	.	A	C	.	PASS	.
ERCC-00084	924	.	A	C	.	PASS	.
ERCC-00084	925	.	A	C	.	PASS	.
ERCC-00084	926	.	A	C	.	PASS	.
ERCC-00084	927	.	A	C	.	PASS	.
ERCC-00084	928	.	A	C	.	PASS	.
ERCC-00084	929	.	A	C	.	PASS	.
ERCC-00084	930	.	A	C	.	PASS	.
ERCC-00084	931	.	A	C	.	PASS	.
ERCC-00084	932	.	A	C	.	PASS	.
ERCC-00084	933	.	A	C	.	PASS	.
ERCC-00084	934	.	A	C	.	PASS	.
ERCC-00084	935	.	A	C	.	PASS	.
ERCC-00084	936	.	A	C	.	PASS	.
ERCC-00084	937	.	A	C	.	PASS	.
ERCC-00084	938	.	A	C	.	PASS	.
ERCC-00084	939	.	A	C	.	PASS	.
ERCC-00084	940	.	A	C	.	PASS	.
ERCC-00084	941	.	A	C	.	PASS	.
ERCC-00084	942	.	A	C	.	PASS	.
ERCC-00084	943	.	A	C	.	PASS	.
ERCC-00084	944	.	A	C	.	PASS	.
ERCC-00084	945	.	A	C	.	PASS	.
ERCC-00084	946	.	A	C	.	PASS	.
ERCC-00084	947	.	A	C	.	PASS	.
ERCC-00084	948	.	A	C	.	PASS	.
ERCC-00084	949	.	A	C	.	PASS	.
ERCC-00084	950	.	A	C	.	PASS	.
ERCC-00084	951	.	A	C	.	PASS	.
ERCC-00084	952	.	A	C	.	PASS	.
ERCC-00084	953	.	A	C	.	PASS	.
ERCC-00084	954	.	A	C	.	PASS	.
ERCC-00084	955	.	A	C	.	PASS	.
ERCC-00084	956	.	A	C	.	PASS	.
ERCC-00084	957	.	A	C	.	PASS	.
ERCC-00084	958	.	A	C	.	PASS	.
ERCC-00084	959	.	A	C	.	PASS	.
ERCC-00084	960	.	A	C	.	PASS	.
ERCC-00084	961	.	A	C	.	PASS	.
ERCC-00084	962	.	A	C	.	PASS	.
ERCC-00084	963	.	A	C	.	PASS	.
ERCC-00084	964	.	A	C	.	PASS	.
ERCC-00084	965	.	A	C	.	PASS	.
ERCC-00084	966	.	A	C	.	PASS	.
ERCC-00084	967	.	A	C	.	PASS	.
ERCC-00084	971	.	A	C	.	PASS	.
ERCC-00084	972	.	A	C	.	PASS	.
ERCC-00084	973	.	A	C	.	PASS	.
ERCC-00084	974	.	A	C	.	PASS	.
ERCC-00084	975	.	A	C	.	PASS	.
ERCC-00084	976	.	A	C	.	PASS	.
ERCC-00084	977	.	A	C	.	PASS	.
ERCC-00084	978	.	A	C	.	PASS	.
ERCC-00084	979	.	A	C	.	PASS	.
ERCC-00084	980	.	A	C	.	PASS	.
ERCC-00084	981	.	A	C	.	PASS	.
ERCC-00084	982	.	A	C	.	PASS	.
ERCC-00084	983	.	A	C	.	PASS	.
ERCC-00084	984	.	A	C	.	PASS	.
ERCC-00084	985	.	A	C	.	PASS	.
ERCC-00084	986	.	A	C	.	PASS	.
ERCC-00084	987	.	A	C	.	PASS	.
ERCC-00084	988	.	A	C	.	PASS	.
ERCC-00084	989	.	A	C	.	PASS	.
ERCC-00084	990	.	A	C	.	PASS	.
ERCC-00084	991	.	A	C	.	PASS	.
ERCC-00084	992	.	A	C	.	PASS	.
ERCC-00084	993	.	A	C	.	PASS	.
ERCC-00084	994	.	A	C	.	PASS	.
ERCC-00085	766	.	A	C	.	PASS	.
ERCC-00085	767	.	A	C	.	PASS	.
ERCC-00085	768	.	A	C	.	PASS	.
ERCC-00085	769	.	A	C	.	PASS	.
ERCC-00085	770	.	A	C	.	PASS	.
ERCC-00085	771	.	A	C	.	PASS	.
ERCC-00085	772	.	A	C	.	PASS	.
ERCC-00085	773	.	A	C	.	PASS	.
ERCC-00085	774	.	A	C	.	PASS	.
ERCC-00085	775	.	A	C	.	PASS	.
ERCC-00085	776	.	A	C	.	PASS	.
ERCC-00085	777	.	A	C	.	PASS	.
ERCC-00085	778	.	A	C	.	PASS	.
ERCC-00085	779	.	A	C	.	PASS	.
ERCC-00085	780	.	A	C	.	PASS	.
ERCC-00085	781	.	A	C	.	PASS	.
ERCC-00085	782	.	A	C	.	PASS	.
ERCC-00085	783	.	A	C	.	PASS	.
ERCC-00085	784	.	A	C	.	PASS	.
ERCC-00085	785	.	A	C	.	PASS	.
ERCC-00085	786	.	A	C	.	PASS	.
ERCC-00085	787	.	A	C	.	PASS	.
ERCC-00085	788	.	A	C	.	PASS	.
ERCC-00085	789	.	A	C	.	PASS	.
ERCC-00085	790	.	A	C	.	PASS	.
ERCC-00085	791	.	A	C	.	PASS	.
ERCC-00085	792	.	A	C	.	PASS	.
ERCC-00085	793	.	A	C	.	PASS	.
ERCC-00085	794	.	A	C	.	PASS	.
ERCC-00085	795	.	A	C	.	PASS	.
ERCC-00085	796	.	A	C	.	PASS	.
ERCC-00085	797	.	A	C	.	PASS	.
ERCC-00085	798	.	A	C	.	PASS	.
ERCC-00085	799	.	A	C	.	PASS	.
ERCC-00085	800	.	A	C	.	PASS	.
ERCC-00085	801	.	A	C	.	PASS	.
ERCC-00085	802	.	A	C	.	PASS	.
ERCC-00085	803	.	A	C	.	PASS	.
ERCC-00085	804	.	A	C	.	PASS	.
ERCC-00085	805	.	A	C	.	PASS	.
ERCC-00085	806	.	A	C	.	PASS	.
ERCC-00085	807	.	A	C	.	PASS	.
ERCC-00085	808	.	A	C	.	PASS	.
ERCC-00085	809	.	A	C	.	PASS	.
ERCC-00085	810	.	A	C	.	PASS	.
ERCC-00085	811	.	A	C	.	PASS	.
ERCC-00085	812	.	A	C	.	PASS	.
ERCC-00085	813	.	A	C	.	PASS	.
ERCC-00085	814	.	A	C	.	PASS	.
ERCC-00085	815	.	A	C	.	PASS	.
ERCC-00085	816	.	A	C	.	PASS	.
ERCC-00085	821	.	A	C	.	PASS	.
ERCC-00085	822	.	A	C	.	PASS	.
ERCC-00085	823	.	A	C	.	PASS	.
ERCC-00085	824	.	A	C	.	PASS	.
ERCC-00085	825	.	A	C	.	PASS	.
ERCC-00085	826	.	A	C	.	PASS	.
ERCC-00085	827	.	A	C	.	PASS	.
ERCC-00085	828	.	A	C	.	PASS	.
ERCC-00085	829	.	A	C	.	PASS	.
ERCC-00085	830	.	A	C	.	PASS	.
ERCC-00085	831	.	A	C	.	PASS	.
ERCC-00085	832	.	A	C	.	PASS	.
ERCC-00085	833	.	A	C	.	PASS	.
ERCC-00085	834	.	A	C	.	PASS	.
ERCC-00085	835	.	A	C	.	PASS	.
ERCC-00085	836	.	A	C	.	PASS	.
ERCC-00085	837	.	A	C	.	PASS	.
ERCC-00085	838	.	A	C	.	PASS	.
ERCC-00085	839	.	A	C	.	PASS	.
ERCC-00085	840	.	A	C	.	PASS	.
ERCC-00085	841	.	A	C	.	PASS	.
ERCC-00085	842	.	A	C	.	PASS	.
ERCC-00085	843	.	A	C	.	PASS	.
ERCC-00085	844	.	A	C	.	PASS	.
ERCC-00086	940	.	A	C	.	PASS	.
ERCC-00086	941	.	A	C	.	PASS	.
ERCC-00086	942	.	A	C	.	PASS	.
ERCC-00086	943	.	A	C	.	PASS	.
ERCC-00086	944	.	A	C	.	PASS	.
ERCC-00086	945	.	A	C	.	PASS	.
ERCC-00086	946	.	A	C	.	PASS	.
ERCC-00086	947	.	A	C	.	PASS	.
ERCC-00086	948	.	A	C	.	PASS	.
ERCC-00086	949	.	A	C	.	PASS	.
ERCC-00086	950	.	A	C	.	PASS	.
ERCC-00086	951	.	A	C	.	PASS	.
ERCC-00086	952	.	A	C	.	PASS	.
ERCC-00086	953	.	A	C	.	PASS	.
ERCC-00086	954	.	A	C	.	PASS	.
ERCC-00086	955	.	A	C	.	PASS	.
ERCC-00086	956	.	A	C	.	PASS	.
ERCC-00086	957	.	A	C	.	PASS	.
ERCC-00086	958	.	A	C	.	PASS	.
ERCC-00086	959	.	A	C	.	PASS	.
ERCC-00086	960	.	A	C	.	PASS	.
ERCC-00086	961	.	A	C	.	PASS	.
ERCC-00086	962	.	A	C	.	PASS	.
ERCC-00086	963	.	A	C	.	PASS	.
ERCC-00086	964	.	A	C	.	PASS	.
ERCC-00086	965	.	A	C	.	PASS	.
ERCC-00086	966	.	A	C	.	PASS	.
ERCC-00086	967	.	A	C	.	PASS	.
ERCC-00086	968	.	A	C	.	PASS	.
ERCC-00086	969	.	A	C	.	PASS	.
ERCC-00086	970	.	A	C	.	PASS	.
ERCC-00086	971	.	A	C	.	PASS	.
ERCC-00086	972	.	A	C	.	PASS	.
ERCC-00086	973	.	A	C	.	PASS	.
ERCC-00086	974	.	A	C	.	PASS	.
ERCC-00086	975	.	A	C	.	PASS	.
ERCC-00086	976	.	A	C	.	PASS	.
ERCC-00086	977	.	A	C	.	PASS	.
ERCC-00086	978	.	A	C	.	PASS	.
ERCC-00086	979	.	A	C	.	PASS	.
ERCC-00086	980	.	A	C	.	PASS	.
ERCC-00086	981	.	A	C	.	PASS	.
ERCC-00086	982	.	A	C	.	PASS	.
ERCC-00086	983	.	A	C	.	PASS	.
ERCC-00086	984	.	A	C	.	PASS	.
ERCC-00086	985	.	A	C	.	PASS	.
ERCC-00086	986	.	A	C	.	PASS	.
ERCC-00086	987	.	A	C	.	PASS	.
ERCC-00086	988	.	A	C	.	PASS	.
ERCC-00086	989	.	A	C	.	PASS	.
ERCC-00086	990	.	A	C	.	PASS	.
ERCC-00086	999	.	A	C	.	PASS	.
ERCC-00086	1000	.	A	C	.	PASS	.
ERCC-00086	1001	.	A	C	.	PASS	.
ERCC-00086	1002	.	A	C	.	PASS	.
ERCC-00086	1003	.	A	C	.	PASS	.
ERCC-00086	1004	.	A	C	.	PASS	.
ERCC-00086	1005	.	A	C	.	PASS	.
ERCC-00086	1006	.	A	C	.	PASS	.
ERCC-00086	1007	.	A	C	.	PASS	.
ERCC-00086	1008	.	A	C	.	PASS	.
ERCC-00086	1009	.	A	C	.	PASS	.
ERCC-00086	1010	.	A	C	.	PASS	.
ERCC-00086	1011	.	A	C	.	PASS	.
ERCC-00086	1012	.	A	C	.	PASS	.
ERCC-00086	1013	.	A	C	.	PASS	.
ERCC-00086	1014	.	A	C	.	PASS	.
ERCC-00086	1015	.	A	C	.	PASS	.
ERCC-00086	1016	.	A	C	.	PASS	.
ERCC-00086	1017	.	A	C	.	PASS	.
ERCC-00086	1018	.	A	C	.	PASS	.
ERCC-00086	1019	.	A	C	.	PASS	.
ERCC-00086	1020	.	A	C	.	PASS	.
ERCC-00092	1044	.	A	C	.	PASS	.
ERCC-00092	1045	.	A	C	.	PASS	.
ERCC-00092	1046	.	A	C	.	PASS	.
ERCC-00092	1047	.	A	C	.	PASS	.
ERCC-00092	1048	.	A	C	.	PASS	.
ERCC-00092	1049	.	A	C	.	PASS	.
ERCC-00092	1050	.	A	C	.	PASS	.
ERCC-00092	1051	.	A	C	.	PASS	.
ERCC-00092	1052	.	A	C	.	PASS	.
ERCC-00092	1053	.	A	C	.	PASS	.
ERCC-00092	1054	.	A	C	.	PASS	.
ERCC-00092	1055	.	A	C	.	PASS	.
ERCC-00092	1056	.	A	C	.	PASS	.
ERCC-00092	1057	.	A	C	.	PASS	.
ERCC-00092	1058	.	A	C	.	PASS	.
ERCC-00092	1059	.	A	C	.	PASS	.
ERCC-00092	1060	.	A	C	.	PASS	.
ERCC-00092	1061	.	A	C	.	PASS	.
ERCC-00092	1062	.	A	C	.	PASS	.
ERCC-00092	1063	.	A	C	.	PASS	.
ERCC-00092	1064	.	A	C	.	PASS	.
ERCC-00092	1065	.	A	C	.	PASS	.
ERCC-00092	1066	.	A	C	.	PASS	.
ERCC-00092	1067	.	A	C	.	PASS	.
ERCC-00092	1068	.	A	C	.	PASS	.
ERCC-00092	1069	.	A	C	.	PASS	.
ERCC-00092	1070	.	A	C	.	PASS	.
ERCC-00092	1071	.	A	C	.	PASS	.
ERCC-00092	1072	.	A	C	.	PASS	.
ERCC-00092	1073	.	A	C	.	PASS	.
ERCC-00092	1074	.	A	C	.	PASS	.
ERCC-00092	1075	.	A	C	.	PASS	.
ERCC-00092	1076	.	A	C	.	PASS	.
ERCC-00092	1077	.	A	C	.	PASS	.
ERCC-00092	1078	.	A	C	.	PASS	.
ERCC-00092	1079	.	A	C	.	PASS	.
ERCC-00092	1080	.	A	C	.	PASS	.
ERCC-00092	1081	.	A	C	.	PASS	.
ERCC-00092	1082	.	A	C	.	PASS	.
ERCC-00092	1083	.	A	C	.	PASS	.
ERCC-00092	1084	.	A	C	.	PASS	.
ERCC-00092	1085	.	A	C	.	PASS	.
ERCC-00092	1086	.	A	C	.	PASS	.
ERCC-00092	1087	.	A	C	.	PASS	.
ERCC-00092	1088	.	A	C	.	PASS	.
ERCC-00092	1089	.	A	C	.	PASS	.
ERCC-00092	1090	.	A	C	.	PASS	.
ERCC-00092	1091	.	A	C	.	PASS	.
ERCC-00092	1092	.	A	C	.	PASS	.
ERCC-00092	1093	.	A	C	.	PASS	.
ERCC-00092	1094	.	A	C	.	PASS	.
ERCC-00092	1101	.	A	C	.	PASS	.
ERCC-00092	1102	.	A	C	.	PASS	.
ERCC-00092	1103	.	A	C	.	PASS	.
ERCC-00092	1104	.	A	C	.	PASS	.
ERCC-00092	1105	.	A	C	.	PASS	.
ERCC-00092	1106	.	A	C	.	PASS	.
ERCC-00092	1107	.	A	C	.	PASS	.
ERCC-00092	1108	.	A	C	.	PASS	.
ERCC-00092	1109	.	A	C	.	PASS	.
ERCC-00092	1110	.	A	C	.	PASS	.
ERCC-00092	1111	.	A	C	.	PASS	.
ERCC-00092	1112	.	A	C	.	PASS	.
ERCC-00092	1113	.	A	C	.	PASS	.
ERCC-00092	1114	.	A	C	.	PASS	.
ERCC-00092	1115	.	A	C	.	PASS	.
ERCC-00092	1116	.	A	C	.	PASS	.
ERCC-00092	1117	.	A	C	.	PASS	.
ERCC-00092	1118	.	A	C	.	PASS	.
ERCC-00092	1119	.	A	C	.	PASS	.
ERCC-00092	1120	.	A	C	.	PASS	.
ERCC-00092	1121	.	A	C	.	PASS	.
ERCC-00092	1122	.	A	C	.	PASS	.
ERCC-00092	1123	.	A	C	.	PASS	.
ERCC-00092	1124	.	A	C	.	PASS	.
ERCC-00095	445	.	A	C	.	PASS	.
ERCC-00095	446	.	A	C	.	PASS	.
ERCC-00095	447	.	A	C	.	PASS	.
ERCC-00095	448	.	A	C	.	PASS	.
ERCC-00095	449	.	A	C	.	PASS	.
ERCC-00095	450	.	A	C	.	PASS	.
ERCC-00095	451	.	A	C	.	PASS	.
ERCC-00095	452	.	A	C	.	PASS	.
ERCC-00095	453	.	A	C	.	PASS	.
ERCC-00095	454	.	A	C	.	PASS	.
ERCC-00095	455	.	A	C	.	PASS	.
ERCC-00095	456	.	A	C	.	PASS	.
ERCC-00095	457	.	A	C	.	PASS	.
ERCC-00095	458	.	A	C	.	PASS	.
ERCC-00095	459	.	A	C	.	PASS	.
ERCC-00095	460	.	A	C	.	PASS	.
ERCC-00095	461	.	A	C	.	PASS	.
ERCC-00095	462	.	A	C	.	PASS	.
ERCC-00095	463	.	A	C	.	PASS	.
ERCC-00095	464	.	A	C	.	PASS	.
ERCC-00095	465	.	A	C	.	PASS	.
ERCC-00095	466	.	A	C	.	PASS	.
ERCC-00095	467	.	A	C	.	PASS	.
ERCC-00095	468	.	A	C	.	PASS	.
ERCC-00095	469	.	A	C	.	PASS	.
ERCC-00095	470	.	A	C	.	PASS	.
ERCC-00095	471	.	A	C	.	PASS	.
ERCC-00095	472	.	A	C	.	PASS	.
ERCC-00095	473	.	A	C	.	PASS	.
ERCC-00095	474	.	A	C	.	PASS	.
ERCC-00095	475	.	A	C	.	PASS	.
ERCC-00095	476	.	A	C	.	PASS	.
ERCC-00095	477	.	A	C	.	PASS	.
ERCC-00095	478	.	A	C	.	PASS	.
ERCC-00095	479	.	A	C	.	PASS	.
ERCC-00095	480	.	A	C	.	PASS	.
ERCC-00095	481	.	A	C	.	PASS	.
ERCC-00095	482	.	A	C	.	PASS	.
ERCC-00095	483	.	A	C	.	PASS	.
ERCC-00095	484	.	A	C	.	PASS	.
ERCC-00095	485	.	A	C	.	PASS	.
ERCC-00095	486	.	A	C	.	PASS	.
ERCC-00095	487	.	A	C	.	PASS	.
ERCC-00095	488	.	A	C	.	PASS	.
ERCC-00095	489	.	A	C	.	PASS	.
ERCC-00095	490	.	A	C	.	PASS	.
ERCC-00095	491	.	A	C	.	PASS	.
ERCC-00095	492	.	A	C	.	PASS	.
ERCC-00095	493	.	A	C	.	PASS	.
ERCC-00095	494	.	A	C	.	PASS	.
ERCC-00095	495	.	A	C	.	PASS	.
ERCC-00095	500	.	A	C	.	PASS	.
ERCC-00095	501	.	A	C	.	PASS	.
ERCC-00095	502	.	A	C	.	PASS	.
ERCC-00095	503	.	A	C	.	PASS	.
ERCC-00095	504	.	A	C	.	PASS	.
ERCC-00095	505	.	A	C	.	PASS	.
ERCC-00095	506	.	A	C	.	PASS	.
ERCC-00095	507	.	A	C	.	PASS	.
ERCC-00095	508	.	A	C	.	PASS	.
ERCC-00095	509	.	A	C	.	PASS	.
ERCC-00095	510	.	A	C	.	PASS	.
ERCC-00095	511	.	A	C	.	PASS	.
ERCC-00095	512	.	A	C	.	PASS	.
ERCC-00095	513	.	A	C	.	PASS	.
ERCC-00095	514	.	A	C	.	PASS	.
ERCC-00095	515	.	A	C	.	PASS	.
ERCC-00095	516	.	A	C	.	PASS	.
ERCC-00095	517	.	A	C	.	PASS	.
ERCC-00095	518	.	A	C	.	PASS	.
ERCC-00095	519	.	A	C	.	PASS	.
ERCC-00095	520	.	A	C	.	PASS	.
ERCC-00095	521	.	A	C	.	PASS	.
ERCC-00096	832	.	A	C	.	PASS	.
ERCC-00096	1026	.	A	C	.	PASS	.
ERCC-00096	1027	.	A	C	.	PASS	.
ERCC-00096	1028	.	A	C	.	PASS	.
ERCC-00096	1029	.	A	C	.	PASS	.
ERCC-00096	1030	.	A	C	.	PASS	.
ERCC-00096	1031	.	A	C	.	PASS	.
ERCC-00096	1032	.	A	C	.	PASS	.
ERCC-00096	1033	.	A	C	.	PASS	.
ERCC-00096	1034	.	A	C	.	PASS	.
ERCC-00096	1035	.	A	C	.	PASS	.
ERCC-00096	1036	.	A	C	.	PASS	.
ERCC-00096	1037	.	A	C	.	PASS	.
ERCC-00096	1038	.	A	C	.	PASS	.
ERCC-00096	1039	.	A	C	.	PASS	.
ERCC-00096	1040	.	A	C	.	PASS	.
ERCC-00096	1041	.	A	C	.	PASS	.
ERCC-00096	1042	.	A	C	.	PASS	.
ERCC-00096	1043	.	A	C	.	PASS	.
ERCC-00096	1044	.	A	C	.	PASS	.
ERCC-00096	1045	.	A	C	.	PASS	.
ERCC-00096	1046	.	A	C	.	PASS	.
ERCC-00096	1047	.	A	C	.	PASS	.
ERCC-00096	1048	.	A	C	.	PASS	.
ERCC-00096	1049	.	A	C	.	PASS	.
ERCC-00096	1050	.	A	C	.	PASS	.
ERCC-00096	1051	.	A	C	.	PASS	.
ERCC-00096	1052	.	A	C	.	PASS	.
ERCC-00096	1053	.	A	C	.	PASS	.
ERCC-00096	1054	.	A	C	.	PASS	.
ERCC-00096	1055	.	A	C	.	PASS	.
ERCC-00096	1056	.	A	C	.	PASS	.
ERCC-00096	1057	.	A	C	.	PASS	.
ERCC-00096	1058	.	A	C	.	PASS	.
ERCC-00096	1059	.	A	C	.	PASS	.
ERCC-00096	1060	.	A	C	.	PASS	.
ERCC-00096	1061	.	A	C	.	PASS	.
ERCC-00096	1062	.	A	C	.	PASS	.
ERCC-00096	1063	.	A	C	.	PASS	.
ERCC-00096	1064	.	A	C	.	PASS	.
ERCC-00096	1065	.	A	C	.	PASS	.
ERCC-00096	1066	.	A	C	.	PASS	.
ERCC-00096	1067	.	A	C	.	PASS	.
ERCC-00096	1068	.	A	C	.	PASS	.
ERCC-00096	1069	.	A	C	.	PASS	.
ERCC-00096	1070	.	A	C	.	PASS	.
ERCC-00096	1071	.	A	C	.	PASS	.
ERCC-00096	1072	.	A	C	.	PASS	.
ERCC-00096	1073	.	A	C	.	PASS	.
ERCC-00096	1074	.	A	C	.	PASS	.
ERCC-00096	1075	.	A	C	.	PASS	.
ERCC-00096	1076	.	A	C	.	PASS	.
ERCC-00096	1084	.	A	C	.	PASS	.
ERCC-00096	1085	.	A	C	.	PASS	.
ERCC-00096	1086	.	A	C	.	PASS	.
ERCC-00096	1087	.	A	C	.	PASS	.
ERCC-00096	1088	.	A	C	.	PASS	.
ERCC-00096	1089	.	A	C	.	PASS	.
ERCC-00096	1090	.	A	C	.	PASS	.
ERCC-00096	1091	.	A	C	.	PASS	.
ERCC-00096	1092	.	A	C	.	PASS	.
ERCC-00096	1093	.	A	C	.	PASS	.
ERCC-00096	1094	.	A	C	.	PASS	.
ERCC-00096	1095	.	A	C	.	PASS	.
ERCC-00096	1096	.	A	C	.	PASS	.
ERCC-00096	1097	.	A	C	.	PASS	.
ERCC-00096	1098	.	A	C	.	PASS	.
ERCC-00096	1099	.	A	C	.	PASS	.
ERCC-00096	1100	.	A	C	.	PASS	.
ERCC-00096	1101	.	A	C	.	PASS	.
ERCC-00096	1102	.	A	C	.	PASS	.
ERCC-00096	1103	.	A	C	.	PASS	.
ERCC-00096	1104	.	A	C	.	PASS	.
ERCC-00096	1105	.	A	C	.	PASS	.
ERCC-00096	1106	.	A	C	.	PASS	.
ERCC-00096	1107	.	A	C	.	PASS	.
ERCC-00097	235	.	A	C	.	PASS	.
ERCC-00097	239	.	A	C	.	PASS	.
ERCC-00097	439	.	A	C	.	PASS	.
ERCC-00097	440	.	A	C	.	PASS	.
ERCC-00097	441	.	A	C	.	PASS	.
ERCC-00097	442	.	A	C	.	PASS	.
ERCC-00097	443	.	A	C	.	PASS	.
ERCC-00097	444	.	A	C	.	PASS	.
ERCC-00097	445	.	A	C	.	PASS	.
ERCC-00097	446	.	A	C	.	PASS	.
ERCC-00097	447	.	A	C	.	PASS	.
ERCC-00097	448	.	A	C	.	PASS	.
ERCC-00097	449	.	A	C	.	PASS	.
ERCC-00097	450	.	A	C	.	PASS	.
ERCC-00097	451	.	A	C	.	PASS	.
ERCC-00097	452	.	A	C	.	PASS	.
ERCC-00097	453	.	A	C	.	PASS	.
ERCC-00097	454	.	A	C	.	PASS	.
ERCC-00097	455	.	A	C	.	PASS	.
ERCC-00097	456	.	A	C	.	PASS	.
ERCC-00097	457	.	A	C	.	PASS	.
ERCC-00097	458	.	A	C	.	PASS	.
ERCC-00097	459	.	A	C	.	PASS	.
ERCC-00097	460	.	A	C	.	PASS	.
ERCC-00097	461	.	A	C	.	PASS	.
ERCC-00097	462	.	A	C	.	PASS	.
ERCC-00097	463	.	A	C	.	PASS	.
ERCC-00097	464	.	A	C	.	PASS	.
ERCC-00097	465	.	A	C	.	PASS	.
ERCC-00097	466	.	A	C	.	PASS	.
ERCC-00097	467	.	A	C	.	PASS	.
ERCC-00097	468	.	A	C	.	PASS	.
ERCC-00097	469	.	A	C	.	PASS	.
ERCC-00097	470	.	A	C	.	PASS	.
ERCC-00097	471	.	A	C	.	PASS	.
ERCC-00097	472	.	A	C	.	PASS	.
ERCC-00097	473	.	A	C	.	PASS	.
ERCC-00097	474	.	A	C	.	PASS	.
ERCC-00097	475	.	A	C	.	PASS	.
ERCC-00097	476	.	A	C	.	PASS	.
ERCC-00097	477	.	A	C	.	PASS	.
ERCC-00097	478	.	A	C	.	PASS	.
ERCC-00097	479	.	A	C	.	PASS	.
ERCC-00097	480	.	A	C	.	PASS	.
ERCC-00097	481	.	A	C	.	PASS	.
ERCC-00097	482	.	A	C	.	PASS	.
ERCC-00097	483	.	A	C	.	PASS	.
ERCC-00097	484	.	A	C	.	PASS	.
ERCC-00097	485	.	A	C	.	PASS	.
ERCC-00097	486	.	A	C	.	PASS	.
ERCC-00097	487	.	A	C	.	PASS	.
ERCC-00097	488	.	A	C	.	PASS	.
ERCC-00097	489	.	A	C	.	PASS	.
ERCC-00097	499	.	A	C	.	PASS	.
ERCC-00097	500	.	A	C	.	PASS	.
ERCC-00097	501	.	A	C	.	PASS	.
ERCC-00097	502	.	A	C	.	PASS	.
ERCC-00097	503	.	A	C	.	PASS	.
ERCC-00097	504	.	A	C	.	PASS	.
ERCC-00097	505	.	A	C	.	PASS	.
ERCC-00097	506	.	A	C	.	PASS	.
ERCC-00097	507	.	A	C	.	PASS	.
ERCC-00097	508	.	A	C	.	PASS	.
ERCC-00097	509	.	A	C	.	PASS	.
ERCC-00097	510	.	A	C	.	PASS	.
ERCC-00097	511	.	A	C	.	PASS	.
ERCC-00097	512	.	A	C	.	PASS	.
ERCC-00097	513	.	A	C	.	PASS	.
ERCC-00097	514	.	A	C	.	PASS	.
ERCC-00097	515	.	A	C	.	PASS	.
ERCC-00097	516	.	A	C	.	PASS	.
ERCC-00097	517	.	A	C	.	PASS	.
ERCC-00097	518	.	A	C	.	PASS	.
ERCC-00097	519	.	A	C	.	PASS	.
ERCC-00097	520	.	A	C	.	PASS	.
ERCC-00097	521	.	A	C	.	PASS	.
ERCC-00097	522	.	A	C	.	PASS	.
ERCC-00097	523	.	A	C	.	PASS	.
ERCC-00098	1061	.	A	C	.	PASS	.
ERCC-00098	1062	.	A	C	.	PASS	.
ERCC-00098	1063	.	A	C	.	PASS	.
ERCC-00098	1064	.	A	C	.	PASS	.
ERCC-00098	1065	.	A	C	.	PASS	.
ERCC-00098	1066	.	A	C	.	PASS	.
ERCC-00098	1067	.	A	C	.	PASS	.
ERCC-00098	1068	.	A	C	.	PASS	.
ERCC-00098	1069	.	A	C	.	PASS	.
ERCC-00098	1070	.	A	C	.	PASS	.
ERCC-00098	1071	.	A	C	.	PASS	.
ERCC-00098	1072	.	A	C	.	PASS	.
ERCC-00098	1073	.	A	C	.	PASS	.
ERCC-00098	1074	.	A	C	.	PASS	.
ERCC-00098	1075	.	A	C	.	PASS	.
ERCC-00098	1076	.	A	C	.	PASS	.
ERCC-00098	1077	.	A	C	.	PASS	.
ERCC-00098	1078	.	A	C	.	PASS	.
ERCC-00098	1079	.	A	C	.	PASS	.
ERCC-00098	1080	.	A	C	.	PASS	.
ERCC-00098	1081	.	A	C	.	PASS	.
ERCC-00098	1082	.	A	C	.	PASS	.
ERCC-00098	1083	.	A	C	.	PASS	.
ERCC-00098	1084	.	A	C	.	PASS	.
ERCC-00098	1085	.	A	C	.	PASS	.
ERCC-00098	1086	.	A	C	.	PASS	.
ERCC-00098	1087	.	A	C	.	PASS	.
ERCC-00098	1088	.	A	C	.	PASS	.
ERCC-00098	1089	.	A	C	.	PASS	.
ERCC-00098	1090	.	A	C	.	PASS	.
ERCC-00098	1091	.	A	C	.	PASS	.
ERCC-00098	1092	.	A	C	.	PASS	.
ERCC-00098	1093	.	A	C	.	PASS	.
ERCC-00098	1094	.	A	C	.	PASS	.
ERCC-00098	1095	.	A	C	.	PASS	.
ERCC-00098	1096	.	A	C	.	PASS	.
ERCC-00098	1097	.	A	C	.	PASS	.
ERCC-00098	1098	.	A	C	.	PASS	.
ERCC-00098	1099	.	A	C	.	PASS	.
ERCC-00098	1100	.	A	C	.	PASS	.
ERCC-00098	1101	.	A	C	.	PASS	.
ERCC-00098	1102	.	A	C	.	PASS	.
ERCC-00098	1103	.	A	C	.	PASS	.
ERCC-00098	1104	.	A	C	.	PASS	.
ERCC-00098	1105	.	A	C	.	PASS	.
ERCC-00098	1106	.	A	C	.	PASS	.
ERCC-00098	1107	.	A	C	.	PASS	.
ERCC-00098	1108	.	A	C	.	PASS	.
ERCC-00098	1109	.	A	C	.	PASS	.
ERCC-00098	1110	.	A	C	.	PASS	.
ERCC-00098	1111	.	A	C	.	PASS	.
ERCC-00098	1119	.	A	C	.	PASS	.
ERCC-00098	1120	.	A	C	.	PASS	.
ERCC-00098	1121	.	A	C	.	PASS	.
ERCC-00098	1122	.	A	C	.	PASS	.
ERCC-00098	1123	.	A	C	.	PASS	.
ERCC-00098	1124	.	A	C	.	PASS	.
ERCC-00098	1125	.	A	C	.	PASS	.
ERCC-00098	1126	.	A	C	.	PASS	.
ERCC-00098	1127	.	A	C	.	PASS	.
ERCC-00098	1128	.	A	C	.	PASS	.
ERCC-00098	1129	.	A	C	.	PASS	.
ERCC-00098	1130	.	A	C	.	PASS	.
ERCC-00098	1131	.	A	C	.	PASS	.
ERCC-00098	1132	.	A	C	.	PASS	.
ERCC-00098	1133	.	A	C	.	PASS	.
ERCC-00098	1134	.	A	C	.	PASS	.
ERCC-00098	1135	.	A	C	.	PASS	.
ERCC-00098	1136	.	A	C	.	PASS	.
ERCC-00098	1137	.	A	C	.	PASS	.
ERCC-00098	1138	.	A	C	.	PASS	.
ERCC-00098	1139	.	A	C	.	PASS	.
ERCC-00098	1140	.	A	C	.	PASS	.
ERCC-00098	1141	.	A	C	.	PASS	.
ERCC-00098	1142	.	A	C	.	PASS	.
ERCC-00098	1143	.	A	C	.	PASS	.
ERCC-00099	1264	.	A	C	.	PASS	.
ERCC-00099	1265	.	A	C	.	PASS	.
ERCC-00099	1266	.	A	C	.	PASS	.
ERCC-00099	1267	.	A	C	.	PASS	.
ERCC-00099	1268	.	A	C	.	PASS	.
ERCC-00099	1269	.	A	C	.	PASS	.
ERCC-00099	1270	.	A	C	.	PASS	.
ERCC-00099	1271	.	A	C	.	PASS	.
ERCC-00099	1272	.	A	C	.	PASS	.
ERCC-00099	1273	.	A	C	.	PASS	.
ERCC-00099	1274	.	A	C	.	PASS	.
ERCC-00099	1275	.	A	C	.	PASS	.
ERCC-00099	1276	.	A	C	.	PASS	.
ERCC-00099	1277	.	A	C	.	PASS	.
ERCC-00099	1278	.	A	C	.	PASS	.
ERCC-00099	1279	.	A	C	.	PASS	.
ERCC-00099	1280	.	A	C	.	PASS	.
ERCC-00099	1281	.	A	C	.	PASS	.
ERCC-00099	1282	.	A	C	.	PASS	.
ERCC-00099	1283	.	A	C	.	PASS	.
ERCC-00099	1284	.	A	C	.	PASS	.
ERCC-00099	1285	.	A	C	.	PASS	.
ERCC-00099	1286	.	A	C	.	PASS	.
ERCC-00099	1287	.	A	C	.	PASS	.
ERCC-00099	1288	.	A	C	.	PASS	.
ERCC-00099	1289	.	A	C	.	PASS	.
ERCC-00099	1290	.	A	C	.	PASS	.
ERCC-00099	1291	.	A	C	.	PASS	.
ERCC-00099	1292	.	A	C	.	PASS	.
ERCC-00099	1293	.	A	C	.	PASS	.
ERCC-00099	1294	.	A	C	.	PASS	.
ERCC-00099	1295	.	A	C	.	PASS	.
ERCC-00099	1296	.	A	C	.	PASS	.
ERCC-00099	1297	.	A	C	.	PASS	.
ERCC-00099	1298	.	A	C	.	PASS	.
ERCC-00099	1299	.	A	C	.	PASS	.
ERCC-00099	1300	.	A	C	.	PASS	.
ERCC-00099	1301	.	A	C	.	PASS	.
ERCC-00099	1302	.	A	C	.	PASS	.
ERCC-00099	1303	.	A	C	.	PASS	.
ERCC-00099	1304	.	A	C	.	PASS	.
ERCC-00099	1305	.	A	C	.	PASS	.
ERCC-00099	1306	.	A	C	.	PASS	.
ERCC-00099	1307	.	A	C	.	PASS	.
ERCC-00099	1308	.	A	C	.	PASS	.
ERCC-00099	1309	.	A	C	.	PASS	.
ERCC-00099	1310	.	A	C	.	PASS	.
ERCC-00099	1311	.	A	C	.	PASS	.
ERCC-00099	1312	.	A	C	.	PASS	.
ERCC-00099	1313	.	A	C	.	PASS	.
ERCC-00099	1314	.	A	C	.	PASS	.
ERCC-00099	1325	.	A	C	.	PASS	.
ERCC-00099	1326	.	A	C	.	PASS	.
ERCC-00099	1327	.	A	C	.	PASS	.
ERCC-00099	1328	.	A	C	.	PASS	.
ERCC-00099	1329	.	A	C	.	PASS	.
ERCC-00099	1330	.	A	C	.	PASS	.
ERCC-00099	1331	.	A	C	.	PASS	.
ERCC-00099	1332	.	A	C	.	PASS	.
ERCC-00099	1333	.	A	C	.	PASS	.
ERCC-00099	1334	.	A	C	.	PASS	.
ERCC-00099	1335	.	A	C	.	PASS	.
ERCC-00099	1336	.	A	C	.	PASS	.
ERCC-00099	1337	.	A	C	.	PASS	.
ERCC-00099	1338	.	A	C	.	PASS	.
ERCC-00099	1339	.	A	C	.	PASS	.
ERCC-00099	1340	.	A	C	.	PASS	.
ERCC-00099	1341	.	A	C	.	PASS	.
ERCC-00099	1342	.	A	C	.	PASS	.
ERCC-00099	1343	.	A	C	.	PASS	.
ERCC-00099	1344	.	A	C	.	PASS	.
ERCC-00099	1345	.	A	C	.	PASS	.
ERCC-00099	1346	.	A	C	.	PASS	.
ERCC-00099	1347	.	A	C	.	PASS	.
ERCC-00099	1348	.	A	C	.	PASS	.
ERCC-00099	1349	.	A	C	.	PASS	.
ERCC-00099	1350	.	A	C	.	PASS	.
ERCC-00104	1930	.	A	C	.	PASS	.
ERCC-00104	1931	.	A	C	.	PASS	.
ERCC-00104	1932	.	A	C	.	PASS	.
ERCC-00104	1933	.	A	C	.	PASS	.
ERCC-00104	1934	.	A	C	.	PASS	.
ERCC-00104	1935	.	A	C	.	PASS	.
ERCC-00104	1936	.	A	C	.	PASS	.
ERCC-00104	1937	.	A	C	.	PASS	.
ERCC-00104	1938	.	A	C	.	PASS	.
ERCC-00104	1939	.	A	C	.	PASS	.
ERCC-00104	1940	.	A	C	.	PASS	.
ERCC-00104	1941	.	A	C	.	PASS	.
ERCC-00104	1942	.	A	C	.	PASS	.
ERCC-00104	1943	.	A	C	.	PASS	.
ERCC-00104	1944	.	A	C	.	PASS	.
ERCC-00104	1945	.	A	C	.	PASS	.
ERCC-00104	1946	.	A	C	.	PASS	.
ERCC-00104	1947	.	A	C	.	PASS	.
ERCC-00104	1948	.	A	C	.	PASS	.
ERCC-00104	1949	.	A	C	.	PASS	.
ERCC-00104	1950	.	A	C	.	PASS	.
ERCC-00104	1951	.	A	C	.	PASS	.
ERCC-00104	1952	.	A	C	.	PASS	.
ERCC-00104	1953	.	A	C	.	PASS	.
ERCC-00104	1954	.	A	C	.	PASS	.
ERCC-00104	1955	.	A	C	.	PASS	.
ERCC-00104	1956	.	A	C	.	PASS	.
ERCC-00104	1957	.	A	C	.	PASS	.
ERCC-00104	1958	.	A	C	.	PASS	.
ERCC-00104	1959	.	A	C	.	PASS	.
ERCC-00104	1960	.	A	C	.	PASS	.
ERCC-00104	1961	.	A	C	.	PASS	.
ERCC-00104	1962	.	A	C	.	PASS	.
ERCC-00104	1963	.	A	C	.	PASS	.
ERCC-00104	1964	.	A	C	.	PASS	.
ERCC-00104	1965	.	A	C	.	PASS	.
ERCC-00104	1966	.	A	C	.	PASS	.
ERCC-00104	1967	.	A	C	.	PASS	.
ERCC-00104	1968	.	A	C	.	PASS	.
ERCC-00104	1969	.	A	C	.	PASS	.
ERCC-00104	1970	.	A	C	.	PASS	.
ERCC-00104	1971	.	A	C	.	PASS	.
ERCC-00104	1972	.	A	C	.	PASS	.
ERCC-00104	1973	.	A	C	.	PASS	.
ERCC-00104	1974	.	A	C	.	PASS	.
ERCC-00104	1975	.	A	C	.	PASS	.
ERCC-00104	1976	.	A	C	.	PASS	.
ERCC-00104	1977	.	A	C	.	PASS	.
ERCC-00104	1978	.	A	C	.	PASS	.
ERCC-00104	1979	.	A	C	.	PASS	.
ERCC-00104	1980	.	A	C	.	PASS	.
ERCC-00104	2000	.	A	C	.	PASS	.
ERCC-00104	2001	.	A	C	.	PASS	.
ERCC-00104	2002	.	A	C	.	PASS	.
ERCC-00104	2003	.	A	C	.	PASS	.
ERCC-00104	2004	.	A	C	.	PASS	.
ERCC-00104	2005	.	A	C	.	PASS	.
ERCC-00104	2006	.	A	C	.	PASS	.
ERCC-00104	2007	.	A	C	.	PASS	.
ERCC-00104	2008	.	A	C	.	PASS	.
ERCC-00104	2009	.	A	C	.	PASS	.
ERCC-00104	2010	.	A	C	.	PASS	.
ERCC-00104	2011	.	A	C	.	PASS	.
ERCC-00104	2012	.	A	C	.	PASS	.
ERCC-00104	2013	.	A	C	.	PASS	.
ERCC-00104	2014	.	A	C	.	PASS	.
ERCC-00104	2015	.	A	C	.	PASS	.
ERCC-00104	2016	.	A	C	.	PASS	.
ERCC-00104	2017	.	A	C	.	PASS	.
ERCC-00104	2018	.	A	C	.	PASS	.
ERCC-00104	2019	.	A	C	.	PASS	.
ERCC-00104	2020	.	A	C	.	PASS	.
ERCC-00104	2021	.	A	C	.	PASS	.
ERCC-00104	2022	.	A	C	.	PASS	.
ERCC-00108	947	.	A	C	.	PASS	.
ERCC-00108	948	.	A	C	.	PASS	.
ERCC-00108	949	.	A	C	.	PASS	.
ERCC-00108	950	.	A	C	.	PASS	.
ERCC-00108	951	.	A	C	.	PASS	.
ERCC-00108	952	.	A	C	.	PASS	.
ERCC-00108	953	.	A	C	.	PASS	.
ERCC-00108	954	.	A	C	.	PASS	.
ERCC-00108	955	.	A	C	.	PASS	.
ERCC-00108	956	.	A	C	.	PASS	.
ERCC-00108	957	.	A	C	.	PASS	.
ERCC-00108	958	.	A	C	.	PASS	.
ERCC-00108	959	.	A	C	.	PASS	.
ERCC-00108	960	.	A	C	.	PASS	.
ERCC-00108	961	.	A	C	.	PASS	.
ERCC-00108	962	.	A	C	.	PASS	.
ERCC-00108	963	.	A	C	.	PASS	.
ERCC-00108	964	.	A	C	.	PASS	.
ERCC-00108	965	.	A	C	.	PASS	.
ERCC-00108	966	.	A	C	.	PASS	.
ERCC-00108	967	.	A	C	.	PASS	.
ERCC-00108	968	.	A	C	.	PASS	.
ERCC-00108	969	.	A	C	.	PASS	.
ERCC-00108	970	.	A	C	.	PASS	.
ERCC-00108	971	.	A	C	.	PASS	.
ERCC-00108	972	.	A	C	.	PASS	.
ERCC-00108	973	.	A	C	.	PASS	.
ERCC-00108	974	.	A	C	.	PASS	.
ERCC-00108	975	.	A	C	.	PASS	.
ERCC-00108	976	.	A	C	.	PASS	.
ERCC-00108	977	.	A	C	.	PASS	.
ERCC-00108	978	.	A	C	.	PASS	.
ERCC-00108	979	.	A	C	.	PASS	.
ERCC-00108	980	.	A	C	.	PASS	.
ERCC-00108	981	.	A	C	.	PASS	.
ERCC-00108	982	.	A	C	.	PASS	.
ERCC-00108	983	.	A	C	.	PASS	.
ERCC-00108	984	.	A	C	.	PASS	.
ERCC-00108	985	.	A	C	.	PASS	.
ERCC-00108	986	.	A	C	.	PASS	.
ERCC-00108	987	.	A	C	.	PASS	.
ERCC-00108	988	.	A	C	.	PASS	.
ERCC-00108	989	.	A	C	.	PASS	.
ERCC-00108	990	.	A	C	.	PASS	.
ERCC-00108	991	.	A	C	.	PASS	.
ERCC-00108	992	.	A	C	.	PASS	.
ERCC-00108	993	.	A	C	.	PASS	.
ERCC-00108	994	.	A	C	.	PASS	.
ERCC-00108	995	.	A	C	.	PASS	.
ERCC-00108	996	.	A	C	.	PASS	.
ERCC-00108	997	.	A	C	.	PASS	.
ERCC-00108	998	.	A	C	.	PASS	.
ERCC-00108	999	.	A	C	.	PASS	.
ERCC-00108	1000	.	A	C	.	PASS	.
ERCC-00108	1001	.	A	C	.	PASS	.
ERCC-00108	1002	.	A	C	.	PASS	.
ERCC-00108	1003	.	A	C	.	PASS	.
ERCC-00108	1004	.	A	C	.	PASS	.
ERCC-00108	1005	.	A	C	.	PASS	.
ERCC-00108	1006	.	A	C	.	PASS	.
ERCC-00108	1007	.	A	C	.	PASS	.
ERCC-00108	1008	.	A	C	.	PASS	.
ERCC-00108	1009	.	A	C	.	PASS	.
ERCC-00108	1010	.	A	C	.	PASS	.
ERCC-00108	1011	.	A	C	.	PASS	.
ERCC-00108	1012	.	A	C	.	PASS	.
ERCC-00108	1013	.	A	C	.	PASS	.
ERCC-00108	1014	.	A	C	.	PASS	.
ERCC-00108	1015	.	A	C	.	PASS	.
ERCC-00108	1016	.	A	C	.	PASS	.
ERCC-00108	1017	.	A	C	.	PASS	.
ERCC-00108	1018	.	A	C	.	PASS	.
ERCC-00108	1019	.	A	C	.	PASS	.
ERCC-00108	1020	.	A	C	.	PASS	.
ERCC-00108	1021	.	A	C	.	PASS	.
ERCC-00108	1022	.	A	C	.	PASS	.
ERCC-00109	456	.	A	C	.	PASS	.
ERCC-00109	457	.	A	C	.	PASS	.
ERCC-00109	458	.	A	C	.	PASS	.
ERCC-00109	459	.	A	C	.	PASS	.
ERCC-00109	460	.	A	C	.	PASS	.
ERCC-00109	461	.	A	C	.	PASS	.
ERCC-00109	462	.	A	C	.	PASS	.
ERCC-00109	463	.	A	C	.	PASS	.
ERCC-00109	464	.	A	C	.	PASS	.
ERCC-00109	465	.	A	C	.	PASS	.
ERCC-00109	466	.	A	C	.	PASS	.
ERCC-00109	467	.	A	C	.	PASS	.
ERCC-00109	468	.	A	C	.	PASS	.
ERCC-00109	469	.	A	C	.	PASS	.
ERCC-00109	470	.	A	C	.	PASS	.
ERCC-00109	471	.	A	C	.	PASS	.
ERCC-00109	472	.	A	C	.	PASS	.
ERCC-00109	473	.	A	C	.	PASS	.
ERCC-00109	474	.	A	C	.	PASS	.
ERCC-00109	475	.	A	C	.	PASS	.
ERCC-00109	476	.	A	C	.	PASS	.
ERCC-00109	477	.	A	C	.	PASS	.
ERCC-00109	478	.	A	C	.	PASS	.
ERCC-00109	479	.	A	C	.	PASS	.
ERCC-00109	480	.	A	C	.	PASS	.
ERCC-00109	481	.	A	C	.	PASS	.
ERCC-00109	482	.	A	C	.	PASS	.
ERCC-00109	483	.	A	C	.	PASS	.
ERCC-00109	484	.	A	C	.	PASS	.
ERCC-00109	485	.	A	C	.	PASS	.
ERCC-00109	486	.	A	C	.	PASS	.
ERCC-00109	487	.	A	C	.	PASS	.
ERCC-00109	488	.	A	C	.	PASS	.
ERCC-00109	489	.	A	C	.	PASS	.
ERCC-00109	490	.	A	C	.	PASS	.
ERCC-00109	491	.	A	C	.	PASS	.
ERCC-00109	492	.	A	C	.	PASS	.
ERCC-00109	493	.	A	C	.	PASS	.
ERCC-00109	494	.	A	C	.	PASS	.
ERCC-00109	495	.	A	C	.	PASS	.
ERCC-00109	496	.	A	C	.	PASS	.
ERCC-00109	497	.	A	C	.	PASS	.
ERCC-00109	498	.	A	C	.	PASS	.
ERCC-00109	499	.	A	C	.	PASS	.
ERCC-00109	500	.	A	C	.	PASS	.
ERCC-00109	501	.	A	C	.	PASS	.
ERCC-00109	502	.	A	C	.	PASS	.
ERCC-00109	503	.	A	C	.	PASS	.
ERCC-00109	504	.	A	C	.	PASS	.
ERCC-00109	505	.	A	C	.	PASS	.
ERCC-00109	506	.	A	C	.	PASS	.
ERCC-00109	513	.	A	C	.	PASS	.
ERCC-00109	514	.	A	C	.	PASS	.
ERCC-00109	515	.	A	C	.	PASS	.
ERCC-00109	516	.	A	C	.	PASS	.
ERCC-00109	517	.	A	C	.	PASS	.
ERCC-00109	518	.	A	C	.	PASS	.
ERCC-00109	519	.	A	C	.	PASS	.
ERCC-00109	520	.	A	C	.	PASS	.
ERCC-00109	521	.	A	C	.	PASS	.
ERCC-00109	522	.	A	C	.	PASS	.
ERCC-00109	523	.	A	C	.	PASS	.
ERCC-00109	524	.	A	C	.	PASS	.
ERCC-00109	525	.	A	C	.	PASS	.
ERCC-00109	526	.	A	C	.	PASS	.
ERCC-00109	527	.	A	C	.	PASS	.
ERCC-00109	528	.	A	C	.	PASS	.
ERCC-00109	529	.	A	C	.	PASS	.
ERCC-00109	530	.	A	C	.	PASS	.
ERCC-00109	531	.	A	C	.	PASS	.
ERCC-00109	532	.	A	C	.	PASS	.
ERCC-00109	533	.	A	C	.	PASS	.
ERCC-00109	534	.	A	C	.	PASS	.
ERCC-00109	535	.	A	C	.	PASS	.
ERCC-00109	536	.	A	C	.	PASS	.
ERCC-00111	916	.	A	C	.	PASS	.
ERCC-00111	917	.	A	C	.	PASS	.
ERCC-00111	918	.	A	C	.	PASS	.
ERCC-00111	919	.	A	C	.	PASS	.
ERCC-00111	920	.	A	C	.	PASS	.
ERCC-00111	921	.	A	C	.	PASS	.
ERCC-00111	922	.	A	C	.	PASS	.
ERCC-00111	923	.	A	C	.	PASS	.
ERCC-00111	924	.	A	C	.	PASS	.
ERCC-00111	925	.	A	C	.	PASS	.
ERCC-00111	926	.	A	C	.	PASS	.
ERCC-00111	927	.	A	C	.	PASS	.
ERCC-00111	928	.	A	C	.	PASS	.
ERCC-00111	929	.	A	C	.	PASS	.
ERCC-00111	930	.	A	C	.	PASS	.
ERCC-00111	931	.	A	C	.	PASS	.
ERCC-00111	932	.	A	C	.	PASS	.
ERCC-00111	933	.	A	C	.	PASS	.
ERCC-00111	934	.	A	C	.	PASS	.
ERCC-00111	935	.	A	C	.	PASS	.
ERCC-00111	936	.	A	C	.	PASS	.
ERCC-00111	937	.	A	C	.	PASS	.
ERCC-00111	938	.	A	C	.	PASS	.
ERCC-00111	939	.	A	C	.	PASS	.
ERCC-00111	940	.	A	C	.	PASS	.
ERCC-00111	941	.	A	C	.	PASS	.
ERCC-00111	942	.	A	C	.	PASS	.
ERCC-00111	943	.	A	C	.	PASS	.
ERCC-00111	944	.	A	C	.	PASS	.
ERCC-00111	945	.	A	C	.	PASS	.
ERCC-00111	946	.	A	C	.	PASS	.
ERCC-00111	947	.	A	C	.	PASS	.
ERCC-00111	948	.	A	C	.	PASS	.
ERCC-00111	949	.	A	C	.	PASS	.
ERCC-00111	950	.	A	C	.	PASS	.
ERCC-00111	951	.	A	C	.	PASS	.
ERCC-00111	952	.	A	C	.	PASS	.
ERCC-00111	953	.	A	C	.	PASS	.
ERCC-00111	954	.	A	C	.	PASS	.
ERCC-00111	955	.	A	C	.	PASS	.
ERCC-00111	956	.	A	C	.	PASS	.
ERCC-00111	957	.	A	C	.	PASS	.
ERCC-00111	958	.	A	C	.	PASS	.
ERCC-00111	959	.	A	C	.	PASS	.
ERCC-00111	960	.	A	C	.	PASS	.
ERCC-00111	961	.	A	C	.	PASS	.
ERCC-00111	962	.	A	C	.	PASS	.
ERCC-00111	963	.	A	C	.	PASS	.
ERCC-00111	964	.	A	C	.	PASS	.
ERCC-00111	965	.	A	C	.	PASS	.
ERCC-00111	966	.	A	C	.	PASS	.
ERCC-00111	971	.	A	C	.	PASS	.
ERCC-00111	972	.	A	C	.	PASS	.
ERCC-00111	973	.	A	C	.	PASS	.
ERCC-00111	974	.	A	C	.	PASS	.
ERCC-00111	975	.	A	C	.	PASS	.
ERCC-00111	976	.	A	C	.	PASS	.
ERCC-00111	977	.	A	C	.	PASS	.
ERCC-00111	978	.	A	C	.	PASS	.
ERCC-00111	979	.	A	C	.	PASS	.
ERCC-00111	980	.	A	C	.	PASS	.
ERCC-00111	981	.	A	C	.	PASS	.
ERCC-00111	982	.	A	C	.	PASS	.
ERCC-00111	983	.	A	C	.	PASS	.
ERCC-00111	984	.	A	C	.	PASS	.
ERCC-00111	985	.	A	C	.	PASS	.
ERCC-00111	986	.	A	C	.	PASS	.
ERCC-00111	987	.	A	C	.	PASS	.
ERCC-00111	988	.	A	C	.	PASS	.
ERCC-00111	989	.	A	C	.	PASS	.
ERCC-00111	990	.	A	C	.	PASS	.
ERCC-00111	991	.	A	C	.	PASS	.
ERCC-00111	992	.	A	C	.	PASS	.
ERCC-00111	993	.	A	C	.	PASS	.
ERCC-00111	994	.	A	C	.	PASS	.
ERCC-00112	1057	.	A	C	.	PASS	.
ERCC-00112	1058	.	A	C	.	PASS	.
ERCC-00112	1059	.	A	C	.	PASS	.
ERCC-00112	1060	.	A	C	.	PASS	.
ERCC-00112	1061	.	A	C	.	PASS	.
ERCC-00112	1062	.	A	C	.	PASS	.
ERCC-00112	1063	.	A	C	.	PASS	.
ERCC-00112	1064	.	A	C	.	PASS	.
ERCC-00112	1065	.	A	C	.	PASS	.
ERCC-00112	1066	.	A	C	.	PASS	.
ERCC-00112	1067	.	A	C	.	PASS	.
ERCC-00112	1068	.	A	C	.	PASS	.
ERCC-00112	1069	.	A	C	.	PASS	.
ERCC-00112	1070	.	A	C	.	PASS	.
ERCC-00112	1071	.	A	C	.	PASS	.
ERCC-00112	1072	.	A	C	.	PASS	.
ERCC-00112	1073	.	A	C	.	PASS	.
ERCC-00112	1074	.	A	C	.	PASS	.
ERCC-00112	1075	.	A	C	.	PASS	.
ERCC-00112	1076	.	A	C	.	PASS	.
ERCC-00112	1077	.	A	C	.	PASS	.
ERCC-00112	1078	.	A	C	.	PASS	.
ERCC-00112	1079	.	A	C	.	PASS	.
ERCC-00112	1080	.	A	C	.	PASS	.
ERCC-00112	1081	.	A	C	.	PASS	.
ERCC-00112	1082	.	A	C	.	PASS	.
ERCC-00112	1083	.	A	C	.	PASS	.
ERCC-00112	1084	.	A	C	.	PASS	.
ERCC-00112	1085	.	A	C	.	PASS	.
ERCC-00112	1086	.	A	C	.	PASS	.
ERCC-00112	1087	.	A	C	.	PASS	.
ERCC-00112	1088	.	A	C	.	PASS	.
ERCC-00112	1089	.	A	C	.	PASS	.
ERCC-00112	1090	.	A	C	.	PASS	.
ERCC-00112	1091	.	A	C	.	PASS	.
ERCC-00112	1092	.	A	C	.	PASS	.
ERCC-00112	1093	.	A	C	.	PASS	.
ERCC-00112	1094	.	A	C	.	PASS	.
ERCC-00112	1095	.	A	C	.	PASS	.
ERCC-00112	1096	.	A	C	.	PASS	.
ERCC-00112	1097	.	A	C	.	PASS	.
ERCC-00112	1098	.	A	C	.	PASS	.
ERCC-00112	1099	.	A	C	.	PASS	.
ERCC-00112	1100	.	A	C	.	PASS	.
ERCC-00112	1101	.	A	C	.	PASS	.
ERCC-00112	1102	.	A	C	.	PASS	.
ERCC-00112	1103	.	A	C	.	PASS	.
ERCC-00112	1104	.	A	C	.	PASS	.
ERCC-00112	1105	.	A	C	.	PASS	.
ERCC-00112	1106	.	A	C	.	PASS	.
ERCC-00112	1107	.	A	C	.	PASS	.
ERCC-00112	1113	.	A	C	.	PASS	.
ERCC-00112	1114	.	A	C	.	PASS	.
ERCC-00112	1115	.	A	C	.	PASS	.
ERCC-00112	1116	.	A	C	.	PASS	.
ERCC-00112	1117	.	A	C	.	PASS	.
ERCC-00112	1118	.	A	C	.	PASS	.
ERCC-00112	1119	.	A	C	.	PASS	.
ERCC-00112	1120	.	A	C	.	PASS	.
ERCC-00112	1121	.	A	C	.	PASS	.
ERCC-00112	1122	.	A	C	.	PASS	.
ERCC-00112	1123	.	A	C	.	PASS	.
ERCC-00112	1124	.	A	C	.	PASS	.
ERCC-00112	1125	.	A	C	.	PASS	.
ERCC-00112	1126	.	A	C	.	PASS	.
ERCC-00112	1127	.	A	C	.	PASS	.
ERCC-00112	1128	.	A	C	.	PASS	.
ERCC-00112	1129	.	A	C	.	PASS	.
ERCC-00112	1130	.	A	C	.	PASS	.
ERCC-00112	1131	.	A	C	.	PASS	.
ERCC-00112	1132	.	A	C	.	PASS	.
ERCC-00112	1133	.	A	C	.	PASS	.
ERCC-00112	1134	.	A	C	.	PASS	.
ERCC-00112	1135	.	A	C	.	PASS	.
ERCC-00112	1136	.	A	C	.	PASS	.
ERCC-00113	760	.	A	C	.	PASS	.
ERCC-00113	761	.	A	C	.	PASS	.
ERCC-00113	762	.	A	C	.	PASS	.
ERCC-00113	763	.	A	C	.	PASS	.
ERCC-00113	764	.	A	C	.	PASS	.
ERCC-00113	765	.	A	C	.	PASS	.
ERCC-00113	766	.	A	C	.	PASS	.
ERCC-00113	767	.	A	C	.	PASS	.
ERCC-00113	768	.	A	C	.	PASS	.
ERCC-00113	769	.	A	C	.	PASS	.
ERCC-00113	770	.	A	C	.	PASS	.
ERCC-00113	771	.	A	C	.	PASS	.
ERCC-00113	772	.	A	C	.	PASS	.
ERCC-00113	773	.	A	C	.	PASS	.
ERCC-00113	774	.	A	C	.	PASS	.
ERCC-00113	775	.	A	C	.	PASS	.
ERCC-00113	776	.	A	C	.	PASS	.
ERCC-00113	777	.	A	C	.	PASS	.
ERCC-00113	778	.	A	C	.	PASS	.
ERCC-00113	779	.	A	C	.	PASS	.
ERCC-00113	780	.	A	C	.	PASS	.
ERCC-00113	781	.	A	C	.	PASS	.
ERCC-00113	782	.	A	C	.	PASS	.
ERCC-00113	783	.	A	C	.	PASS	.
ERCC-00113	784	.	A	C	.	PASS	.
ERCC-00113	785	.	A	C	.	PASS	.
ERCC-00113	786	.	A	C	.	PASS	.
ERCC-00113	787	.	A	C	.	PASS	.
ERCC-00113	788	.	A	C	.	PASS	.
ERCC-00113	789	.	A	C	.	PASS	.
ERCC-00113	790	.	A	C	.	PASS	.
ERCC-00113	791	.	A	C	.	PASS	.
ERCC-00113	792	.	A	C	.	PASS	.
ERCC-00113	793	.	A	C	.	PASS	.
ERCC-00113	794	.	A	C	.	PASS	.
ERCC-00113	795	.	A	C	.	PASS	.
ERCC-00113	796	.	A	C	.	PASS	.
ERCC-00113	797	.	A	C	.	PASS	.
ERCC-00113	798	.	A	C	.	PASS	.
ERCC-00113	799	.	A	C	.	PASS	.
ERCC-00113	800	.	A	C	.	PASS	.
ERCC-00113	801	.	A	C	.	PASS	.
ERCC-00113	802	.	A	C	.	PASS	.
ERCC-00113	803	.	A	C	.	PASS	.
ERCC-00113	804	.	A	C	.	PASS	.
ERCC-00113	805	.	A	C	.	PASS	.
ERCC-00113	806	.	A	C	.	PASS	.
ERCC-00113	807	.	A	C	.	PASS	.
ERCC-00113	808	.	A	C	.	PASS	.
ERCC-00113	809	.	A	C	.	PASS	.
ERCC-00113	810	.	A	C	.	PASS	.
ERCC-00113	818	.	A	C	.	PASS	.
ERCC-00113	819	.	A	C	.	PASS	.
ERCC-00113	820	.	A	C	.	PASS	.
ERCC-00113	821	.	A	C	.	PASS	.
ERCC-00113	822	.	A	C	.	PASS	.
ERCC-00113	823	.	A	C	.	PASS	.
ERCC-00113	824	.	A	C	.	PASS	.
ERCC-00113	825	.	A	C	.	PASS	.
ERCC-00113	826	.	A	C	.	PASS	.
ERCC-00113	827	.	A	C	.	PASS	.
ERCC-00113	828	.	A	C	.	PASS	.
ERCC-00113	829	.	A	C	.	PASS	.
ERCC-00113	830	.	A	C	.	PASS	.
ERCC-00113	831	.	A	C	.	PASS	.
ERCC-00113	832	.	A	C	.	PASS	.
ERCC-00113	833	.	A	C	.	PASS	.
ERCC-00113	834	.	A	C	.	PASS	.
ERCC-00113	835	.	A	C	.	PASS	.
ERCC-00113	836	.	A	C	.	PASS	.
ERCC-00113	837	.	A	C	.	PASS	.
ERCC-00113	838	.	A	C	.	PASS	.
ERCC-00113	839	.	A	C	.	PASS	.
ERCC-00113	840	.	A	C	.	PASS	.
ERCC-00116	1	.	A	C	.	PASS	.
ERCC-00116	1905	.	A	C	.	PASS	.
ERCC-00116	1906	.	A	C	.	PASS	.
ERCC-00116	1907	.	A	C	.	PASS	.
ERCC-00116	1908	.	A	C	.	PASS	.
ERCC-00116	1909	.	A	C	.	PASS	.
ERCC-00116	1910	.	A	C	.	PASS	.
ERCC-00116	1911	.	A	C	.	PASS	.
ERCC-00116	1912	.	A	C	.	PASS	.
ERCC-00116	1913	.	A	C	.	PASS	.
ERCC-00116	1914	.	A	C	.	PASS	.
ERCC-00116	1915	.	A	C	.	PASS	.
ERCC-00116	1916	.	A	C	.	PASS	.
ERCC-00116	1917	.	A	C	.	PASS	.
ERCC-00116	1918	.	A	C	.	PASS	.
ERCC-00116	1919	.	A	C	.	PASS	.
ERCC-00116	1920	.	A	C	.	PASS	.
ERCC-00116	1921	.	A	C	.	PASS	.
ERCC-00116	1922	.	A	C	.	PASS	.
ERCC-00116	1923	.	A	C	.	PASS	.
ERCC-00116	1924	.	A	C	.	PASS	.
ERCC-00116	1925	.	A	C	.	PASS	.
ERCC-00116	1926	.	A	C	.	PASS	.
ERCC-00116	1927	.	A	C	.	PASS	.
ERCC-00116	1928	.	A	C	.	PASS	.
ERCC-00116	1929	.	A	C	.	PASS	.
ERCC-00116	1930	.	A	C	.	PASS	.
ERCC-00116	1931	.	A	C	.	PASS	.
ERCC-00116	1932	.	A	C	.	PASS	.
ERCC-00116	1933	.	A	C	.	PASS	.
ERCC-00116	1934	.	A	C	.	PASS	.
ERCC-00116	1935	.	A	C	.	PASS	.
ERCC-00116	1936	.	A	C	.	PASS	.
ERCC-00116	1937	.	A	C	.	PASS	.
ERCC-00116	1938	.	A	C	.	PASS	.
ERCC-00116	1939	.	A	C	.	PASS	.
ERCC-00116	1940	.	A	C	.	PASS	.
ERCC-00116	1941	.	A	C	.	PASS	.
ERCC-00116	1942	.	A	C	.	PASS	.
ERCC-00116	1943	.	A	C	.	PASS	.
ERCC-00116	1944	.	A	C	.	PASS	.
ERCC-00116	1945	.	A	C	.	PASS	.
ERCC-00116	1946	.	A	C	.	PASS	.
ERCC-00116	1947	.	A	C	.	PASS	.
ERCC-00116	1948	.	A	C	.	PASS	.
ERCC-00116	1949	.	A	C	.	PASS	.
ERCC-00116	1950	.	A	C	.	PASS	.
ERCC-00116	1951	.	A	C	.	PASS	.
ERCC-00116	1952	.	A	C	.	PASS	.
ERCC-00116	1953	.	A	C	.	PASS	.
ERCC-00116	1954	.	A	C	.	PASS	.
ERCC-00116	1955	.	A	C	.	PASS	.
ERCC-00116	1970	.	A	C	.	PASS	.
ERCC-00116	1971	.	A	C	.	PASS	.
ERCC-00116	1972	.	A	C	.	PASS	.
ERCC-00116	1973	.	A	C	.	PASS	.
ERCC-00116	1974	.	A	C	.	PASS	.
ERCC-00116	1975	.	A	C	.	PASS	.
ERCC-00116	1976	.	A	C	.	PASS	.
ERCC-00116	1977	.	A	C	.	PASS	.
ERCC-00116	1978	.	A	C	.	PASS	.
ERCC-00116	1979	.	A	C	.	PASS	.
ERCC-00116	1980	.	A	C	.	PASS	.
ERCC-00116	1981	.	A	C	.	PASS	.
ERCC-00116	1982	.	A	C	.	PASS	.
ERCC-00116	1983	.	A	C	.	PASS	.
ERCC-00116	1984	.	A	C	.	PASS	.
ERCC-00116	1985	.	A	C	.	PASS	.
ERCC-00116	1986	.	A	C	.	PASS	.
ERCC-00116	1987	.	A	C	.	PASS	.
ERCC-00116	1988	.	A	C	.	PASS	.
ERCC-00116	1989	.	A	C	.	PASS	.
ERCC-00116	1990	.	A	C	.	PASS	.
ERCC-00116	1991	.	A	C	.	PASS	.
ERCC-00117	1057	.	A	C	.	PASS	.
ERCC-00117	1058	.	A	C	.	PASS	.
ERCC-00117	1059	.	A	C	.	PASS	.
ERCC-00117	1060	.	A	C	.	PASS	.
ERCC-00117	1061	.	A	C	.	PASS	.
ERCC-00117	1062	.	A	C	.	PASS	.
ERCC-00117	1063	.	A	C	.	PASS	.
ERCC-00117	1064	.	A	C	.	PASS	.
ERCC-00117	1065	.	A	C	.	PASS	.
ERCC-00117	1066	.	A	C	.	PASS	.
ERCC-00117	1067	.	A	C	.	PASS	.
ERCC-00117	1068	.	A	C	.	PASS	.
ERCC-00117	1069	.	A	C	.	PASS	.
ERCC-00117	1070	.	A	C	.	PASS	.
ERCC-00117	1071	.	A	C	.	PASS	.
ERCC-00117	1072	.	A	C	.	PASS	.
ERCC-00117	1073	.	A	C	.	PASS	.
ERCC-00117	1074	.	A	C	.	PASS	.
ERCC-00117	1075	.	A	C	.	PASS	.
ERCC-00117	1076	.	A	C	.	PASS	.
ERCC-00117	1077	.	A	C	.	PASS	.
ERCC-00117	1078	.	A	C	.	PASS	.
ERCC-00117	1079	.	A	C	.	PASS	.
ERCC-00117	1080	.	A	C	.	PASS	.
ERCC-00117	1081	.	A	C	.	PASS	.
ERCC-00117	1082	.	A	C	.	PASS	.
ERCC-00117	1083	.	A	C	.	PASS	.
ERCC-00117	1084	.	A	C	.	PASS	.
ERCC-00117	1085	.	A	C	.	PASS	.
ERCC-00117	1086	.	A	C	.	PASS	.
ERCC-00117	1087	.	A	C	.	PASS	.
ERCC-00117	1088	.	A	C	.	PASS	.
ERCC-00117	1089	.	A	C	.	PASS	.
ERCC-00117	1090	.	A	C	.	PASS	.
ERCC-00117	1091	.	A	C	.	PASS	.
ERCC-00117	1092	.	A	C	.	PASS	.
ERCC-00117	1093	.	A	C	.	PASS	.
ERCC-00117	1094	.	A	C	.	PASS	.
ERCC-00117	1095	.	A	C	.	PASS	.
ERCC-00117	1096	.	A	C	.	PASS	.
ERCC-00117	1097	.	A	C	.	PASS	.
ERCC-00117	1098	.	A	C	.	PASS	.
ERCC-00117	1099	.	A	C	.	PASS	.
ERCC-00117	1100	.	A	C	.	PASS	.
ERCC-00117	1101	.	A	C	.	PASS	.
ERCC-00117	1102	.	A	C	.	PASS	.
ERCC-00117	1103	.	A	C	.	PASS	.
ERCC-00117	1104	.	A	C	.	PASS	.
ERCC-00117	1105	.	A	C	.	PASS	.
ERCC-00117	1106	.	A	C	.	PASS	.
ERCC-00117	1107	.	A	C	.	PASS	.
ERCC-00117	1113	.	A	C	.	PASS	.
ERCC-00117	1114	.	A	C	.	PASS	.
ERCC-00117	1115	.	A	C	.	PASS	.
ERCC-00117	1116	.	A	C	.	PASS	.
ERCC-00117	1117	.	A	C	.	PASS	.
ERCC-00117	1118	.	A	C	.	PASS	.
ERCC-00117	1119	.	A	C	.	PASS	.
ERCC-00117	1120	.	A	C	.	PASS	.
ERCC-00117	1121	.	A	C	.	PASS	.
ERCC-00117	1122	.	A	C	.	PASS	.
ERCC-00117	1123	.	A	C	.	PASS	.
ERCC-00117	1124	.	A	C	.	PASS	.
ERCC-00117	1125	.	A	C	.	PASS	.
ERCC-00117	1126	.	A	C	.	PASS	.
ERCC-00117	1127	.	A	C	.	PASS	.
ERCC-00117	1128	.	A	C	.	PASS	.
ERCC-00117	1129	.	A	C	.	PASS	.
ERCC-00117	1130	.	A	C	.	PASS	.
ERCC-00117	1131	.	A	C	.	PASS	.
ERCC-00117	1132	.	A	C	.	PASS	.
ERCC-00117	1133	.	A	C	.	PASS	.
ERCC-00117	1134	.	A	C	.	PASS	.
ERCC-00117	1135	.	A	C	.	PASS	.
ERCC-00117	1136	.	A	C	.	PASS	.
ERCC-00120	460	.	A	C	.	PASS	.
ERCC-00120	461	.	A	C	.	PASS	.
ERCC-00120	462	.	A	C	.	PASS	.
ERCC-00120	463	.	A	C	.	PASS	.
ERCC-00120	464	.	A	C	.	PASS	.
ERCC-00120	465	.	A	C	.	PASS	.
ERCC-00120	466	.	A	C	.	PASS	.
ERCC-00120	467	.	A	C	.	PASS	.
ERCC-00120	468	.	A	C	.	PASS	.
ERCC-00120	469	.	A	C	.	PASS	.
ERCC-00120	470	.	A	C	.	PASS	.
ERCC-00120	471	.	A	C	.	PASS	.
ERCC-00120	472	.	A	C	.	PASS	.
ERCC-00120	473	.	A	C	.	PASS	.
ERCC-00120	474	.	A	C	.	PASS	.
ERCC-00120	475	.	A	C	.	PASS	.
ERCC-00120	476	.	A	C	.	PASS	.
ERCC-00120	477	.	A	C	.	PASS	.
ERCC-00120	478	.	A	C	.	PASS	.
ERCC-00120	479	.	A	C	.	PASS	.
ERCC-00120	480	.	A	C	.	PASS	.
ERCC-00120	481	.	A	C	.	PASS	.
ERCC-00120	482	.	A	C	.	PASS	.
ERCC-00120	483	.	A	C	.	PASS	.
ERCC-00120	484	.	A	C	.	PASS	.
ERCC-00120	485	.	A	C	.	PASS	.
ERCC-00120	486	.	A	C	.	PASS	.
ERCC-00120	487	.	A	C	.	PASS	.
ERCC-00120	488	.	A	C	.	PASS	.
ERCC-00120	489	.	A	C	.	PASS	.
ERCC-00120	490	.	A	C	.	PASS	.
ERCC-00120	491	.	A	C	.	PASS	.
ERCC-00120	492	.	A	C	.	PASS	.
ERCC-00120	493	.	A	C	.	PASS	.
ERCC-00120	494	.	A	C	.	PASS	.
ERCC-00120	495	.	A	C	.	PASS	.
ERCC-00120	496	.	A	C	.	PASS	.
ERCC-00120	497	.	A	C	.	PASS	.
ERCC-00120	498	.	A	C	.	PASS	.
ERCC-00120	499	.	A	C	.	PASS	.
ERCC-00120	500	.	A	C	.	PASS	.
ERCC-00120	501	.	A	C	.	PASS	.
ERCC-00120	502	.	A	C	.	PASS	.
ERCC-00120	503	.	A	C	.	PASS	.
ERCC-00120	504	.	A	C	.	PASS	.
ERCC-00120	505	.	A	C	.	PASS	.
ERCC-00120	506	.	A	C	.	PASS	.
ERCC-00120	507	.	A	C	.	PASS	.
ERCC-00120	508	.	A	C	.	PASS	.
ERCC-00120	509	.	A	C	.	PASS	.
ERCC-00120	510	.	A	C	.	PASS	.
ERCC-00120	513	.	A	C	.	PASS	.
ERCC-00120	514	.	A	C	.	PASS	.
ERCC-00120	515	.	A	C	.	PASS	.
ERCC-00120	516	.	A	C	.	PASS	.
ERCC-00120	517	.	A	C	.	PASS	.
ERCC-00120	518	.	A	C	.	PASS	.
ERCC-00120	519	.	A	C	.	PASS	.
ERCC-00120	520	.	A	C	.	PASS	.
ERCC-00120	521	.	A	C	.	PASS	.
ERCC-00120	522	.	A	C	.	PASS	.
ERCC-00120	523	.	A	C	.	PASS	.
ERCC-00120	524	.	A	C	.	PASS	.
ERCC-00120	525	.	A	C	.	PASS	.
ERCC-00120	526	.	A	C	.	PASS	.
ERCC-00120	527	.	A	C	.	PASS	.
ERCC-00120	528	.	A	C	.	PASS	.
ERCC-00120	529	.	A	C	.	PASS	.
ERCC-00120	530	.	A	C	.	PASS	.
ERCC-00120	531	.	A	C	.	PASS	.
ERCC-00120	532	.	A	C	.	PASS	.
ERCC-00120	533	.	A	C	.	PASS	.
ERCC-00120	534	.	A	C	.	PASS	.
ERCC-00120	535	.	A	C	.	PASS	.
ERCC-00120	536	.	A	C	.	PASS	.
ERCC-00123	944	.	A	C	.	PASS	.
ERCC-00123	945	.	A	C	.	PASS	.
ERCC-00123	946	.	A	C	.	PASS	.
ERCC-00123	947	.	A	C	.	PASS	.
ERCC-00123	948	.	A	C	.	PASS	.
ERCC-00123	949	.	A	C	.	PASS	.
ERCC-00123	950	.	A	C	.	PASS	.
ERCC-00123	951	.	A	C	.	PASS	.
ERCC-00123	952	.	A	C	.	PASS	.
ERCC-00123	953	.	A	C	.	PASS	.
ERCC-00123	954	.	A	C	.	PASS	.
ERCC-00123	955	.	A	C	.	PASS	.
ERCC-00123	956	.	A	C	.	PASS	.
ERCC-00123	957	.	A	C	.	PASS	.
ERCC-00123	958	.	A	C	.	PASS	.
ERCC-00123	959	.	A	C	.	PASS	.
ERCC-00123	960	.	A	C	.	PASS	.
ERCC-00123	961	.	A	C	.	PASS	.
ERCC-00123	962	.	A	C	.	PASS	.
ERCC-00123	963	.	A	C	.	PASS	.
ERCC-00123	964	.	A	C	.	PASS	.
ERCC-00123	965	.	A	C	.	PASS	.
ERCC-00123	966	.	A	C	.	PASS	.
ERCC-00123	967	.	A	C	.	PASS	.
ERCC-00123	968	.	A	C	.	PASS	.
ERCC-00123	969	.	A	C	.	PASS	.
ERCC-00123	970	.	A	C	.	PASS	.
ERCC-00123	971	.	A	C	.	PASS	.
ERCC-00123	972	.	A	C	.	PASS	.
ERCC-00123	973	.	A	C	.	PASS	.
ERCC-00123	974	.	A	C	.	PASS	.
ERCC-00123	975	.	A	C	.	PASS	.
ERCC-00123	976	.	A	C	.	PASS	.
ERCC-00123	977	.	A	C	.	PASS	.
ERCC-00123	978	.	A	C	.	PASS	.
ERCC-00123	979	.	A	C	.	PASS	.
ERCC-00123	980	.	A	C	.	PASS	.
ERCC-00123	981	.	A	C	.	PASS	.
ERCC-00123	982	.	A	C	.	PASS	.
ERCC-00123	983	.	A	C	.	PASS	.
ERCC-00123	984	.	A	C	.	PASS	.
ERCC-00123	985	.	A	C	.	PASS	.
ERCC-00123	986	.	A	C	.	PASS	.
ERCC-00123	987	.	A	C	.	PASS	.
ERCC-00123	988	.	A	C	.	PASS	.
ERCC-00123	989	.	A	C	.	PASS	.
ERCC-00123	990	.	A	C	.	PASS	.
ERCC-00123	991	.	A	C	.	PASS	.
ERCC-00123	992	.	A	C	.	PASS	.
ERCC-00123	993	.	A	C	.	PASS	.
ERCC-00123	994	.	A	C	.	PASS	.
ERCC-00123	995	.	A	C	.	PASS	.
ERCC-00123	996	.	A	C	.	PASS	.
ERCC-00123	997	.	A	C	.	PASS	.
ERCC-00123	998	.	A	C	.	PASS	.
ERCC-00123	999	.	A	C	.	PASS	.
ERCC-00123	1000	.	A	C	.	PASS	.
ERCC-00123	1001	.	A	C	.	PASS	.
ERCC-00123	1002	.	A	C	.	PASS	.
ERCC-00123	1003	.	A	C	.	PASS	.
ERCC-00123	1004	.	A	C	.	PASS	.
ERCC-00123	1005	.	A	C	.	PASS	.
ERCC-00123	1006	.	A	C	.	PASS	.
ERCC-00123	1007	.	A	C	.	PASS	.
ERCC-00123	1008	.	A	C	.	PASS	.
ERCC-00123	1009	.	A	C	.	PASS	.
ERCC-00123	1010	.	A	C	.	PASS	.
ERCC-00123	1011	.	A	C	.	PASS	.
ERCC-00123	1012	.	A	C	.	PASS	.
ERCC-00123	1013	.	A	C	.	PASS	.
ERCC-00123	1014	.	A	C	.	PASS	.
ERCC-00123	1015	.	A	C	.	PASS	.
ERCC-00123	1016	.	A	C	.	PASS	.
ERCC-00123	1017	.	A	C	.	PASS	.
ERCC-00123	1018	.	A	C	.	PASS	.
ERCC-00123	1019	.	A	C	.	PASS	.
ERCC-00123	1020	.	A	C	.	PASS	.
ERCC-00123	1021	.	A	C	.	PASS	.
ERCC-00123	1022	.	A	C	.	PASS	.
ERCC-00126	1042	.	A	C	.	PASS	.
ERCC-00126	1043	.	A	C	.	PASS	.
ERCC-00126	1044	.	A	C	.	PASS	.
ERCC-00126	1045	.	A	C	.	PASS	.
ERCC-00126	1046	.	A	C	.	PASS	.
ERCC-00126	1047	.	A	C	.	PASS	.
ERCC-00126	1048	.	A	C	.	PASS	.
ERCC-00126	1049	.	A	C	.	PASS	.
ERCC-00126	1050	.	A	C	.	PASS	.
ERCC-00126	1051	.	A	C	.	PASS	.
ERCC-00126	1052	.	A	C	.	PASS	.
ERCC-00126	1053	.	A	C	.	PASS	.
ERCC-00126	1054	.	A	C	.	PASS	.
ERCC-00126	1055	.	A	C	.	PASS	.
ERCC-00126	1056	.	A	C	.	PASS	.
ERCC-00126	1057	.	A	C	.	PASS	.
ERCC-00126	1058	.	A	C	.	PASS	.
ERCC-00126	1059	.	A	C	.	PASS	.
ERCC-00126	1060	.	A	C	.	PASS	.
ERCC-00126	1061	.	A	C	.	PASS	.
ERCC-00126	1062	.	A	C	.	PASS	.
ERCC-00126	1063	.	A	C	.	PASS	.
ERCC-00126	1064	.	A	C	.	PASS	.
ERCC-00126	1065	.	A	C	.	PASS	.
ERCC-00126	1066	.	A	C	.	PASS	.
ERCC-00126	1067	.	A	C	.	PASS	.
ERCC-00126	1068	.	A	C	.	PASS	.
ERCC-00126	1069	.	A	C	.	PASS	.
ERCC-00126	1070	.	A	C	.	PASS	.
ERCC-00126	1071	.	A	C	.	PASS	.
ERCC-00126	1072	.	A	C	.	PASS	.
ERCC-00126	1073	.	A	C	.	PASS	.
ERCC-00126	1074	.	A	C	.	PASS	.
ERCC-00126	1075	.	A	C	.	PASS	.
ERCC-00126	1076	.	A	C	.	PASS	.
ERCC-00126	1077	.	A	C	.	PASS	.
ERCC-00126	1078	.	A	C	.	PASS	.
ERCC-00126	1079	.	A	C	.	PASS	.
ERCC-00126	1080	.	A	C	.	PASS	.
ERCC-00126	1081	.	A	C	.	PASS	.
ERCC-00126	1082	.	A	C	.	PASS	.
ERCC-00126	1083	.	A	C	.	PASS	.
ERCC-00126	1084	.	A	C	.	PASS	.
ERCC-00126	1085	.	A	C	.	PASS	.
ERCC-00126	1086	.	A	C	.	PASS	.
ERCC-00126	1087	.	A	C	.	PASS	.
ERCC-00126	1088	.	A	C	.	PASS	.
ERCC-00126	1089	.	A	C	.	PASS	.
ERCC-00126	1090	.	A	C	.	PASS	.
ERCC-00126	1091	.	A	C	.	PASS	.
ERCC-00126	1092	.	A	C	.	PASS	.
ERCC-00126	1098	.	A	C	.	PASS	.
ERCC-00126	1099	.	A	C	.	PASS	.
ERCC-00126	1100	.	A	C	.	PASS	.
ERCC-00126	1101	.	A	C	.	PASS	.
ERCC-00126	1102	.	A	C	.	PASS	.
ERCC-00126	1103	.	A	C	.	PASS	.
ERCC-00126	1104	.	A	C	.	PASS	.
ERCC-00126	1105	.	A	C	.	PASS	.
ERCC-00126	1106	.	A	C	.	PASS	.
ERCC-00126	1107	.	A	C	.	PASS	.
ERCC-00126	1108	.	A	C	.	PASS	.
ERCC-00126	1109	.	A	C	.	PASS	.
ERCC-00126	1110	.	A	C	.	PASS	.
ERCC-00126	1111	.	A	C	.	PASS	.
ERCC-00126	1112	.	A	C	.	PASS	.
ERCC-00126	1113	.	A	C	.	PASS	.
ERCC-00126	1114	.	A	C	.	PASS	.
ERCC-00126	1115	.	A	C	.	PASS	.
ERCC-00126	1116	.	A	C	.	PASS	.
ERCC-00126	1117	.	A	C	.	PASS	.
ERCC-00126	1118	.	A	C	.	PASS	.
ERCC-00126	1119	.	A	C	.	PASS	.
ERCC-00128	1058	.	A	C	.	PASS	.
ERCC-00128	1059	.	A	C	.	PASS	.
ERCC-00128	1060	.	A	C	.	PASS	.
ERCC-00128	1061	.	A	C	.	PASS	.
ERCC-00128	1062	.	A	C	.	PASS	.
ERCC-00128	1063	.	A	C	.	PASS	.
ERCC-00128	1064	.	A	C	.	PASS	.
ERCC-00128	1065	.	A	C	.	PASS	.
ERCC-00128	1066	.	A	C	.	PASS	.
ERCC-00128	1067	.	A	C	.	PASS	.
ERCC-00128	1068	.	A	C	.	PASS	.
ERCC-00128	1069	.	A	C	.	PASS	.
ERCC-00128	1070	.	A	C	.	PASS	.
ERCC-00128	1071	.	A	C	.	PASS	.
ERCC-00128	1072	.	A	C	.	PASS	.
ERCC-00128	1073	.	A	C	.	PASS	.
ERCC-00128	1074	.	A	C	.	PASS	.
ERCC-00128	1075	.	A	C	.	PASS	.
ERCC-00128	1076	.	A	C	.	PASS	.
ERCC-00128	1077	.	A	C	.	PASS	.
ERCC-00128	1078	.	A	C	.	PASS	.
ERCC-00128	1079	.	A	C	.	PASS	.
ERCC-00128	1080	.	A	C	.	PASS	.
ERCC-00128	1081	.	A	C	.	PASS	.
ERCC-00128	1082	.	A	C	.	PASS	.
ERCC-00128	1083	.	A	C	.	PASS	.
ERCC-00128	1084	.	A	C	.	PASS	.
ERCC-00128	1085	.	A	C	.	PASS	.
ERCC-00128	1086	.	A	C	.	PASS	.
ERCC-00128	1087	.	A	C	.	PASS	.
ERCC-00128	1088	.	A	C	.	PASS	.
ERCC-00128	1089	.	A	C	.	PASS	.
ERCC-00128	1090	.	A	C	.	PASS	.
ERCC-00128	1091	.	A	C	.	PASS	.
ERCC-00128	1092	.	A	C	.	PASS	.
ERCC-00128	1093	.	A	C	.	PASS	.
ERCC-00128	1094	.	A	C	.	PASS	.
ERCC-00128	1095	.	A	C	.	PASS	.
ERCC-00128	1096	.	A	C	.	PASS	.
ERCC-00128	1097	.	A	C	.	PASS	.
ERCC-00128	1098	.	A	C	.	PASS	.
ERCC-00128	1099	.	A	C	.	PASS	.
ERCC-00128	1100	.	A	C	.	PASS	.
ERCC-00128	1101	.	A	C	.	PASS	.
ERCC-00128	1102	.	A	C	.	PASS	.
ERCC-00128	1103	.	A	C	.	PASS	.
ERCC-00128	1104	.	A	C	.	PASS	.
ERCC-00128	1105	.	A	C	.	PASS	.
ERCC-00128	1106	.	A	C	.	PASS	.
ERCC-00128	1107	.	A	C	.	PASS	.
ERCC-00128	1108	.	A	C	.	PASS	.
ERCC-00128	1110	.	A	C	.	PASS	.
ERCC-00128	1111	.	A	C	.	PASS	.
ERCC-00128	1112	.	A	C	.	PASS	.
ERCC-00128	1113	.	A	C	.	PASS	.
ERCC-00128	1114	.	A	C	.	PASS	.
ERCC-00128	1115	.	A	C	.	PASS	.
ERCC-00128	1116	.	A	C	.	PASS	.
ERCC-00128	1117	.	A	C	.	PASS	.
ERCC-00128	1118	.	A	C	.	PASS	.
ERCC-00128	1119	.	A	C	.	PASS	.
ERCC-00128	1120	.	A	C	.	PASS	.
ERCC-00128	1121	.	A	C	.	PASS	.
ERCC-00128	1122	.	A	C	.	PASS	.
ERCC-00128	1123	.	A	C	.	PASS	.
ERCC-00128	1124	.	A	C	.	PASS	.
ERCC-00128	1125	.	A	C	.	PASS	.
ERCC-00128	1126	.	A	C	.	PASS	.
ERCC-00128	1127	.	A	C	.	PASS	.
ERCC-00128	1128	.	A	C	.	PASS	.
ERCC-00128	1129	.	A	C	.	PASS	.
ERCC-00128	1130	.	A	C	.	PASS	.
ERCC-00128	1131	.	A	C	.	PASS	.
ERCC-00128	1132	.	A	C	.	PASS	.
ERCC-00128	1133	.	A	C	.	PASS	.
ERCC-00130	980	.	A	C	.	PASS	.
ERCC-00130	981	.	A	C	.	PASS	.
ERCC-00130	982	.	A	C	.	PASS	.
ERCC-00130	983	.	A	C	.	PASS	.
ERCC-00130	984	.	A	C	.	PASS	.
ERCC-00130	985	.	A	C	.	PASS	.
ERCC-00130	986	.	A	C	.	PASS	.
ERCC-00130	987	.	A	C	.	PASS	.
ERCC-00130	988	.	A	C	.	PASS	.
ERCC-00130	989	.	A	C	.	PASS	.
ERCC-00130	990	.	A	C	.	PASS	.
ERCC-00130	991	.	A	C	.	PASS	.
ERCC-00130	992	.	A	C	.	PASS	.
ERCC-00130	993	.	A	C	.	PASS	.
ERCC-00130	994	.	A	C	.	PASS	.
ERCC-00130	995	.	A	C	.	PASS	.
ERCC-00130	996	.	A	C	.	PASS	.
ERCC-00130	997	.	A	C	.	PASS	.
ERCC-00130	998	.	A	C	.	PASS	.
ERCC-00130	999	.	A	C	.	PASS	.
ERCC-00130	1000	.	A	C	.	PASS	.
ERCC-00130	1001	.	A	C	.	PASS	.
ERCC-00130	1002	.	A	C	.	PASS	.
ERCC-00130	1003	.	A	C	.	PASS	.
ERCC-00130	1004	.	A	C	.	PASS	.
ERCC-00130	1005	.	A	C	.	PASS	.
ERCC-00130	1006	.	A	C	.	PASS	.
ERCC-00130	1007	.	A	C	.	PASS	.
ERCC-00130	1008	.	A	C	.	PASS	.
ERCC-00130	1009	.	A	C	.	PASS	.
ERCC-00130	1010	.	A	C	.	PASS	.
ERCC-00130	1011	.	A	C	.	PASS	.
ERCC-00130	1012	.	A	C	.	PASS	.
ERCC-00130	1013	.	A	C	.	PASS	.
ERCC-00130	1014	.	A	C	.	PASS	.
ERCC-00130	1015	.	A	C	.	PASS	.
ERCC-00130	1016	.	A	C	.	PASS	.
ERCC-00130	1017	.	A	C	.	PASS	.
ERCC-00130	1018	.	A	C	.	PASS	.
ERCC-00130	1019	.	A	C	.	PASS	.
ERCC-00130	1020	.	A	C	.	PASS	.
ERCC-00130	1021	.	A	C	.	PASS	.
ERCC-00130	1022	.	A	C	.	PASS	.
ERCC-00130	1023	.	A	C	.	PASS	.
ERCC-00130	1024	.	A	C	.	PASS	.
ERCC-00130	1025	.	A	C	.	PASS	.
ERCC-00130	1026	.	A	C	.	PASS	.
ERCC-00130	1027	.	A	C	.	PASS	.
ERCC-00130	1028	.	A	C	.	PASS	.
ERCC-00130	1029	.	A	C	.	PASS	.
ERCC-00130	1030	.	A	C	.	PASS	.
ERCC-00130	1038	.	A	C	.	PASS	.
ERCC-00130	1039	.	A	C	.	PASS	.
ERCC-00130	1040	.	A	C	.	PASS	.
ERCC-00130	1041	.	A	C	.	PASS	.
ERCC-00130	1042	.	A	C	.	PASS	.
ERCC-00130	1043	.	A	C	.	PASS	.
ERCC-00130	1044	.	A	C	.	PASS	.
ERCC-00130	1045	.	A	C	.	PASS	.
ERCC-00130	1046	.	A	C	.	PASS	.
ERCC-00130	1047	.	A	C	.	PASS	.
ERCC-00130	1048	.	A	C	.	PASS	.
ERCC-00130	1049	.	A	C	.	PASS	.
ERCC-00130	1050	.	A	C	.	PASS	.
ERCC-00130	1051	.	A	C	.	PASS	.
ERCC-00130	1052	.	A	C	.	PASS	.
ERCC-00130	1053	.	A	C	.	PASS	.
ERCC-00130	1054	.	A	C	.	PASS	.
ERCC-00130	1055	.	A	C	.	PASS	.
ERCC-00130	1056	.	A	C	.	PASS	.
ERCC-00130	1057	.	A	C	.	PASS	.
ERCC-00130	1058	.	A	C	.	PASS	.
ERCC-00130	1059	.	A	C	.	PASS	.
ERCC-00131	150	.	A	C	.	PASS	.
ERCC-00131	674	.	A	C	.	PASS	.
ERCC-00131	692	.	A	C	.	PASS	.
ERCC-00131	693	.	A	C	.	PASS	.
ERCC-00131	694	.	A	C	.	PASS	.
ERCC-00131	695	.	A	C	.	PASS	.
ERCC-00131	696	.	A	C	.	PASS	.
ERCC-00131	697	.	A	C	.	PASS	.
ERCC-00131	698	.	A	C	.	PASS	.
ERCC-00131	699	.	A	C	.	PASS	.
ERCC-00131	700	.	A	C	.	PASS	.
ERCC-00131	701	.	A	C	.	PASS	.
ERCC-00131	702	.	A	C	.	PASS	.
ERCC-00131	703	.	A	C	.	PASS	.
ERCC-00131	704	.	A	C	.	PASS	.
ERCC-00131	705	.	A	C	.	PASS	.
ERCC-00131	706	.	A	C	.	PASS	.
ERCC-00131	707	.	A	C	.	PASS	.
ERCC-00131	708	.	A	C	.	PASS	.
ERCC-00131	709	.	A	C	.	PASS	.
ERCC-00131	710	.	A	C	.	PASS	.
ERCC-00131	711	.	A	C	.	PASS	.
ERCC-00131	712	.	A	C	.	PASS	.
ERCC-00131	713	.	A	C	.	PASS	.
ERCC-00131	714	.	A	C	.	PASS	.
ERCC-00131	715	.	A	C	.	PASS	.
ERCC-00131	716	.	A	C	.	PASS	.
ERCC-00131	717	.	A	C	.	PASS	.
ERCC-00131	718	.	A	C	.	PASS	.
ERCC-00131	719	.	A	C	.	PASS	.
ERCC-00131	720	.	A	C	.	PASS	.
ERCC-00131	721	.	A	C	.	PASS	.
ERCC-00131	722	.	A	C	.	PASS	.
ERCC-00131	723	.	A	C	.	PASS	.
ERCC-00131	724	.	A	C	.	PASS	.
ERCC-00131	725	.	A	C	.	PASS	.
ERCC-00131	726	.	A	C	.	PASS	.
ERCC-00131	727	.	A	C	.	PASS	.
ERCC-00131	728	.	A	C	.	PASS	.
ERCC-00131	729	.	A	C	.	PASS	.
ERCC-00131	730	.	A	C	.	PASS	.
ERCC-00131	731	.	A	C	.	PASS	.
ERCC-00131	732	.	A	C	.	PASS	.
ERCC-00131	733	.	A	C	.	PASS	.
ERCC-00131	734	.	A	C	.	PASS	.
ERCC-00131	735	.	A	C	.	PASS	.
ERCC-00131	736	.	A	C	.	PASS	.
ERCC-00131	737	.	A	C	.	PASS	.
ERCC-00131	738	.	A	C	.	PASS	.
ERCC-00131	739	.	A	C	.	PASS	.
ERCC-00131	740	.	A	C	.	PASS	.
ERCC-00131	741	.	A	C	.	PASS	.
ERCC-00131	742	.	A	C	.	PASS	.
ERCC-00131	748	.	A	C	.	PASS	.
ERCC-00131	749	.	A	C	.	PASS	.
ERCC-00131	750	.	A	C	.	PASS	.
ERCC-00131	751	.	A	C	.	PASS	.
ERCC-00131	752	.	A	C	.	PASS	.
ERCC-00131	753	.	A	C	.	PASS	.
ERCC-00131	754	.	A	C	.	PASS	.
ERCC-00131	755	.	A	C	.	PASS	.
ERCC-00131	756	.	A	C	.	PASS	.
ERCC-00131	757	.	A	C	.	PASS	.
ERCC-00131	758	.	A	C	.	PASS	.
ERCC-00131	759	.	A	C	.	PASS	.
ERCC-00131	760	.	A	C	.	PASS	.
ERCC-00131	761	.	A	C	.	PASS	.
ERCC-00131	762	.	A	C	.	PASS	.
ERCC-00131	763	.	A	C	.	PASS	.
ERCC-00131	764	.	A	C	.	PASS	.
ERCC-00131	765	.	A	C	.	PASS	.
ERCC-00131	766	.	A	C	.	PASS	.
ERCC-00131	767	.	A	C	.	PASS	.
ERCC-00131	768	.	A	C	.	PASS	.
ERCC-00131	769	.	A	C	.	PASS	.
ERCC-00131	770	.	A	C	.	PASS	.
ERCC-00131	771	.	A	C	.	PASS	.
ERCC-00134	29	.	A	C	.	PASS	.
ERCC-00134	198	.	A	C	.	PASS	.
ERCC-00134	199	.	A	C	.	PASS	.
ERCC-00134	200	.	A	C	.	PASS	.
ERCC-00134	201	.	A	C	.	PASS	.
ERCC-00134	202	.	A	C	.	PASS	.
ERCC-00134	203	.	A	C	.	PASS	.
ERCC-00134	204	.	A	C	.	PASS	.
ERCC-00134	205	.	A	C	.	PASS	.
ERCC-00134	206	.	A	C	.	PASS	.
ERCC-00134	207	.	A	C	.	PASS	.
ERCC-00134	208	.	A	C	.	PASS	.
ERCC-00134	209	.	A	C	.	PASS	.
ERCC-00134	210	.	A	C	.	PASS	.
ERCC-00134	211	.	A	C	.	PASS	.
ERCC-00134	212	.	A	C	.	PASS	.
ERCC-00134	213	.	A	C	.	PASS	.
ERCC-00134	214	.	A	C	.	PASS	.
ERCC-00134	215	.	A	C	.	PASS	.
ERCC-00134	216	.	A	C	.	PASS	.
ERCC-00134	217	.	A	C	.	PASS	.
ERCC-00134	218	.	A	C	.	PASS	.
ERCC-00134	219	.	A	C	.	PASS	.
ERCC-00134	220	.	A	C	.	PASS	.
ERCC-00134	221	.	A	C	.	PASS	.
ERCC-00134	222	.	A	C	.	PASS	.
ERCC-00134	223	.	A	C	.	PASS	.
ERCC-00134	224	.	A	C	.	PASS	.
ERCC-00134	225	.	A	C	.	PASS	.
ERCC-00134	226	.	A	C	.	PASS	.
ERCC-00134	227	.	A	C	.	PASS	.
ERCC-00134	228	.	A	C	.	PASS	.
ERCC-00134	229	.	A	C	.	PASS	.
ERCC-00134	230	.	A	C	.	PASS	.
ERCC-00134	231	.	A	C	.	PASS	.
ERCC-00134	232	.	A	C	.	PASS	.
ERCC-00134	233	.	A	C	.	PASS	.
ERCC-00134	234	.	A	C	.	PASS	.
ERCC-00134	235	.	A	C	.	PASS	.
ERCC-00134	236	.	A	C	.	PASS	.
ERCC-00134	237	.	A	C	.	PASS	.
ERCC-00134	238	.	A	C	.	PASS	.
ERCC-00134	239	.	A	C	.	PASS	.
ERCC-00134	240	.	A	C	.	PASS	.
ERCC-00134	241	.	A	C	.	PASS	.
ERCC-00134	242	.	A	C	.	PASS	.
ERCC-00134	243	.	A	C	.	PASS	.
ERCC-00134	244	.	A	C	.	PASS	.
ERCC-00134	245	.	A	C	.	PASS	.
ERCC-00134	246	.	A	C	.	PASS	.
ERCC-00134	247	.	A	C	.	PASS	.
ERCC-00134	248	.	A	C	.	PASS	.
ERCC-00134	250	.	A	C	.	PASS	.
ERCC-00134	251	.	A	C	.	PASS	.
ERCC-00134	252	.	A	C	.	PASS	.
ERCC-00134	253	.	A	C	.	PASS	.
ERCC-00134	254	.	A	C	.	PASS	.
ERCC-00134	255	.	A	C	.	PASS	.
ERCC-00134	256	.	A	C	.	PASS	.
ERCC-00134	257	.	A	C	.	PASS	.
ERCC-00134	258	.	A	C	.	PASS	.
ERCC-00134	259	.	A	C	.	PASS	.
ERCC-00134	260	.	A	C	.	PASS	.
ERCC-00134	261	.	A	C	.	PASS	.
ERCC-00134	262	.	A	C	.	PASS	.
ERCC-00134	263	.	A	C	.	PASS	.
ERCC-00134	264	.	A	C	.	PASS	.
ERCC-00134	265	.	A	C	.	PASS	.
ERCC-00134	266	.	A	C	.	PASS	.
ERCC-00134	267	.	A	C	.	PASS	.
ERCC-00134	268	.	A	C	.	PASS	.
ERCC-00134	269	.	A	C	.	PASS	.
ERCC-00134	270	.	A	C	.	PASS	.
ERCC-00134	271	.	A	C	.	PASS	.
ERCC-00134	272	.	A	C	.	PASS	.
ERCC-00134	273	.	A	C	.	PASS	.
ERCC-00134	274	.	A	C	.	PASS	.
ERCC-00136	955	.	A	C	.	PASS	.
ERCC-00136	956	.	A	C	.	PASS	.
ERCC-00136	957	.	A	C	.	PASS	.
ERCC-00136	958	.	A	C	.	PASS	.
ERCC-00136	959	.	A	C	.	PASS	.
ERCC-00136	960	.	A	C	.	PASS	.
ERCC-00136	961	.	A	C	.	PASS	.
ERCC-00136	962	.	A	C	.	PASS	.
ERCC-00136	963	.	A	C	.	PASS	.
ERCC-00136	964	.	A	C	.	PASS	.
ERCC-00136	965	.	A	C	.	PASS	.
ERCC-00136	966	.	A	C	.	PASS	.
ERCC-00136	967	.	A	C	.	PASS	.
ERCC-00136	968	.	A	C	.	PASS	.
ERCC-00136	969	.	A	C	.	PASS	.
ERCC-00136	970	.	A	C	.	PASS	.
ERCC-00136	971	.	A	C	.	PASS	.
ERCC-00136	972	.	A	C	.	PASS	.
ERCC-00136	973	.	A	C	.	PASS	.
ERCC-00136	974	.	A	C	.	PASS	.
ERCC-00136	975	.	A	C	.	PASS	.
ERCC-00136	976	.	A	C	.	PASS	.
ERCC-00136	977	.	A	C	.	PASS	.
ERCC-00136	978	.	A	C	.	PASS	.
ERCC-00136	979	.	A	C	.	PASS	.
ERCC-00136	980	.	A	C	.	PASS	.
ERCC-00136	981	.	A	C	.	PASS	.
ERCC-00136	982	.	A	C	.	PASS	.
ERCC-00136	983	.	A	C	.	PASS	.
ERCC-00136	984	.	A	C	.	PASS	.
ERCC-00136	985	.	A	C	.	PASS	.
ERCC-00136	986	.	A	C	.	PASS	.
ERCC-00136	987	.	A	C	.	PASS	.
ERCC-00136	988	.	A	C	.	PASS	.
ERCC-00136	989	.	A	C	.	PASS	.
ERCC-00136	990	.	A	C	.	PASS	.
ERCC-00136	991	.	A	C	.	PASS	.
ERCC-00136	992	.	A	C	.	PASS	.
ERCC-00136	993	.	A	C	.	PASS	.
ERCC-00136	994	.	A	C	.	PASS	.
ERCC-00136	995	.	A	C	.	PASS	.
ERCC-00136	996	.	A	C	.	PASS	.
ERCC-00136	997	.	A	C	.	PASS	.
ERCC-00136	998	.	A	C	.	PASS	.
ERCC-00136	999	.	A	C	.	PASS	.
ERCC-00136	1000	.	A	C	.	PASS	.
ERCC-00136	1001	.	A	C	.	PASS	.
ERCC-00136	1002	.	A	C	.	PASS	.
ERCC-00136	1003	.	A	C	.	PASS	.
ERCC-00136	1004	.	A	C	.	PASS	.
ERCC-00136	1005	.	A	C	.	PASS	.
ERCC-00136	1012	.	A	C	.	PASS	.
ERCC-00136	1013	.	A	C	.	PASS	.
ERCC-00136	1014	.	A	C	.	PASS	.
ERCC-00136	1015	.	A	C	.	PASS	.
ERCC-00136	1016	.	A	C	.	PASS	.
ERCC-00136	1017	.	A	C	.	PASS	.
ERCC-00136	1018	.	A	C	.	PASS	.
ERCC-00136	1019	.	A	C	.	PASS	.
ERCC-00136	1020	.	A	C	.	PASS	.
ERCC-00136	1021	.	A	C	.	PASS	.
ERCC-00136	1022	.	A	C	.	PASS	.
ERCC-00136	1023	.	A	C	.	PASS	.
ERCC-00136	1024	.	A	C	.	PASS	.
ERCC-00136	1025	.	A	C	.	PASS	.
ERCC-00136	1026	.	A	C	.	PASS	.
ERCC-00136	1027	.	A	C	.	PASS	.
ERCC-00136	1028	.	A	C	.	PASS	.
ERCC-00136	1029	.	A	C	.	PASS	.
ERCC-00136	1030	.	A	C	.	PASS	.
ERCC-00136	1031	.	A	C	.	PASS	.
ERCC-00136	1032	.	A	C	.	PASS	.
ERCC-00136	1033	.	A	C	.	PASS	.
ERCC-00137	463	.	A	C	.	PASS	.
ERCC-00137	464	.	A	C	.	PASS	.
ERCC-00137	465	.	A	C	.	PASS	.
ERCC-00137	466	.	A	C	.	PASS	.
ERCC-00137	467	.	A	C	.	PASS	.
ERCC-00137	468	.	A	C	.	PASS	.
ERCC-00137	469	.	A	C	.	PASS	.
ERCC-00137	470	.	A	C	.	PASS	.
ERCC-00137	471	.	A	C	.	PASS	.
ERCC-00137	472	.	A	C	.	PASS	.
ERCC-00137	473	.	A	C	.	PASS	.
ERCC-00137	474	.	A	C	.	PASS	.
ERCC-00137	475	.	A	C	.	PASS	.
ERCC-00137	476	.	A	C	.	PASS	.
ERCC-00137	477	.	A	C	.	PASS	.
ERCC-00137	478	.	A	C	.	PASS	.
ERCC-00137	479	.	A	C	.	PASS	.
ERCC-00137	480	.	A	C	.	PASS	.
ERCC-00137	481	.	A	C	.	PASS	.
ERCC-00137	482	.	A	C	.	PASS	.
ERCC-00137	483	.	A	C	.	PASS	.
ERCC-00137	484	.	A	C	.	PASS	.
ERCC-00137	485	.	A	C	.	PASS	.
ERCC-00137	486	.	A	C	.	PASS	.
ERCC-00137	487	.	A	C	.	PASS	.
ERCC-00137	488	.	A	C	.	PASS	.
ERCC-00137	489	.	A	C	.	PASS	.
ERCC-00137	490	.	A	C	.	PASS	.
ERCC-00137	491	.	A	C	.	PASS	.
ERCC-00137	492	.	A	C	.	PASS	.
ERCC-00137	493	.	A	C	.	PASS	.
ERCC-00137	494	.	A	C	.	PASS	.
ERCC-00137	495	.	A	C	.	PASS	.
ERCC-00137	496	.	A	C	.	PASS	.
ERCC-00137	497	.	A	C	.	PASS	.
ERCC-00137	498	.	A	C	.	PASS	.
ERCC-00137	499	.	A	C	.	PASS	.
ERCC-00137	500	.	A	C	.	PASS	.
ERCC-00137	501	.	A	C	.	PASS	.
ERCC-00137	502	.	A	C	.	PASS	.
ERCC-00137	503	.	A	C	.	PASS	.
ERCC-00137	504	.	A	C	.	PASS	.
ERCC-00137	505	.	A	C	.	PASS	.
ERCC-00137	506	.	A	C	.	PASS	.
ERCC-00137	507	.	A	C	.	PASS	.
ERCC-00137	508	.	A	C	.	PASS	.
ERCC-00137	509	.	A	C	.	PASS	.
ERCC-00137	510	.	A	C	.	PASS	.
ERCC-00137	511	.	A	C	.	PASS	.
ERCC-00137	512	.	A	C	.	PASS	.
ERCC-00137	513	.	A	C	.	PASS	.
ERCC-00137	514	.	A	C	.	PASS	.
ERCC-00137	515	.	A	C	.	PASS	.
ERCC-00137	516	.	A	C	.	PASS	.
ERCC-00137	517	.	A	C	.	PASS	.
ERCC-00137	518	.	A	C	.	PASS	.
ERCC-00137	519	.	A	C	.	PASS	.
ERCC-00137	520	.	A	C	.	PASS	.
ERCC-00137	521	.	A	C	.	PASS	.
ERCC-00137	522	.	A	C	.	PASS	.
ERCC-00137	523	.	A	C	.	PASS	.
ERCC-00137	524	.	A	C	.	PASS	.
ERCC-00137	525	.	A	C	.	PASS	.
ERCC-00137	526	.	A	C	.	PASS	.
ERCC-00137	527	.	A	C	.	PASS	.
ERCC-00137	528	.	A	C	.	PASS	.
ERCC-00137	529	.	A	C	.	PASS	.
ERCC-00137	530	.	A	C	.	PASS	.
ERCC-00137	531	.	A	C	.	PASS	.
ERCC-00137	532	.	A	C	.	PASS	.
ERCC-00137	533	.	A	C	.	PASS	.
ERCC-00137	534	.	A	C	.	PASS	.
ERCC-00137	535	.	A	C	.	PASS	.
ERCC-00137	536	.	A	C	.	PASS	.
ERCC-00137	537	.	A	C	.	PASS	.
ERCC-00138	2	.	A	C	.	PASS	.
ERCC-00138	403	.	A	C	.	PASS	.
ERCC-00138	541	.	A	C	.	PASS	.
ERCC-00138	542	.	A	C	.	PASS	.
ERCC-00138	938	.	A	C	.	PASS	.
ERCC-00138	939	.	A	C	.	PASS	.
ERCC-00138	940	.	A	C	.	PASS	.
ERCC-00138	941	.	A	C	.	PASS	.
ERCC-00138	942	.	A	C	.	PASS	.
ERCC-00138	943	.	A	C	.	PASS	.
ERCC-00138	944	.	A	C	.	PASS	.
ERCC-00138	945	.	A	C	.	PASS	.
ERCC-00138	946	.	A	C	.	PASS	.
ERCC-00138	947	.	A	C	.	PASS	.
ERCC-00138	948	.	A	C	.	PASS	.
ERCC-00138	949	.	A	C	.	PASS	.
ERCC-00138	950	.	A	C	.	PASS	.
ERCC-00138	951	.	A	C	.	PASS	.
ERCC-00138	952	.	A	C	.	PASS	.
ERCC-00138	953	.	A	C	.	PASS	.
ERCC-00138	954	.	A	C	.	PASS	.
ERCC-00138	955	.	A	C	.	PASS	.
ERCC-00138	956	.	A	C	.	PASS	.
ERCC-00138	957	.	A	C	.	PASS	.
ERCC-00138	958	.	A	C	.	PASS	.
ERCC-00138	959	.	A	C	.	PASS	.
ERCC-00138	960	.	A	C	.	PASS	.
ERCC-00138	961	.	A	C	.	PASS	.
ERCC-00138	962	.	A	C	.	PASS	.
ERCC-00138	963	.	A	C	.	PASS	.
ERCC-00138	964	.	A	C	.	PASS	.
ERCC-00138	965	.	A	C	.	PASS	.
ERCC-00138	966	.	A	C	.	PASS	.
ERCC-00138	967	.	A	C	.	PASS	.
ERCC-00138	968	.	A	C	.	PASS	.
ERCC-00138	969	.	A	C	.	PASS	.
ERCC-00138	970	.	A	C	.	PASS	.
ERCC-00138	971	.	A	C	.	PASS	.
ERCC-00138	972	.	A	C	.	PASS	.
ERCC-00138	973	.	A	C	.	PASS	.
ERCC-00138	974	.	A	C	.	PASS	.
ERCC-00138	975	.	A	C	.	PASS	.
ERCC-00138	976	.	A	C	.	PASS	.
ERCC-00138	977	.	A	C	.	PASS	.
ERCC-00138	978	.	A	C	.	PASS	.
ERCC-00138	979	.	A	C	.	PASS	.
ERCC-00138	980	.	A	C	.	PASS	.
ERCC-00138	981	.	A	C	.	PASS	.
ERCC-00138	982	.	A	C	.	PASS	.
ERCC-00138	983	.	A	C	.	PASS	.
ERCC-00138	984	.	A	C	.	PASS	.
ERCC-00138	985	.	A	C	.	PASS	.
ERCC-00138	986	.	A	C	.	PASS	.
ERCC-00138	987	.	A	C	.	PASS	.
ERCC-00138	988	.	A	C	.	PASS	.
ERCC-00138	994	.	A	C	.	PASS	.
ERCC-00138	995	.	A	C	.	PASS	.
ERCC-00138	998	.	A	C	.	PASS	.
ERCC-00138	999	.	A	C	.	PASS	.
ERCC-00138	1000	.	A	C	.	PASS	.
ERCC-00138	1001	.	A	C	.	PASS	.
ERCC-00138	1002	.	A	C	.	PASS	.
ERCC-00138	1003	.	A	C	.	PASS	.
ERCC-00138	1004	.	A	C	.	PASS	.
ERCC-00138	1005	.	A	C	.	PASS	.
ERCC-00138	1006	.	A	C	.	PASS	.
ERCC-00138	1007	.	A	C	.	PASS	.
ERCC-00138	1008	.	A	C	.	PASS	.
ERCC-00138	1009	.	A	C	.	PASS	.
ERCC-00138	1010	.	A	C	.	PASS	.
ERCC-00138	1011	.	A	C	.	PASS	.
ERCC-00138	1012	.	A	C	.	PASS	.
ERCC-00138	1013	.	A	C	.	PASS	.
ERCC-00138	1014	.	A	C	.	PASS	.
ERCC-00138	1015	.	A	C	.	PASS	.
ERCC-00138	1016	.	A	C	.	PASS	.
ERCC-00138	1017	.	A	C	.	PASS	.
ERCC-00138	1018	.	A	C	.	PASS	.
ERCC-00138	1019	.	A	C	.	PASS	.
ERCC-00138	1020	.	A	C	.	PASS	.
ERCC-00138	1021	.	A	C	.	PASS	.
ERCC-00138	1022	.	A	C	.	PASS	.
ERCC-00142	419	.	A	C	.	PASS	.
ERCC-00142	420	.	A	C	.	PASS	.
ERCC-00142	421	.	A	C	.	PASS	.
ERCC-00142	422	.	A	C	.	PASS	.
ERCC-00142	423	.	A	C	.	PASS	.
ERCC-00142	424	.	A	C	.	PASS	.
ERCC-00142	425	.	A	C	.	PASS	.
ERCC-00142	426	.	A	C	.	PASS	.
ERCC-00142	427	.	A	C	.	PASS	.
ERCC-00142	428	.	A	C	.	PASS	.
ERCC-00142	429	.	A	C	.	PASS	.
ERCC-00142	430	.	A	C	.	PASS	.
ERCC-00142	431	.	A	C	.	PASS	.
ERCC-00142	432	.	A	C	.	PASS	.
ERCC-00142	433	.	A	C	.	PASS	.
ERCC-00142	434	.	A	C	.	PASS	.
ERCC-00142	435	.	A	C	.	PASS	.
ERCC-00142	436	.	A	C	.	PASS	.
ERCC-00142	437	.	A	C	.	PASS	.
ERCC-00142	438	.	A	C	.	PASS	.
ERCC-00142	439	.	A	C	.	PASS	.
ERCC-00142	440	.	A	C	.	PASS	.
ERCC-00142	441	.	A	C	.	PASS	.
ERCC-00142	442	.	A	C	.	PASS	.
ERCC-00142	443	.	A	C	.	PASS	.
ERCC-00142	444	.	A	C	.	PASS	.
ERCC-00142	445	.	A	C	.	PASS	.
ERCC-00142	446	.	A	C	.	PASS	.
ERCC-00142	447	.	A	C	.	PASS	.
ERCC-00142	448	.	A	C	.	PASS	.
ERCC-00142	449	.	A	C	.	PASS	.
ERCC-00142	450	.	A	C	.	PASS	.
ERCC-00142	451	.	A	C	.	PASS	.
ERCC-00142	452	.	A	C	.	PASS	.
ERCC-00142	453	.	A	C	.	PASS	.
ERCC-00142	454	.	A	C	.	PASS	.
ERCC-00142	455	.	A	C	.	PASS	.
ERCC-00142	456	.	A	C	.	PASS	.
ERCC-00142	457	.	A	C	.	PASS	.
ERCC-00142	458	.	A	C	.	PASS	.
ERCC-00142	459	.	A	C	.	PASS	.
ERCC-00142	460	.	A	C	.	PASS	.
ERCC-00142	461	.	A	C	.	PASS	.
ERCC-00142	462	.	A	C	.	PASS	.
ERCC-00142	463	.	A	C	.	PASS	.
ERCC-00142	464	.	A	C	.	PASS	.
ERCC-00142	465	.	A	C	.	PASS	.
ERCC-00142	466	.	A	C	.	PASS	.
ERCC-00142	467	.	A	C	.	PASS	.
ERCC-00142	468	.	A	C	.	PASS	.
ERCC-00142	469	.	A	C	.	PASS	.
ERCC-00142	471	.	A	C	.	PASS	.
ERCC-00142	472	.	A	C	.	PASS	.
ERCC-00142	473	.	A	C	.	PASS	.
ERCC-00142	474	.	A	C	.	PASS	.
ERCC-00142	475	.	A	C	.	PASS	.
ERCC-00142	476	.	A	C	.	PASS	.
ERCC-00142	477	.	A	C	.	PASS	.
ERCC-00142	478	.	A	C	.	PASS	.
ERCC-00142	479	.	A	C	.	PASS	.
ERCC-00142	480	.	A	C	.	PASS	.
ERCC-00142	481	.	A	C	.	PASS	.
ERCC-00142	482	.	A	C	.	PASS	.
ERCC-00142	483	.	A	C	.	PASS	.
ERCC-00142	484	.	A	C	.	PASS	.
ERCC-00142	485	.	A	C	.	PASS	.
ERCC-00142	486	.	A	C	.	PASS	.
ERCC-00142	487	.	A	C	.	PASS	.
ERCC-00142	488	.	A	C	.	PASS	.
ERCC-00142	489	.	A	C	.	PASS	.
ERCC-00142	490	.	A	C	.	PASS	.
ERCC-00142	491	.	A	C	.	PASS	.
ERCC-00142	492	.	A	C	.	PASS	.
ERCC-00142	493	.	A	C	.	PASS	.
ERCC-00143	705	.	A	C	.	PASS	.
ERCC-00143	706	.	A	C	.	PASS	.
ERCC-00143	707	.	A	C	.	PASS	.
ERCC-00143	708	.	A	C	.	PASS	.
ERCC-00143	709	.	A	C	.	PASS	.
ERCC-00143	710	.	A	C	.	PASS	.
ERCC-00143	711	.	A	C	.	PASS	.
ERCC-00143	712	.	A	C	.	PASS	.
ERCC-00143	713	.	A	C	.	PASS	.
ERCC-00143	714	.	A	C	.	PASS	.
ERCC-00143	715	.	A	C	.	PASS	.
ERCC-00143	716	.	A	C	.	PASS	.
ERCC-00143	717	.	A	C	.	PASS	.
ERCC-00143	718	.	A	C	.	PASS	.
ERCC-00143	719	.	A	C	.	PASS	.
ERCC-00143	720	.	A	C	.	PASS	.
ERCC-00143	721	.	A	C	.	PASS	.
ERCC-00143	722	.	A	C	.	PASS	.
ERCC-00143	723	.	A	C	.	PASS	.
ERCC-00143	724	.	A	C	.	PASS	.
ERCC-00143	725	.	A	C	.	PASS	.
ERCC-00143	726	.	A	C	.	PASS	.
ERCC-00143	727	.	A	C	.	PASS	.
ERCC-00143	728	.	A	C	.	PASS	.
ERCC-00143	729	.	A	C	.	PASS	.
ERCC-00143	730	.	A	C	.	PASS	.
ERCC-00143	731	.	A	C	.	PASS	.
ERCC-00143	732	.	A	C	.	PASS	.
ERCC-00143	733	.	A	C	.	PASS	.
ERCC-00143	734	.	A	C	.	PASS	.
ERCC-00143	735	.	A	C	.	PASS	.
ERCC-00143	736	.	A	C	.	PASS	.
ERCC-00143	737	.	A	C	.	PASS	.
ERCC-00143	738	.	A	C	.	PASS	.
ERCC-00143	739	.	A	C	.	PASS	.
ERCC-00143	740	.	A	C	.	PASS	.
ERCC-00143	741	.	A	C	.	PASS	.
ERCC-00143	742	.	A	C	.	PASS	.
ERCC-00143	743	.	A	C	.	PASS	.
ERCC-00143	744	.	A	C	.	PASS	.
ERCC-00143	745	.	A	C	.	PASS	.
ERCC-00143	746	.	A	C	.	PASS	.
ERCC-00143	747	.	A	C	.	PASS	.
ERCC-00143	748	.	A	C	.	PASS	.
ERCC-00143	749	.	A	C	.	PASS	.
ERCC-00143	750	.	A	C	.	PASS	.
ERCC-00143	751	.	A	C	.	PASS	.
ERCC-00143	752	.	A	C	.	PASS	.
ERCC-00143	753	.	A	C	.	PASS	.
ERCC-00143	754	.	A	C	.	PASS	.
ERCC-00143	755	.	A	C	.	PASS	.
ERCC-00143	760	.	A	C	.	PASS	.
ERCC-00143	761	.	A	C	.	PASS	.
ERCC-00143	762	.	A	C	.	PASS	.
ERCC-00143	763	.	A	C	.	PASS	.
ERCC-00143	764	.	A	C	.	PASS	.
ERCC-00143	765	.	A	C	.	PASS	.
ERCC-00143	766	.	A	C	.	PASS	.
ERCC-00143	767	.	A	C	.	PASS	.
ERCC-00143	768	.	A	C	.	PASS	.
ERCC-00143	769	.	A	C	.	PASS	.
ERCC-00143	770	.	A	C	.	PASS	.
ERCC-00143	771	.	A	C	.	PASS	.
ERCC-00143	772	.	A	C	.	PASS	.
ERCC-00143	773	.	A	C	.	PASS	.
ERCC-00143	774	.	A	C	.	PASS	.
ERCC-00143	775	.	A	C	.	PASS	.
ERCC-00143	776	.	A	C	.	PASS	.
ERCC-00143	777	.	A	C	.	PASS	.
ERCC-00143	778	.	A	C	.	PASS	.
ERCC-00143	779	.	A	C	.	PASS	.
ERCC-00143	780	.	A	C	.	PASS	.
ERCC-00143	781	.	A	C	.	PASS	.
ERCC-00143	782	.	A	C	.	PASS	.
ERCC-00143	783	.	A	C	.	PASS	.
ERCC-00143	784	.	A	C	.	PASS	.
ERCC-00144	460	.	A	C	.	PASS	.
ERCC-00144	461	.	A	C	.	PASS	.
ERCC-00144	462	.	A	C	.	PASS	.
ERCC-00144	463	.	A	C	.	PASS	.
ERCC-00144	464	.	A	C	.	PASS	.
ERCC-00144	465	.	A	C	.	PASS	.
ERCC-00144	466	.	A	C	.	PASS	.
ERCC-00144	467	.	A	C	.	PASS	.
ERCC-00144	468	.	A	C	.	PASS	.
ERCC-00144	469	.	A	C	.	PASS	.
ERCC-00144	470	.	A	C	.	PASS	.
ERCC-00144	471	.	A	C	.	PASS	.
ERCC-00144	472	.	A	C	.	PASS	.
ERCC-00144	473	.	A	C	.	PASS	.
ERCC-00144	474	.	A	C	.	PASS	.
ERCC-00144	475	.	A	C	.	PASS	.
ERCC-00144	476	.	A	C	.	PASS	.
ERCC-00144	477	.	A	C	.	PASS	.
ERCC-00144	478	.	A	C	.	PASS	.
ERCC-00144	479	.	A	C	.	PASS	.
ERCC-00144	480	.	A	C	.	PASS	.
ERCC-00144	481	.	A	C	.	PASS	.
ERCC-00144	482	.	A	C	.	PASS	.
ERCC-00144	483	.	A	C	.	PASS	.
ERCC-00144	484	.	A	C	.	PASS	.
ERCC-00144	485	.	A	C	.	PASS	.
ERCC-00144	486	.	A	C	.	PASS	.
ERCC-00144	487	.	A	C	.	PASS	.
ERCC-00144	488	.	A	C	.	PASS	.
ERCC-00144	489	.	A	C	.	PASS	.
ERCC-00144	490	.	A	C	.	PASS	.
ERCC-00144	491	.	A	C	.	PASS	.
ERCC-00144	492	.	A	C	.	PASS	.
ERCC-00144	493	.	A	C	.	PASS	.
ERCC-00144	494	.	A	C	.	PASS	.
ERCC-00144	495	.	A	C	.	PASS	.
ERCC-00144	496	.	A	C	.	PASS	.
ERCC-00144	497	.	A	C	.	PASS	.
ERCC-00144	498	.	A	C	.	PASS	.
ERCC-00144	499	.	A	C	.	PASS	.
ERCC-00144	500	.	A	C	.	PASS	.
ERCC-00144	501	.	A	C	.	PASS	.
ERCC-00144	502	.	A	C	.	PASS	.
ERCC-00144	503	.	A	C	.	PASS	.
ERCC-00144	504	.	A	C	.	PASS	.
ERCC-00144	505	.	A	C	.	PASS	.
ERCC-00144	506	.	A	C	.	PASS	.
ERCC-00144	507	.	A	C	.	PASS	.
ERCC-00144	508	.	A	C	.	PASS	.
ERCC-00144	509	.	A	C	.	PASS	.
ERCC-00144	510	.	A	C	.	PASS	.
ERCC-00144	514	.	A	C	.	PASS	.
ERCC-00144	515	.	A	C	.	PASS	.
ERCC-00144	516	.	A	C	.	PASS	.
ERCC-00144	517	.	A	C	.	PASS	.
ERCC-00144	518	.	A	C	.	PASS	.
ERCC-00144	519	.	A	C	.	PASS	.
ERCC-00144	520	.	A	C	.	PASS	.
ERCC-00144	521	.	A	C	.	PASS	.
ERCC-00144	522	.	A	C	.	PASS	.
ERCC-00144	523	.	A	C	.	PASS	.
ERCC-00144	524	.	A	C	.	PASS	.
ERCC-00144	525	.	A	C	.	PASS	.
ERCC-00144	526	.	A	C	.	PASS	.
ERCC-00144	527	.	A	C	.	PASS	.
ERCC-00144	528	.	A	C	.	PASS	.
ERCC-00144	529	.	A	C	.	PASS	.
ERCC-00144	530	.	A	C	.	PASS	.
ERCC-00144	531	.	A	C	.	PASS	.
ERCC-00144	532	.	A	C	.	PASS	.
ERCC-00144	533	.	A	C	.	PASS	.
ERCC-00144	534	.	A	C	.	PASS	.
ERCC-00144	535	.	A	C	.	PASS	.
ERCC-00144	536	.	A	C	.	PASS	.
ERCC-00144	537	.	A	C	.	PASS	.
ERCC-00144	538	.	A	C	.	PASS	.
ERCC-00145	749	.	A	C	.	PASS	.
ERCC-00145	959	.	A	C	.	PASS	.
ERCC-00145	960	.	A	C	.	PASS	.
ERCC-00145	961	.	A	C	.	PASS	.
ERCC-00145	962	.	A	C	.	PASS	.
ERCC-00145	963	.	A	C	.	PASS	.
ERCC-00145	964	.	A	C	.	PASS	.
ERCC-00145	965	.	A	C	.	PASS	.
ERCC-00145	966	.	A	C	.	PASS	.
ERCC-00145	967	.	A	C	.	PASS	.
ERCC-00145	968	.	A	C	.	PASS	.
ERCC-00145	969	.	A	C	.	PASS	.
ERCC-00145	970	.	A	C	.	PASS	.
ERCC-00145	971	.	A	C	.	PASS	.
ERCC-00145	972	.	A	C	.	PASS	.
ERCC-00145	973	.	A	C	.	PASS	.
ERCC-00145	974	.	A	C	.	PASS	.
ERCC-00145	975	.	A	C	.	PASS	.
ERCC-00145	976	.	A	C	.	PASS	.
ERCC-00145	977	.	A	C	.	PASS	.
ERCC-00145	978	.	A	C	.	PASS	.
ERCC-00145	979	.	A	C	.	PASS	.
ERCC-00145	980	.	A	C	.	PASS	.
ERCC-00145	981	.	A	C	.	PASS	.
ERCC-00145	982	.	A	C	.	PASS	.
ERCC-00145	983	.	A	C	.	PASS	.
ERCC-00145	984	.	A	C	.	PASS	.
ERCC-00145	985	.	A	C	.	PASS	.
ERCC-00145	986	.	A	C	.	PASS	.
ERCC-00145	987	.	A	C	.	PASS	.
ERCC-00145	988	.	A	C	.	PASS	.
ERCC-00145	989	.	A	C	.	PASS	.
ERCC-00145	990	.	A	C	.	PASS	.
ERCC-00145	991	.	A	C	.	PASS	.
ERCC-00145	992	.	A	C	.	PASS	.
ERCC-00145	993	.	A	C	.	PASS	.
ERCC-00145	994	.	A	C	.	PASS	.
ERCC-00145	995	.	A	C	.	PASS	.
ERCC-00145	996	.	A	C	.	PASS	.
ERCC-00145	997	.	A	C	.	PASS	.
ERCC-00145	998	.	A	C	.	PASS	.
ERCC-00145	999	.	A	C	.	PASS	.
ERCC-00145	1000	.	A	C	.	PASS	.
ERCC-00145	1001	.	A	C	.	PASS	.
ERCC-00145	1002	.	A	C	.	PASS	.
ERCC-00145	1003	.	A	C	.	PASS	.
ERCC-00145	1004	.	A	C	.	PASS	.
ERCC-00145	1005	.	A	C	.	PASS	.
ERCC-00145	1006	.	A	C	.	PASS	.
ERCC-00145	1007	.	A	C	.	PASS	.
ERCC-00145	1008	.	A	C	.	PASS	.
ERCC-00145	1009	.	A	C	.	PASS	.
ERCC-00145	1017	.	A	C	.	PASS	.
ERCC-00145	1018	.	A	C	.	PASS	.
ERCC-00145	1019	.	A	C	.	PASS	.
ERCC-00145	1020	.	A	C	.	PASS	.
ERCC-00145	1021	.	A	C	.	PASS	.
ERCC-00145	1022	.	A	C	.	PASS	.
ERCC-00145	1023	.	A	C	.	PASS	.
ERCC-00145	1024	.	A	C	.	PASS	.
ERCC-00145	1025	.	A	C	.	PASS	.
ERCC-00145	1026	.	A	C	.	PASS	.
ERCC-00145	1027	.	A	C	.	PASS	.
ERCC-00145	1028	.	A	C	.	PASS	.
ERCC-00145	1029	.	A	C	.	PASS	.
ERCC-00145	1030	.	A	C	.	PASS	.
ERCC-00145	1031	.	A	C	.	PASS	.
ERCC-00145	1032	.	A	C	.	PASS	.
ERCC-00145	1033	.	A	C	.	PASS	.
ERCC-00145	1034	.	A	C	.	PASS	.
ERCC-00145	1035	.	A	C	.	PASS	.
ERCC-00145	1036	.	A	C	.	PASS	.
ERCC-00145	1037	.	A	C	.	PASS	.
ERCC-00145	1038	.	A	C	.	PASS	.
ERCC-00145	1039	.	A	C	.	PASS	.
ERCC-00145	1040	.	A	C	.	PASS	.
ERCC-00145	1041	.	A	C	.	PASS	.
ERCC-00145	1042	.	A	C	.	PASS	.
ERCC-00147	942	.	A	C	.	PASS	.
ERCC-00147	943	.	A	C	.	PASS	.
ERCC-00147	944	.	A	C	.	PASS	.
ERCC-00147	945	.	A	C	.	PASS	.
ERCC-00147	946	.	A	C	.	PASS	.
ERCC-00147	947	.	A	C	.	PASS	.
ERCC-00147	948	.	A	C	.	PASS	.
ERCC-00147	949	.	A	C	.	PASS	.
ERCC-00147	950	.	A	C	.	PASS	.
ERCC-00147	951	.	A	C	.	PASS	.
ERCC-00147	952	.	A	C	.	PASS	.
ERCC-00147	953	.	A	C	.	PASS	.
ERCC-00147	954	.	A	C	.	PASS	.
ERCC-00147	955	.	A	C	.	PASS	.
ERCC-00147	956	.	A	C	.	PASS	.
ERCC-00147	957	.	A	C	.	PASS	.
ERCC-00147	958	.	A	C	.	PASS	.
ERCC-00147	959	.	A	C	.	PASS	.
ERCC-00147	960	.	A	C	.	PASS	.
ERCC-00147	961	.	A	C	.	PASS	.
ERCC-00147	962	.	A	C	.	PASS	.
ERCC-00147	963	.	A	C	.	PASS	.
ERCC-00147	964	.	A	C	.	PASS	.
ERCC-00147	965	.	A	C	.	PASS	.
ERCC-00147	966	.	A	C	.	PASS	.
ERCC-00147	967	.	A	C	.	PASS	.
ERCC-00147	968	.	A	C	.	PASS	.
ERCC-00147	969	.	A	C	.	PASS	.
ERCC-00147	970	.	A	C	.	PASS	.
ERCC-00147	971	.	A	C	.	PASS	.
ERCC-00147	972	.	A	C	.	PASS	.
ERCC-00147	973	.	A	C	.	PASS	.
ERCC-00147	974	.	A	C	.	PASS	.
ERCC-00147	975	.	A	C	.	PASS	.
ERCC-00147	976	.	A	C	.	PASS	.
ERCC-00147	977	.	A	C	.	PASS	.
ERCC-00147	978	.	A	C	.	PASS	.
ERCC-00147	979	.	A	C	.	PASS	.
ERCC-00147	980	.	A	C	.	PASS	.
ERCC-00147	981	.	A	C	.	PASS	.
ERCC-00147	982	.	A	C	.	PASS	.
ERCC-00147	983	.	A	C	.	PASS	.
ERCC-00147	984	.	A	C	.	PASS	.
ERCC-00147	985	.	A	C	.	PASS	.
ERCC-00147	986	.	A	C	.	PASS	.
ERCC-00147	987	.	A	C	.	PASS	.
ERCC-00147	988	.	A	C	.	PASS	.
ERCC-00147	989	.	A	C	.	PASS	.
ERCC-00147	990	.	A	C	.	PASS	.
ERCC-00147	991	.	A	C	.	PASS	.
ERCC-00147	992	.	A	C	.	PASS	.
ERCC-00147	1000	.	A	C	.	PASS	.
ERCC-00147	1001	.	A	C	.	PASS	.
ERCC-00147	1002	.	A	C	.	PASS	.
ERCC-00147	1003	.	A	C	.	PASS	.
ERCC-00147	1004	.	A	C	.	PASS	.
ERCC-00147	1005	.	A	C	.	PASS	.
ERCC-00147	1006	.	A	C	.	PASS	.
ERCC-00147	1007	.	A	C	.	PASS	.
ERCC-00147	1008	.	A	C	.	PASS	.
ERCC-00147	1009	.	A	C	.	PASS	.
ERCC-00147	1010	.	A	C	.	PASS	.
ERCC-00147	1011	.	A	C	.	PASS	.
ERCC-00147	1012	.	A	C	.	PASS	.
ERCC-00147	1013	.	A	C	.	PASS	.
ERCC-00147	1014	.	A	C	.	PASS	.
ERCC-00147	1015	.	A	C	.	PASS	.
ERCC-00147	1016	.	A	C	.	PASS	.
ERCC-00147	1017	.	A	C	.	PASS	.
ERCC-00147	1018	.	A	C	.	PASS	.
ERCC-00147	1019	.	A	C	.	PASS	.
ERCC-00147	1020	.	A	C	.	PASS	.
ERCC-00147	1021	.	A	C	.	PASS	.
ERCC-00147	1022	.	A	C	.	PASS	.
ERCC-00147	1023	.	A	C	.	PASS	.
ERCC-00148	418	.	A	C	.	PASS	.
ERCC-00148	419	.	A	C	.	PASS	.
ERCC-00148	420	.	A	C	.	PASS	.
ERCC-00148	421	.	A	C	.	PASS	.
ERCC-00148	422	.	A	C	.	PASS	.
ERCC-00148	423	.	A	C	.	PASS	.
ERCC-00148	424	.	A	C	.	PASS	.
ERCC-00148	425	.	A	C	.	PASS	.
ERCC-00148	426	.	A	C	.	PASS	.
ERCC-00148	427	.	A	C	.	PASS	.
ERCC-00148	428	.	A	C	.	PASS	.
ERCC-00148	429	.	A	C	.	PASS	.
ERCC-00148	430	.	A	C	.	PASS	.
ERCC-00148	431	.	A	C	.	PASS	.
ERCC-00148	432	.	A	C	.	PASS	.
ERCC-00148	433	.	A	C	.	PASS	.
ERCC-00148	434	.	A	C	.	PASS	.
ERCC-00148	435	.	A	C	.	PASS	.
ERCC-00148	436	.	A	C	.	PASS	.
ERCC-00148	437	.	A	C	.	PASS	.
ERCC-00148	438	.	A	C	.	PASS	.
ERCC-00148	439	.	A	C	.	PASS	.
ERCC-00148	440	.	A	C	.	PASS	.
ERCC-00148	441	.	A	C	.	PASS	.
ERCC-00148	442	.	A	C	.	PASS	.
ERCC-00148	443	.	A	C	.	PASS	.
ERCC-00148	444	.	A	C	.	PASS	.
ERCC-00148	445	.	A	C	.	PASS	.
ERCC-00148	446	.	A	C	.	PASS	.
ERCC-00148	447	.	A	C	.	PASS	.
ERCC-00148	448	.	A	C	.	PASS	.
ERCC-00148	449	.	A	C	.	PASS	.
ERCC-00148	450	.	A	C	.	PASS	.
ERCC-00148	451	.	A	C	.	PASS	.
ERCC-00148	452	.	A	C	.	PASS	.
ERCC-00148	453	.	A	C	.	PASS	.
ERCC-00148	454	.	A	C	.	PASS	.
ERCC-00148	455	.	A	C	.	PASS	.
ERCC-00148	456	.	A	C	.	PASS	.
ERCC-00148	457	.	A	C	.	PASS	.
ERCC-00148	458	.	A	C	.	PASS	.
ERCC-00148	459	.	A	C	.	PASS	.
ERCC-00148	460	.	A	C	.	PASS	.
ERCC-00148	461	.	A	C	.	PASS	.
ERCC-00148	462	.	A	C	.	PASS	.
ERCC-00148	463	.	A	C	.	PASS	.
ERCC-00148	464	.	A	C	.	PASS	.
ERCC-00148	465	.	A	C	.	PASS	.
ERCC-00148	466	.	A	C	.	PASS	.
ERCC-00148	467	.	A	C	.	PASS	.
ERCC-00148	468	.	A	C	.	PASS	.
ERCC-00148	471	.	A	C	.	PASS	.
ERCC-00148	472	.	A	C	.	PASS	.
ERCC-00148	473	.	A	C	.	PASS	.
ERCC-00148	474	.	A	C	.	PASS	.
ERCC-00148	475	.	A	C	.	PASS	.
ERCC-00148	476	.	A	C	.	PASS	.
ERCC-00148	477	.	A	C	.	PASS	.
ERCC-00148	478	.	A	C	.	PASS	.
ERCC-00148	479	.	A	C	.	PASS	.
ERCC-00148	480	.	A	C	.	PASS	.
ERCC-00148	481	.	A	C	.	PASS	.
ERCC-00148	482	.	A	C	.	PASS	.
ERCC-00148	483	.	A	C	.	PASS	.
ERCC-00148	484	.	A	C	.	PASS	.
ERCC-00148	485	.	A	C	.	PASS	.
ERCC-00148	486	.	A	C	.	PASS	.
ERCC-00148	487	.	A	C	.	PASS	.
ERCC-00148	488	.	A	C	.	PASS	.
ERCC-00148	489	.	A	C	.	PASS	.
ERCC-00148	490	.	A	C	.	PASS	.
ERCC-00148	491	.	A	C	.	PASS	.
ERCC-00148	492	.	A	C	.	PASS	.
ERCC-00148	493	.	A	C	.	PASS	.
ERCC-00148	494	.	A	C	.	PASS	.
ERCC-00150	666	.	A	C	.	PASS	.
ERCC-00150	667	.	A	C	.	PASS	.
ERCC-00150	668	.	A	C	.	PASS	.
ERCC-00150	669	.	A	C	.	PASS	.
ERCC-00150	670	.	A	C	.	PASS	.
ERCC-00150	671	.	A	C	.	PASS	.
ERCC-00150	672	.	A	C	.	PASS	.
ERCC-00150	673	.	A	C	.	PASS	.
ERCC-00150	674	.	A	C	.	PASS	.
ERCC-00150	675	.	A	C	.	PASS	.
ERCC-00150	676	.	A	C	.	PASS	.
ERCC-00150	677	.	A	C	.	PASS	.
ERCC-00150	678	.	A	C	.	PASS	.
ERCC-00150	679	.	A	C	.	PASS	.
ERCC-00150	680	.	A	C	.	PASS	.
ERCC-00150	681	.	A	C	.	PASS	.
ERCC-00150	682	.	A	C	.	PASS	.
ERCC-00150	683	.	A	C	.	PASS	.
ERCC-00150	684	.	A	C	.	PASS	.
ERCC-00150	685	.	A	C	.	PASS	.
ERCC-00150	686	.	A	C	.	PASS	.
ERCC-00150	687	.	A	C	.	PASS	.
ERCC-00150	688	.	A	C	.	PASS	.
ERCC-00150	689	.	A	C	.	PASS	.
ERCC-00150	690	.	A	C	.	PASS	.
ERCC-00150	691	.	A	C	.	PASS	.
ERCC-00150	692	.	A	C	.	PASS	.
ERCC-00150	693	.	A	C	.	PASS	.
ERCC-00150	694	.	A	C	.	PASS	.
ERCC-00150	695	.	A	C	.	PASS	.
ERCC-00150	696	.	A	C	.	PASS	.
ERCC-00150	697	.	A	C	.	PASS	.
ERCC-00150	698	.	A	C	.	PASS	.
ERCC-00150	699	.	A	C	.	PASS	.
ERCC-00150	700	.	A	C	.	PASS	.
ERCC-00150	701	.	A	C	.	PASS	.
ERCC-00150	702	.	A	C	.	PASS	.
ERCC-00150	703	.	A	C	.	PASS	.
ERCC-00150	704	.	A	C	.	PASS	.
ERCC-00150	705	.	A	C	.	PASS	.
ERCC-00150	706	.	A	C	.	PASS	.
ERCC-00150	707	.	A	C	.	PASS	.
ERCC-00150	708	.	A	C	.	PASS	.
ERCC-00150	709	.	A	C	.	PASS	.
ERCC-00150	710	.	A	C	.	PASS	.
ERCC-00150	711	.	A	C	.	PASS	.
ERCC-00150	712	.	A	C	.	PASS	.
ERCC-00150	713	.	A	C	.	PASS	.
ERCC-00150	714	.	A	C	.	PASS	.
ERCC-00150	715	.	A	C	.	PASS	.
ERCC-00150	716	.	A	C	.	PASS	.
ERCC-00150	720	.	A	C	.	PASS	.
ERCC-00150	721	.	A	C	.	PASS	.
ERCC-00150	722	.	A	C	.	PASS	.
ERCC-00150	723	.	A	C	.	PASS	.
ERCC-00150	724	.	A	C	.	PASS	.
ERCC-00150	725	.	A	C	.	PASS	.
ERCC-00150	726	.	A	C	.	PASS	.
ERCC-00150	727	.	A	C	.	PASS	.
ERCC-00150	728	.	A	C	.	PASS	.
ERCC-00150	729	.	A	C	.	PASS	.
ERCC-00150	730	.	A	C	.	PASS	.
ERCC-00150	731	.	A	C	.	PASS	.
ERCC-00150	732	.	A	C	.	PASS	.
ERCC-00150	733	.	A	C	.	PASS	.
ERCC-00150	734	.	A	C	.	PASS	.
ERCC-00150	735	.	A	C	.	PASS	.
ERCC-00150	736	.	A	C	.	PASS	.
ERCC-00150	737	.	A	C	.	PASS	.
ERCC-00150	738	.	A	C	.	PASS	.
ERCC-00150	739	.	A	C	.	PASS	.
ERCC-00150	740	.	A	C	.	PASS	.
ERCC-00150	741	.	A	C	.	PASS	.
ERCC-00150	742	.	A	C	.	PASS	.
ERCC-00150	743	.	A	C	.	PASS	.
ERCC-00154	462	.	A	C	.	PASS	.
ERCC-00154	463	.	A	C	.	PASS	.
ERCC-00154	464	.	A	C	.	PASS	.
ERCC-00154	465	.	A	C	.	PASS	.
ERCC-00154	466	.	A	C	.	PASS	.
ERCC-00154	467	.	A	C	.	PASS	.
ERCC-00154	468	.	A	C	.	PASS	.
ERCC-00154	469	.	A	C	.	PASS	.
ERCC-00154	470	.	A	C	.	PASS	.
ERCC-00154	471	.	A	C	.	PASS	.
ERCC-00154	472	.	A	C	.	PASS	.
ERCC-00154	473	.	A	C	.	PASS	.
ERCC-00154	474	.	A	C	.	PASS	.
ERCC-00154	475	.	A	C	.	PASS	.
ERCC-00154	476	.	A	C	.	PASS	.
ERCC-00154	477	.	A	C	.	PASS	.
ERCC-00154	478	.	A	C	.	PASS	.
ERCC-00154	479	.	A	C	.	PASS	.
ERCC-00154	480	.	A	C	.	PASS	.
ERCC-00154	481	.	A	C	.	PASS	.
ERCC-00154	482	.	A	C	.	PASS	.
ERCC-00154	483	.	A	C	.	PASS	.
ERCC-00154	484	.	A	C	.	PASS	.
ERCC-00154	485	.	A	C	.	PASS	.
ERCC-00154	486	.	A	C	.	PASS	.
ERCC-00154	487	.	A	C	.	PASS	.
ERCC-00154	488	.	A	C	.	PASS	.
ERCC-00154	489	.	A	C	.	PASS	.
ERCC-00154	490	.	A	C	.	PASS	.
ERCC-00154	491	.	A	C	.	PASS	.
ERCC-00154	492	.	A	C	.	PASS	.
ERCC-00154	493	.	A	C	.	PASS	.
ERCC-00154	494	.	A	C	.	PASS	.
ERCC-00154	495	.	A	C	.	PASS	.
ERCC-00154	496	.	A	C	.	PASS	.
ERCC-00154	497	.	A	C	.	PASS	.
ERCC-00154	498	.	A	C	.	PASS	.
ERCC-00154	499	.	A	C	.	PASS	.
ERCC-00154	500	.	A	C	.	PASS	.
ERCC-00154	501	.	A	C	.	PASS	.
ERCC-00154	502	.	A	C	.	PASS	.
ERCC-00154	503	.	A	C	.	PASS	.
ERCC-00154	504	.	A	C	.	PASS	.
ERCC-00154	505	.	A	C	.	PASS	.
ERCC-00154	506	.	A	C	.	PASS	.
ERCC-00154	507	.	A	C	.	PASS	.
ERCC-00154	508	.	A	C	.	PASS	.
ERCC-00154	509	.	A	C	.	PASS	.
ERCC-00154	510	.	A	C	.	PASS	.
ERCC-00154	511	.	A	C	.	PASS	.
ERCC-00154	512	.	A	C	.	PASS	.
ERCC-00154	514	.	A	C	.	PASS	.
ERCC-00154	515	.	A	C	.	PASS	.
ERCC-00154	516	.	A	C	.	PASS	.
ERCC-00154	517	.	A	C	.	PASS	.
ERCC-00154	518	.	A	C	.	PASS	.
ERCC-00154	519	.	A	C	.	PASS	.
ERCC-00154	520	.	A	C	.	PASS	.
ERCC-00154	521	.	A	C	.	PASS	.
ERCC-00154	522	.	A	C	.	PASS	.
ERCC-00154	523	.	A	C	.	PASS	.
ERCC-00154	524	.	A	C	.	PASS	.
ERCC-00154	525	.	A	C	.	PASS	.
ERCC-00154	526	.	A	C	.	PASS	.
ERCC-00154	527	.	A	C	.	PASS	.
ERCC-00154	528	.	A	C	.	PASS	.
ERCC-00154	529	.	A	C	.	PASS	.
ERCC-00154	530	.	A	C	.	PASS	.
ERCC-00154	531	.	A	C	.	PASS	.
ERCC-00154	532	.	A	C	.	PASS	.
ERCC-00154	533	.	A	C	.	PASS	.
ERCC-00154	534	.	A	C	.	PASS	.
ERCC-00154	535	.	A	C	.	PASS	.
ERCC-00154	536	.	A	C	.	PASS	.
ERCC-00154	537	.	A	C	.	PASS	.
ERCC-00156	419	.	A	C	.	PASS	.
ERCC-00156	420	.	A	C	.	PASS	.
ERCC-00156	421	.	A	C	.	PASS	.
ERCC-00156	422	.	A	C	.	PASS	.
ERCC-00156	423	.	A	C	.	PASS	.
ERCC-00156	424	.	A	C	.	PASS	.
ERCC-00156	425	.	A	C	.	PASS	.
ERCC-00156	426	.	A	C	.	PASS	.
ERCC-00156	427	.	A	C	.	PASS	.
ERCC-00156	428	.	A	C	.	PASS	.
ERCC-00156	429	.	A	C	.	PASS	.
ERCC-00156	430	.	A	C	.	PASS	.
ERCC-00156	431	.	A	C	.	PASS	.
ERCC-00156	432	.	A	C	.	PASS	.
ERCC-00156	433	.	A	C	.	PASS	.
ERCC-00156	434	.	A	C	.	PASS	.
ERCC-00156	435	.	A	C	.	PASS	.
ERCC-00156	436	.	A	C	.	PASS	.
ERCC-00156	437	.	A	C	.	PASS	.
ERCC-00156	438	.	A	C	.	PASS	.
ERCC-00156	439	.	A	C	.	PASS	.
ERCC-00156	440	.	A	C	.	PASS	.
ERCC-00156	441	.	A	C	.	PASS	.
ERCC-00156	442	.	A	C	.	PASS	.
ERCC-00156	443	.	A	C	.	PASS	.
ERCC-00156	444	.	A	C	.	PASS	.
ERCC-00156	445	.	A	C	.	PASS	.
ERCC-00156	446	.	A	C	.	PASS	.
ERCC-00156	447	.	A	C	.	PASS	.
ERCC-00156	448	.	A	C	.	PASS	.
ERCC-00156	449	.	A	C	.	PASS	.
ERCC-00156	450	.	A	C	.	PASS	.
ERCC-00156	451	.	A	C	.	PASS	.
ERCC-00156	452	.	A	C	.	PASS	.
ERCC-00156	453	.	A	C	.	PASS	.
ERCC-00156	454	.	A	C	.	PASS	.
ERCC-00156	455	.	A	C	.	PASS	.
ERCC-00156	456	.	A	C	.	PASS	.
ERCC-00156	457	.	A	C	.	PASS	.
ERCC-00156	458	.	A	C	.	PASS	.
ERCC-00156	459	.	A	C	.	PASS	.
ERCC-00156	460	.	A	C	.	PASS	.
ERCC-00156	461	.	A	C	.	PASS	.
ERCC-00156	462	.	A	C	.	PASS	.
ERCC-00156	463	.	A	C	.	PASS	.
ERCC-00156	464	.	A	C	.	PASS	.
ERCC-00156	465	.	A	C	.	PASS	.
ERCC-00156	466	.	A	C	.	PASS	.
ERCC-00156	467	.	A	C	.	PASS	.
ERCC-00156	468	.	A	C	.	PASS	.
ERCC-00156	469	.	A	C	.	PASS	.
ERCC-00156	471	.	A	C	.	PASS	.
ERCC-00156	472	.	A	C	.	PASS	.
ERCC-00156	473	.	A	C	.	PASS	.
ERCC-00156	474	.	A	C	.	PASS	.
ERCC-00156	475	.	A	C	.	PASS	.
ERCC-00156	476	.	A	C	.	PASS	.
ERCC-00156	477	.	A	C	.	PASS	.
ERCC-00156	478	.	A	C	.	PASS	.
ERCC-00156	479	.	A	C	.	PASS	.
ERCC-00156	480	.	A	C	.	PASS	.
ERCC-00156	481	.	A	C	.	PASS	.
ERCC-00156	482	.	A	C	.	PASS	.
ERCC-00156	483	.	A	C	.	PASS	.
ERCC-00156	484	.	A	C	.	PASS	.
ERCC-00156	485	.	A	C	.	PASS	.
ERCC-00156	486	.	A	C	.	PASS	.
ERCC-00156	487	.	A	C	.	PASS	.
ERCC-00156	488	.	A	C	.	PASS	.
ERCC-00156	489	.	A	C	.	PASS	.
ERCC-00156	490	.	A	C	.	PASS	.
ERCC-00156	491	.	A	C	.	PASS	.
ERCC-00156	492	.	A	C	.	PASS	.
ERCC-00156	493	.	A	C	.	PASS	.
ERCC-00156	494	.	A	C	.	PASS	.
ERCC-00157	941	.	A	C	.	PASS	.
ERCC-00157	942	.	A	C	.	PASS	.
ERCC-00157	943	.	A	C	.	PASS	.
ERCC-00157	944	.	A	C	.	PASS	.
ERCC-00157	945	.	A	C	.	PASS	.
ERCC-00157	946	.	A	C	.	PASS	.
ERCC-00157	947	.	A	C	.	PASS	.
ERCC-00157	948	.	A	C	.	PASS	.
ERCC-00157	949	.	A	C	.	PASS	.
ERCC-00157	950	.	A	C	.	PASS	.
ERCC-00157	951	.	A	C	.	PASS	.
ERCC-00157	952	.	A	C	.	PASS	.
ERCC-00157	953	.	A	C	.	PASS	.
ERCC-00157	954	.	A	C	.	PASS	.
ERCC-00157	955	.	A	C	.	PASS	.
ERCC-00157	956	.	A	C	.	PASS	.
ERCC-00157	957	.	A	C	.	PASS	.
ERCC-00157	958	.	A	C	.	PASS	.
ERCC-00157	959	.	A	C	.	PASS	.
ERCC-00157	960	.	A	C	.	PASS	.
ERCC-00157	961	.	A	C	.	PASS	.
ERCC-00157	962	.	A	C	.	PASS	.
ERCC-00157	963	.	A	C	.	PASS	.
ERCC-00157	964	.	A	C	.	PASS	.
ERCC-00157	965	.	A	C	.	PASS	.
ERCC-00157	966	.	A	C	.	PASS	.
ERCC-00157	967	.	A	C	.	PASS	.
ERCC-00157	968	.	A	C	.	PASS	.
ERCC-00157	969	.	A	C	.	PASS	.
ERCC-00157	970	.	A	C	.	PASS	.
ERCC-00157	971	.	A	C	.	PASS	.
ERCC-00157	972	.	A	C	.	PASS	.
ERCC-00157	973	.	A	C	.	PASS	.
ERCC-00157	974	.	A	C	.	PASS	.
ERCC-00157	975	.	A	C	.	PASS	.
ERCC-00157	976	.	A	C	.	PASS	.
ERCC-00157	977	.	A	C	.	PASS	.
ERCC-00157	978	.	A	C	.	PASS	.
ERCC-00157	979	.	A	C	.	PASS	.
ERCC-00157	980	.	A	C	.	PASS	.
ERCC-00157	981	.	A	C	.	PASS	.
ERCC-00157	982	.	A	C	.	PASS	.
ERCC-00157	983	.	A	C	.	PASS	.
ERCC-00157	984	.	A	C	.	PASS	.
ERCC-00157	985	.	A	C	.	PASS	.
ERCC-00157	986	.	A	C	.	PASS	.
ERCC-00157	987	.	A	C	.	PASS	.
ERCC-00157	988	.	A	C	.	PASS	.
ERCC-00157	989	.	A	C	.	PASS	.
ERCC-00157	990	.	A	C	.	PASS	.
ERCC-00157	991	.	A	C	.	PASS	.
ERCC-00157	996	.	A	C	.	PASS	.
ERCC-00157	997	.	A	C	.	PASS	.
ERCC-00157	998	.	A	C	.	PASS	.
ERCC-00157	999	.	A	C	.	PASS	.
ERCC-00157	1000	.	A	C	.	PASS	.
ERCC-00157	1001	.	A	C	.	PASS	.
ERCC-00157	1002	.	A	C	.	PASS	.
ERCC-00157	1003	.	A	C	.	PASS	.
ERCC-00157	1004	.	A	C	.	PASS	.
ERCC-00157	1005	.	A	C	.	PASS	.
ERCC-00157	1006	.	A	C	.	PASS	.
ERCC-00157	1007	.	A	C	.	PASS	.
ERCC-00157	1008	.	A	C	.	PASS	.
ERCC-00157	1009	.	A	C	.	PASS	.
ERCC-00157	1010	.	A	C	.	PASS	.
ERCC-00157	1011	.	A	C	.	PASS	.
ERCC-00157	1012	.	A	C	.	PASS	.
ERCC-00157	1013	.	A	C	.	PASS	.
ERCC-00157	1014	.	A	C	.	PASS	.
ERCC-00157	1015	.	A	C	.	PASS	.
ERCC-00157	1016	.	A	C	.	PASS	.
ERCC-00157	1017	.	A	C	.	PASS	.
ERCC-00157	1018	.	A	C	.	PASS	.
ERCC-00157	1019	.	A	C	.	PASS	.
ERCC-00158	940	.	A	C	.	PASS	.
ERCC-00158	941	.	A	C	.	PASS	.
ERCC-00158	942	.	A	C	.	PASS	.
ERCC-00158	943	.	A	C	.	PASS	.
ERCC-00158	944	.	A	C	.	PASS	.
ERCC-00158	945	.	A	C	.	PASS	.
ERCC-00158	946	.	A	C	.	PASS	.
ERCC-00158	947	.	A	C	.	PASS	.
ERCC-00158	948	.	A	C	.	PASS	.
ERCC-00158	949	.	A	C	.	PASS	.
ERCC-00158	950	.	A	C	.	PASS	.
ERCC-00158	951	.	A	C	.	PASS	.
ERCC-00158	952	.	A	C	.	PASS	.
ERCC-00158	953	.	A	C	.	PASS	.
ERCC-00158	954	.	A	C	.	PASS	.
ERCC-00158	955	.	A	C	.	PASS	.
ERCC-00158	956	.	A	C	.	PASS	.
ERCC-00158	957	.	A	C	.	PASS	.
ERCC-00158	958	.	A	C	.	PASS	.
ERCC-00158	959	.	A	C	.	PASS	.
ERCC-00158	960	.	A	C	.	PASS	.
ERCC-00158	961	.	A	C	.	PASS	.
ERCC-00158	962	.	A	C	.	PASS	.
ERCC-00158	963	.	A	C	.	PASS	.
ERCC-00158	964	.	A	C	.	PASS	.
ERCC-00158	965	.	A	C	.	PASS	.
ERCC-00158	966	.	A	C	.	PASS	.
ERCC-00158	967	.	A	C	.	PASS	.
ERCC-00158	968	.	A	C	.	PASS	.
ERCC-00158	969	.	A	C	.	PASS	.
ERCC-00158	970	.	A	C	.	PASS	.
ERCC-00158	971	.	A	C	.	PASS	.
ERCC-00158	972	.	A	C	.	PASS	.
ERCC-00158	973	.	A	C	.	PASS	.
ERCC-00158	974	.	A	C	.	PASS	.
ERCC-00158	975	.	A	C	.	PASS	.
ERCC-00158	976	.	A	C	.	PASS	.
ERCC-00158	977	.	A	C	.	PASS	.
ERCC-00158	978	.	A	C	.	PASS	.
ERCC-00158	979	.	A	C	.	PASS	.
ERCC-00158	980	.	A	C	.	PASS	.
ERCC-00158	981	.	A	C	.	PASS	.
ERCC-00158	982	.	A	C	.	PASS	.
ERCC-00158	983	.	A	C	.	PASS	.
ERCC-00158	984	.	A	C	.	PASS	.
ERCC-00158	985	.	A	C	.	PASS	.
ERCC-00158	986	.	A	C	.	PASS	.
ERCC-00158	987	.	A	C	.	PASS	.
ERCC-00158	988	.	A	C	.	PASS	.
ERCC-00158	989	.	A	C	.	PASS	.
ERCC-00158	990	.	A	C	.	PASS	.
ERCC-00158	999	.	A	C	.	PASS	.
ERCC-00158	1000	.	A	C	.	PASS	.
ERCC-00158	1001	.	A	C	.	PASS	.
ERCC-00158	1002	.	A	C	.	PASS	.
ERCC-00158	1003	.	A	C	.	PASS	.
ERCC-00158	1004	.	A	C	.	PASS	.
ERCC-00158	1005	.	A	C	.	PASS	.
ERCC-00158	1006	.	A	C	.	PASS	.
ERCC-00158	1007	.	A	C	.	PASS	.
ERCC-00158	1008	.	A	C	.	PASS	.
ERCC-00158	1009	.	A	C	.	PASS	.
ERCC-00158	1010	.	A	C	.	PASS	.
ERCC-00158	1011	.	A	C	.	PASS	.
ERCC-00158	1012	.	A	C	.	PASS	.
ERCC-00158	1013	.	A	C	.	PASS	.
ERCC-00158	1014	.	A	C	.	PASS	.
ERCC-00158	1015	.	A	C	.	PASS	.
ERCC-00158	1016	.	A	C	.	PASS	.
ERCC-00158	1017	.	A	C	.	PASS	.
ERCC-00158	1018	.	A	C	.	PASS	.
ERCC-00158	1019	.	A	C	.	PASS	.
ERCC-00158	1020	.	A	C	.	PASS	.
ERCC-00158	1021	.	A	C	.	PASS	.
ERCC-00160	666	.	A	C	.	PASS	.
ERCC-00160	667	.	A	C	.	PASS	.
ERCC-00160	668	.	A	C	.	PASS	.
ERCC-00160	669	.	A	C	.	PASS	.
ERCC-00160	670	.	A	C	.	PASS	.
ERCC-00160	671	.	A	C	.	PASS	.
ERCC-00160	672	.	A	C	.	PASS	.
ERCC-00160	673	.	A	C	.	PASS	.
ERCC-00160	674	.	A	C	.	PASS	.
ERCC-00160	675	.	A	C	.	PASS	.
ERCC-00160	676	.	A	C	.	PASS	.
ERCC-00160	677	.	A	C	.	PASS	.
ERCC-00160	678	.	A	C	.	PASS	.
ERCC-00160	679	.	A	C	.	PASS	.
ERCC-00160	680	.	A	C	.	PASS	.
ERCC-00160	681	.	A	C	.	PASS	.
ERCC-00160	682	.	A	C	.	PASS	.
ERCC-00160	683	.	A	C	.	PASS	.
ERCC-00160	684	.	A	C	.	PASS	.
ERCC-00160	685	.	A	C	.	PASS	.
ERCC-00160	686	.	A	C	.	PASS	.
ERCC-00160	687	.	A	C	.	PASS	.
ERCC-00160	688	.	A	C	.	PASS	.
ERCC-00160	689	.	A	C	.	PASS	.
ERCC-00160	690	.	A	C	.	PASS	.
ERCC-00160	691	.	A	C	.	PASS	.
ERCC-00160	692	.	A	C	.	PASS	.
ERCC-00160	693	.	A	C	.	PASS	.
ERCC-00160	694	.	A	C	.	PASS	.
ERCC-00160	695	.	A	C	.	PASS	.
ERCC-00160	696	.	A	C	.	PASS	.
ERCC-00160	697	.	A	C	.	PASS	.
ERCC-00160	698	.	A	C	.	PASS	.
ERCC-00160	699	.	A	C	.	PASS	.
ERCC-00160	700	.	A	C	.	PASS	.
ERCC-00160	701	.	A	C	.	PASS	.
ERCC-00160	702	.	A	C	.	PASS	.
ERCC-00160	703	.	A	C	.	PASS	.
ERCC-00160	704	.	A	C	.	PASS	.
ERCC-00160	705	.	A	C	.	PASS	.
ERCC-00160	706	.	A	C	.	PASS	.
ERCC-00160	707	.	A	C	.	PASS	.
ERCC-00160	708	.	A	C	.	PASS	.
ERCC-00160	709	.	A	C	.	PASS	.
ERCC-00160	710	.	A	C	.	PASS	.
ERCC-00160	711	.	A	C	.	PASS	.
ERCC-00160	712	.	A	C	.	PASS	.
ERCC-00160	713	.	A	C	.	PASS	.
ERCC-00160	714	.	A	C	.	PASS	.
ERCC-00160	715	.	A	C	.	PASS	.
ERCC-00160	716	.	A	C	.	PASS	.
ERCC-00160	720	.	A	C	.	PASS	.
ERCC-00160	721	.	A	C	.	PASS	.
ERCC-00160	722	.	A	C	.	PASS	.
ERCC-00160	723	.	A	C	.	PASS	.
ERCC-00160	724	.	A	C	.	PASS	.
ERCC-00160	725	.	A	C	.	PASS	.
ERCC-00160	726	.	A	C	.	PASS	.
ERCC-00160	727	.	A	C	.	PASS	.
ERCC-00160	728	.	A	C	.	PASS	.
ERCC-00160	729	.	A	C	.	PASS	.
ERCC-00160	730	.	A	C	.	PASS	.
ERCC-00160	731	.	A	C	.	PASS	.
ERCC-00160	732	.	A	C	.	PASS	.
ERCC-00160	733	.	A	C	.	PASS	.
ERCC-00160	734	.	A	C	.	PASS	.
ERCC-00160	735	.	A	C	.	PASS	.
ERCC-00160	736	.	A	C	.	PASS	.
ERCC-00160	737	.	A	C	.	PASS	.
ERCC-00160	738	.	A	C	.	PASS	.
ERCC-00160	739	.	A	C	.	PASS	.
ERCC-00160	740	.	A	C	.	PASS	.
ERCC-00160	741	.	A	C	.	PASS	.
ERCC-00160	742	.	A	C	.	PASS	.
ERCC-00160	743	.	A	C	.	PASS	.
ERCC-00162	443	.	A	C	.	PASS	.
ERCC-00162	444	.	A	C	.	PASS	.
ERCC-00162	445	.	A	C	.	PASS	.
ERCC-00162	446	.	A	C	.	PASS	.
ERCC-00162	447	.	A	C	.	PASS	.
ERCC-00162	448	.	A	C	.	PASS	.
ERCC-00162	449	.	A	C	.	PASS	.
ERCC-00162	450	.	A	C	.	PASS	.
ERCC-00162	451	.	A	C	.	PASS	.
ERCC-00162	452	.	A	C	.	PASS	.
ERCC-00162	453	.	A	C	.	PASS	.
ERCC-00162	454	.	A	C	.	PASS	.
ERCC-00162	455	.	A	C	.	PASS	.
ERCC-00162	456	.	A	C	.	PASS	.
ERCC-00162	457	.	A	C	.	PASS	.
ERCC-00162	458	.	A	C	.	PASS	.
ERCC-00162	459	.	A	C	.	PASS	.
ERCC-00162	460	.	A	C	.	PASS	.
ERCC-00162	461	.	A	C	.	PASS	.
ERCC-00162	462	.	A	C	.	PASS	.
ERCC-00162	463	.	A	C	.	PASS	.
ERCC-00162	464	.	A	C	.	PASS	.
ERCC-00162	465	.	A	C	.	PASS	.
ERCC-00162	466	.	A	C	.	PASS	.
ERCC-00162	467	.	A	C	.	PASS	.
ERCC-00162	468	.	A	C	.	PASS	.
ERCC-00162	469	.	A	C	.	PASS	.
ERCC-00162	470	.	A	C	.	PASS	.
ERCC-00162	471	.	A	C	.	PASS	.
ERCC-00162	472	.	A	C	.	PASS	.
ERCC-00162	473	.	A	C	.	PASS	.
ERCC-00162	474	.	A	C	.	PASS	.
ERCC-00162	475	.	A	C	.	PASS	.
ERCC-00162	476	.	A	C	.	PASS	.
ERCC-00162	477	.	A	C	.	PASS	.
ERCC-00162	478	.	A	C	.	PASS	.
ERCC-00162	479	.	A	C	.	PASS	.
ERCC-00162	480	.	A	C	.	PASS	.
ERCC-00162	481	.	A	C	.	PASS	.
ERCC-00162	482	.	A	C	.	PASS	.
ERCC-00162	483	.	A	C	.	PASS	.
ERCC-00162	484	.	A	C	.	PASS	.
ERCC-00162	485	.	A	C	.	PASS	.
ERCC-00162	486	.	A	C	.	PASS	.
ERCC-00162	487	.	A	C	.	PASS	.
ERCC-00162	488	.	A	C	.	PASS	.
ERCC-00162	489	.	A	C	.	PASS	.
ERCC-00162	490	.	A	C	.	PASS	.
ERCC-00162	491	.	A	C	.	PASS	.
ERCC-00162	492	.	A	C	.	PASS	.
ERCC-00162	493	.	A	C	.	PASS	.
ERCC-00162	500	.	A	C	.	PASS	.
ERCC-00162	501	.	A	C	.	PASS	.
ERCC-00162	502	.	A	C	.	PASS	.
ERCC-00162	503	.	A	C	.	PASS	.
ERCC-00162	504	.	A	C	.	PASS	.
ERCC-00162	505	.	A	C	.	PASS	.
ERCC-00162	506	.	A	C	.	PASS	.
ERCC-00162	507	.	A	C	.	PASS	.
ERCC-00162	508	.	A	C	.	PASS	.
ERCC-00162	509	.	A	C	.	PASS	.
ERCC-00162	510	.	A	C	.	PASS	.
ERCC-00162	511	.	A	C	.	PASS	.
ERCC-00162	512	.	A	C	.	PASS	.
ERCC-00162	513	.	A	C	.	PASS	.
ERCC-00162	514	.	A	C	.	PASS	.
ERCC-00162	515	.	A	C	.	PASS	.
ERCC-00162	516	.	A	C	.	PASS	.
ERCC-00162	517	.	A	C	.	PASS	.
ERCC-00162	518	.	A	C	.	PASS	.
ERCC-00162	519	.	A	C	.	PASS	.
ERCC-00162	520	.	A	C	.	PASS	.
ERCC-00162	521	.	A	C	.	PASS	.
ERCC-00162	522	.	A	C	.	PASS	.
ERCC-00162	523	.	A	C	.	PASS	.
ERCC-00163	468	.	A	C	.	PASS	.
ERCC-00163	469	.	A	C	.	PASS	.
ERCC-00163	470	.	A	C	.	PASS	.
ERCC-00163	471	.	A	C	.	PASS	.
ERCC-00163	472	.	A	C	.	PASS	.
ERCC-00163	473	.	A	C	.	PASS	.
ERCC-00163	474	.	A	C	.	PASS	.
ERCC-00163	475	.	A	C	.	PASS	.
ERCC-00163	476	.	A	C	.	PASS	.
ERCC-00163	477	.	A	C	.	PASS	.
ERCC-00163	478	.	A	C	.	PASS	.
ERCC-00163	479	.	A	C	.	PASS	.
ERCC-00163	480	.	A	C	.	PASS	.
ERCC-00163	481	.	A	C	.	PASS	.
ERCC-00163	482	.	A	C	.	PASS	.
ERCC-00163	483	.	A	C	.	PASS	.
ERCC-00163	484	.	A	C	.	PASS	.
ERCC-00163	485	.	A	C	.	PASS	.
ERCC-00163	486	.	A	C	.	PASS	.
ERCC-00163	487	.	A	C	.	PASS	.
ERCC-00163	488	.	A	C	.	PASS	.
ERCC-00163	489	.	A	C	.	PASS	.
ERCC-00163	490	.	A	C	.	PASS	.
ERCC-00163	491	.	A	C	.	PASS	.
ERCC-00163	492	.	A	C	.	PASS	.
ERCC-00163	493	.	A	C	.	PASS	.
ERCC-00163	494	.	A	C	.	PASS	.
ERCC-00163	495	.	A	C	.	PASS	.
ERCC-00163	496	.	A	C	.	PASS	.
ERCC-00163	497	.	A	C	.	PASS	.
ERCC-00163	498	.	A	C	.	PASS	.
ERCC-00163	499	.	A	C	.	PASS	.
ERCC-00163	500	.	A	C	.	PASS	.
ERCC-00163	501	.	A	C	.	PASS	.
ERCC-00163	502	.	A	C	.	PASS	.
ERCC-00163	503	.	A	C	.	PASS	.
ERCC-00163	504	.	A	C	.	PASS	.
ERCC-00163	505	.	A	C	.	PASS	.
ERCC-00163	506	.	A	C	.	PASS	.
ERCC-00163	507	.	A	C	.	PASS	.
ERCC-00163	508	.	A	C	.	PASS	.
ERCC-00163	509	.	A	C	.	PASS	.
ERCC-00163	510	.	A	C	.	PASS	.
ERCC-00163	511	.	A	C	.	PASS	.
ERCC-00163	512	.	A	C	.	PASS	.
ERCC-00163	513	.	A	C	.	PASS	.
ERCC-00163	514	.	A	C	.	PASS	.
ERCC-00163	515	.	A	C	.	PASS	.
ERCC-00163	516	.	A	C	.	PASS	.
ERCC-00163	517	.	A	C	.	PASS	.
ERCC-00163	518	.	A	C	.	PASS	.
ERCC-00163	520	.	A	C	.	PASS	.
ERCC-00163	521	.	A	C	.	PASS	.
ERCC-00163	522	.	A	C	.	PASS	.
ERCC-00163	523	.	A	C	.	PASS	.
ERCC-00163	524	.	A	C	.	PASS	.
ERCC-00163	525	.	A	C	.	PASS	.
ERCC-00163	526	.	A	C	.	PASS	.
ERCC-00163	527	.	A	C	.	PASS	.
ERCC-00163	528	.	A	C	.	PASS	.
ERCC-00163	529	.	A	C	.	PASS	.
ERCC-00163	530	.	A	C	.	PASS	.
ERCC-00163	531	.	A	C	.	PASS	.
ERCC-00163	532	.	A	C	.	PASS	.
ERCC-00163	533	.	A	C	.	PASS	.
ERCC-00163	534	.	A	C	.	PASS	.
ERCC-00163	535	.	A	C	.	PASS	.
ERCC-00163	536	.	A	C	.	PASS	.
ERCC-00163	537	.	A	C	.	PASS	.
ERCC-00163	538	.	A	C	.	PASS	.
ERCC-00163	539	.	A	C	.	PASS	.
ERCC-00163	540	.	A	C	.	PASS	.
ERCC-00163	541	.	A	C	.	PASS	.
ERCC-00163	542	.	A	C	.	PASS	.
ERCC-00163	543	.	A	C	.	PASS	.
ERCC-00164	248	.	A	C	.	PASS	.
ERCC-00164	252	.	A	C	.	PASS	.
ERCC-00164	253	.	A	C	.	PASS	.
ERCC-00164	257	.	A	C	.	PASS	.
ERCC-00164	285	.	A	C	.	PASS	.
ERCC-00164	299	.	A	C	.	PASS	.
ERCC-00164	940	.	A	C	.	PASS	.
ERCC-00164	941	.	A	C	.	PASS	.
ERCC-00164	942	.	A	C	.	PASS	.
ERCC-00164	943	.	A	C	.	PASS	.
ERCC-00164	944	.	A	C	.	PASS	.
ERCC-00164	945	.	A	C	.	PASS	.
ERCC-00164	946	.	A	C	.	PASS	.
ERCC-00164	947	.	A	C	.	PASS	.
ERCC-00164	948	.	A	C	.	PASS	.
ERCC-00164	949	.	A	C	.	PASS	.
ERCC-00164	950	.	A	C	.	PASS	.
ERCC-00164	951	.	A	C	.	PASS	.
ERCC-00164	952	.	A	C	.	PASS	.
ERCC-00164	953	.	A	C	.	PASS	.
ERCC-00164	954	.	A	C	.	PASS	.
ERCC-00164	955	.	A	C	.	PASS	.
ERCC-00164	956	.	A	C	.	PASS	.
ERCC-00164	957	.	A	C	.	PASS	.
ERCC-00164	958	.	A	C	.	PASS	.
ERCC-00164	959	.	A	C	.	PASS	.
ERCC-00164	960	.	A	C	.	PASS	.
ERCC-00164	961	.	A	C	.	PASS	.
ERCC-00164	962	.	A	C	.	PASS	.
ERCC-00164	963	.	A	C	.	PASS	.
ERCC-00164	964	.	A	C	.	PASS	.
ERCC-00164	965	.	A	C	.	PASS	.
ERCC-00164	966	.	A	C	.	PASS	.
ERCC-00164	967	.	A	C	.	PASS	.
ERCC-00164	968	.	A	C	.	PASS	.
ERCC-00164	969	.	A	C	.	PASS	.
ERCC-00164	970	.	A	C	.	PASS	.
ERCC-00164	971	.	A	C	.	PASS	.
ERCC-00164	972	.	A	C	.	PASS	.
ERCC-00164	973	.	A	C	.	PASS	.
ERCC-00164	974	.	A	C	.	PASS	.
ERCC-00164	975	.	A	C	.	PASS	.
ERCC-00164	976	.	A	C	.	PASS	.
ERCC-00164	977	.	A	C	.	PASS	.
ERCC-00164	978	.	A	C	.	PASS	.
ERCC-00164	979	.	A	C	.	PASS	.
ERCC-00164	980	.	A	C	.	PASS	.
ERCC-00164	981	.	A	C	.	PASS	.
ERCC-00164	982	.	A	C	.	PASS	.
ERCC-00164	983	.	A	C	.	PASS	.
ERCC-00164	984	.	A	C	.	PASS	.
ERCC-00164	985	.	A	C	.	PASS	.
ERCC-00164	986	.	A	C	.	PASS	.
ERCC-00164	987	.	A	C	.	PASS	.
ERCC-00164	988	.	A	C	.	PASS	.
ERCC-00164	989	.	A	C	.	PASS	.
ERCC-00164	990	.	A	C	.	PASS	.
ERCC-00164	1000	.	A	C	.	PASS	.
ERCC-00164	1001	.	A	C	.	PASS	.
ERCC-00164	1002	.	A	C	.	PASS	.
ERCC-00164	1003	.	A	C	.	PASS	.
ERCC-00164	1004	.	A	C	.	PASS	.
ERCC-00164	1005	.	A	C	.	PASS	.
ERCC-00164	1006	.	A	C	.	PASS	.
ERCC-00164	1007	.	A	C	.	PASS	.
ERCC-00164	1008	.	A	C	.	PASS	.
ERCC-00164	1009	.	A	C	.	PASS	.
ERCC-00164	1010	.	A	C	.	PASS	.
ERCC-00164	1011	.	A	C	.	PASS	.
ERCC-00164	1012	.	A	C	.	PASS	.
ERCC-00164	1013	.	A	C	.	PASS	.
ERCC-00164	1014	.	A	C	.	PASS	.
ERCC-00164	1015	.	A	C	.	PASS	.
ERCC-00164	1016	.	A	C	.	PASS	.
ERCC-00164	1017	.	A	C	.	PASS	.
ERCC-00164	1018	.	A	C	.	PASS	.
ERCC-00164	1019	.	A	C	.	PASS	.
ERCC-00164	1020	.	A	C	.	PASS	.
ERCC-00164	1021	.	A	C	.	PASS	.
ERCC-00164	1022	.	A	C	.	PASS	.
ERCC-00165	794	.	A	C	.	PASS	.
ERCC-00165	795	.	A	C	.	PASS	.
ERCC-00165	796	.	A	C	.	PASS	.
ERCC-00165	797	.	A	C	.	PASS	.
ERCC-00165	798	.	A	C	.	PASS	.
ERCC-00165	799	.	A	C	.	PASS	.
ERCC-00165	800	.	A	C	.	PASS	.
ERCC-00165	801	.	A	C	.	PASS	.
ERCC-00165	802	.	A	C	.	PASS	.
ERCC-00165	803	.	A	C	.	PASS	.
ERCC-00165	804	.	A	C	.	PASS	.
ERCC-00165	805	.	A	C	.	PASS	.
ERCC-00165	806	.	A	C	.	PASS	.
ERCC-00165	807	.	A	C	.	PASS	.
ERCC-00165	808	.	A	C	.	PASS	.
ERCC-00165	809	.	A	C	.	PASS	.
ERCC-00165	810	.	A	C	.	PASS	.
ERCC-00165	811	.	A	C	.	PASS	.
ERCC-00165	812	.	A	C	.	PASS	.
ERCC-00165	813	.	A	C	.	PASS	.
ERCC-00165	814	.	A	C	.	PASS	.
ERCC-00165	815	.	A	C	.	PASS	.
ERCC-00165	816	.	A	C	.	PASS	.
ERCC-00165	817	.	A	C	.	PASS	.
ERCC-00165	818	.	A	C	.	PASS	.
ERCC-00165	819	.	A	C	.	PASS	.
ERCC-00165	820	.	A	C	.	PASS	.
ERCC-00165	821	.	A	C	.	PASS	.
ERCC-00165	822	.	A	C	.	PASS	.
ERCC-00165	823	.	A	C	.	PASS	.
ERCC-00165	824	.	A	C	.	PASS	.
ERCC-00165	825	.	A	C	.	PASS	.
ERCC-00165	826	.	A	C	.	PASS	.
ERCC-00165	827	.	A	C	.	PASS	.
ERCC-00165	828	.	A	C	.	PASS	.
ERCC-00165	829	.	A	C	.	PASS	.
ERCC-00165	830	.	A	C	.	PASS	.
ERCC-00165	831	.	A	C	.	PASS	.
ERCC-00165	832	.	A	C	.	PASS	.
ERCC-00165	833	.	A	C	.	PASS	.
ERCC-00165	834	.	A	C	.	PASS	.
ERCC-00165	835	.	A	C	.	PASS	.
ERCC-00165	836	.	A	C	.	PASS	.
ERCC-00165	837	.	A	C	.	PASS	.
ERCC-00165	838	.	A	C	.	PASS	.
ERCC-00165	839	.	A	C	.	PASS	.
ERCC-00165	840	.	A	C	.	PASS	.
ERCC-00165	841	.	A	C	.	PASS	.
ERCC-00165	842	.	A	C	.	PASS	.
ERCC-00165	843	.	A	C	.	PASS	.
ERCC-00165	844	.	A	C	.	PASS	.
ERCC-00165	849	.	A	C	.	PASS	.
ERCC-00165	850	.	A	C	.	PASS	.
ERCC-00165	851	.	A	C	.	PASS	.
ERCC-00165	852	.	A	C	.	PASS	.
ERCC-00165	853	.	A	C	.	PASS	.
ERCC-00165	854	.	A	C	.	PASS	.
ERCC-00165	855	.	A	C	.	PASS	.
ERCC-00165	856	.	A	C	.	PASS	.
ERCC-00165	857	.	A	C	.	PASS	.
ERCC-00165	858	.	A	C	.	PASS	.
ERCC-00165	859	.	A	C	.	PASS	.
ERCC-00165	860	.	A	C	.	PASS	.
ERCC-00165	861	.	A	C	.	PASS	.
ERCC-00165	862	.	A	C	.	PASS	.
ERCC-00165	863	.	A	C	.	PASS	.
ERCC-00165	864	.	A	C	.	PASS	.
ERCC-00165	865	.	A	C	.	PASS	.
ERCC-00165	866	.	A	C	.	PASS	.
ERCC-00165	867	.	A	C	.	PASS	.
ERCC-00165	868	.	A	C	.	PASS	.
ERCC-00165	869	.	A	C	.	PASS	.
ERCC-00165	870	.	A	C	.	PASS	.
ERCC-00165	871	.	A	C	.	PASS	.
ERCC-00165	872	.	A	C	.	PASS	.
ERCC-00168	936	.	A	C	.	PASS	.
ERCC-00168	937	.	A	C	.	PASS	.
ERCC-00168	938	.	A	C	.	PASS	.
ERCC-00168	939	.	A	C	.	PASS	.
ERCC-00168	940	.	A	C	.	PASS	.
ERCC-00168	941	.	A	C	.	PASS	.
ERCC-00168	942	.	A	C	.	PASS	.
ERCC-00168	943	.	A	C	.	PASS	.
ERCC-00168	944	.	A	C	.	PASS	.
ERCC-00168	945	.	A	C	.	PASS	.
ERCC-00168	946	.	A	C	.	PASS	.
ERCC-00168	947	.	A	C	.	PASS	.
ERCC-00168	948	.	A	C	.	PASS	.
ERCC-00168	949	.	A	C	.	PASS	.
ERCC-00168	950	.	A	C	.	PASS	.
ERCC-00168	951	.	A	C	.	PASS	.
ERCC-00168	952	.	A	C	.	PASS	.
ERCC-00168	953	.	A	C	.	PASS	.
ERCC-00168	954	.	A	C	.	PASS	.
ERCC-00168	955	.	A	C	.	PASS	.
ERCC-00168	956	.	A	C	.	PASS	.
ERCC-00168	957	.	A	C	.	PASS	.
ERCC-00168	958	.	A	C	.	PASS	.
ERCC-00168	959	.	A	C	.	PASS	.
ERCC-00168	960	.	A	C	.	PASS	.
ERCC-00168	961	.	A	C	.	PASS	.
ERCC-00168	962	.	A	C	.	PASS	.
ERCC-00168	963	.	A	C	.	PASS	.
ERCC-00168	964	.	A	C	.	PASS	.
ERCC-00168	965	.	A	C	.	PASS	.
ERCC-00168	966	.	A	C	.	PASS	.
ERCC-00168	967	.	A	C	.	PASS	.
ERCC-00168	968	.	A	C	.	PASS	.
ERCC-00168	969	.	A	C	.	PASS	.
ERCC-00168	970	.	A	C	.	PASS	.
ERCC-00168	971	.	A	C	.	PASS	.
ERCC-00168	972	.	A	C	.	PASS	.
ERCC-00168	973	.	A	C	.	PASS	.
ERCC-00168	974	.	A	C	.	PASS	.
ERCC-00168	975	.	A	C	.	PASS	.
ERCC-00168	976	.	A	C	.	PASS	.
ERCC-00168	977	.	A	C	.	PASS	.
ERCC-00168	978	.	A	C	.	PASS	.
ERCC-00168	979	.	A	C	.	PASS	.
ERCC-00168	980	.	A	C	.	PASS	.
ERCC-00168	981	.	A	C	.	PASS	.
ERCC-00168	982	.	A	C	.	PASS	.
ERCC-00168	983	.	A	C	.	PASS	.
ERCC-00168	984	.	A	C	.	PASS	.
ERCC-00168	985	.	A	C	.	PASS	.
ERCC-00168	986	.	A	C	.	PASS	.
ERCC-00168	1000	.	A	C	.	PASS	.
ERCC-00168	1001	.	A	C	.	PASS	.
ERCC-00168	1002	.	A	C	.	PASS	.
ERCC-00168	1003	.	A	C	.	PASS	.
ERCC-00168	1004	.	A	C	.	PASS	.
ERCC-00168	1005	.	A	C	.	PASS	.
ERCC-00168	1006	.	A	C	.	PASS	.
ERCC-00168	1007	.	A	C	.	PASS	.
ERCC-00168	1008	.	A	C	.	PASS	.
ERCC-00168	1009	.	A	C	.	PASS	.
ERCC-00168	1010	.	A	C	.	PASS	.
ERCC-00168	1011	.	A	C	.	PASS	.
ERCC-00168	1012	.	A	C	.	PASS	.
ERCC-00168	1013	.	A	C	.	PASS	.
ERCC-00168	1014	.	A	C	.	PASS	.
ERCC-00168	1015	.	A	C	.	PASS	.
ERCC-00168	1016	.	A	C	.	PASS	.
ERCC-00168	1017	.	A	C	.	PASS	.
ERCC-00168	1018	.	A	C	.	PASS	.
ERCC-00168	1019	.	A	C	.	PASS	.
ERCC-00168	1020	.	A	C	.	PASS	.
ERCC-00168	1021	.	A	C	.	PASS	.
ERCC-00168	1022	.	A	C	.	PASS	.
ERCC-00168	1023	.	A	C	.	PASS	.
ERCC-00168	1024	.	A	C	.	PASS	.
ERCC-00170	941	.	A	C	.	PASS	.
ERCC-00170	942	.	A	C	.	PASS	.
ERCC-00170	943	.	A	C	.	PASS	.
ERCC-00170	944	.	A	C	.	PASS	.
ERCC-00170	945	.	A	C	.	PASS	.
ERCC-00170	946	.	A	C	.	PASS	.
ERCC-00170	947	.	A	C	.	PASS	.
ERCC-00170	948	.	A	C	.	PASS	.
ERCC-00170	949	.	A	C	.	PASS	.
ERCC-00170	950	.	A	C	.	PASS	.
ERCC-00170	951	.	A	C	.	PASS	.
ERCC-00170	952	.	A	C	.	PASS	.
ERCC-00170	953	.	A	C	.	PASS	.
ERCC-00170	954	.	A	C	.	PASS	.
ERCC-00170	955	.	A	C	.	PASS	.
ERCC-00170	956	.	A	C	.	PASS	.
ERCC-00170	957	.	A	C	.	PASS	.
ERCC-00170	958	.	A	C	.	PASS	.
ERCC-00170	959	.	A	C	.	PASS	.
ERCC-00170	960	.	A	C	.	PASS	.
ERCC-00170	961	.	A	C	.	PASS	.
ERCC-00170	962	.	A	C	.	PASS	.
ERCC-00170	963	.	A	C	.	PASS	.
ERCC-00170	964	.	A	C	.	PASS	.
ERCC-00170	965	.	A	C	.	PASS	.
ERCC-00170	966	.	A	C	.	PASS	.
ERCC-00170	967	.	A	C	.	PASS	.
ERCC-00170	968	.	A	C	.	PASS	.
ERCC-00170	969	.	A	C	.	PASS	.
ERCC-00170	970	.	A	C	.	PASS	.
ERCC-00170	971	.	A	C	.	PASS	.
ERCC-00170	972	.	A	C	.	PASS	.
ERCC-00170	973	.	A	C	.	PASS	.
ERCC-00170	974	.	A	C	.	PASS	.
ERCC-00170	975	.	A	C	.	PASS	.
ERCC-00170	976	.	A	C	.	PASS	.
ERCC-00170	977	.	A	C	.	PASS	.
ERCC-00170	978	.	A	C	.	PASS	.
ERCC-00170	979	.	A	C	.	PASS	.
ERCC-00170	980	.	A	C	.	PASS	.
ERCC-00170	981	.	A	C	.	PASS	.
ERCC-00170	982	.	A	C	.	PASS	.
ERCC-00170	983	.	A	C	.	PASS	.
ERCC-00170	984	.	A	C	.	PASS	.
ERCC-00170	985	.	A	C	.	PASS	.
ERCC-00170	986	.	A	C	.	PASS	.
ERCC-00170	987	.	A	C	.	PASS	.
ERCC-00170	988	.	A	C	.	PASS	.
ERCC-00170	989	.	A	C	.	PASS	.
ERCC-00170	990	.	A	C	.	PASS	.
ERCC-00170	991	.	A	C	.	PASS	.
ERCC-00170	1000	.	A	C	.	PASS	.
ERCC-00170	1001	.	A	C	.	PASS	.
ERCC-00170	1002	.	A	C	.	PASS	.
ERCC-00170	1003	.	A	C	.	PASS	.
ERCC-00170	1004	.	A	C	.	PASS	.
ERCC-00170	1005	.	A	C	.	PASS	.
ERCC-00170	1006	.	A	C	.	PASS	.
ERCC-00170	1007	.	A	C	.	PASS	.
ERCC-00170	1008	.	A	C	.	PASS	.
ERCC-00170	1009	.	A	C	.	PASS	.
ERCC-00170	1010	.	A	C	.	PASS	.
ERCC-00170	1011	.	A	C	.	PASS	.
ERCC-00170	1012	.	A	C	.	PASS	.
ERCC-00170	1013	.	A	C	.	PASS	.
ERCC-00170	1014	.	A	C	.	PASS	.
ERCC-00170	1015	.	A	C	.	PASS	.
ERCC-00170	1016	.	A	C	.	PASS	.
ERCC-00170	1017	.	A	C	.	PASS	.
ERCC-00170	1018	.	A	C	.	PASS	.
ERCC-00170	1019	.	A	C	.	PASS	.
ERCC-00170	1020	.	A	C	.	PASS	.
ERCC-00170	1021	.	A	C	.	PASS	.
ERCC-00170	1022	.	A	C	.	PASS	.
ERCC-00170	1023	.	A	C	.	PASS	.
ERCC-00170	1024	.	A	C	.	PASS	.
ERCC-00171	429	.	A	C	.	PASS	.
ERCC-00171	430	.	A	C	.	PASS	.
ERCC-00171	431	.	A	C	.	PASS	.
ERCC-00171	432	.	A	C	.	PASS	.
ERCC-00171	433	.	A	C	.	PASS	.
ERCC-00171	434	.	A	C	.	PASS	.
ERCC-00171	435	.	A	C	.	PASS	.
ERCC-00171	436	.	A	C	.	PASS	.
ERCC-00171	437	.	A	C	.	PASS	.
ERCC-00171	438	.	A	C	.	PASS	.
ERCC-00171	439	.	A	C	.	PASS	.
ERCC-00171	440	.	A	C	.	PASS	.
ERCC-00171	441	.	A	C	.	PASS	.
ERCC-00171	442	.	A	C	.	PASS	.
ERCC-00171	443	.	A	C	.	PASS	.
ERCC-00171	444	.	A	C	.	PASS	.
ERCC-00171	445	.	A	C	.	PASS	.
ERCC-00171	446	.	A	C	.	PASS	.
ERCC-00171	447	.	A	C	.	PASS	.
ERCC-00171	448	.	A	C	.	PASS	.
ERCC-00171	449	.	A	C	.	PASS	.
ERCC-00171	450	.	A	C	.	PASS	.
ERCC-00171	451	.	A	C	.	PASS	.
ERCC-00171	452	.	A	C	.	PASS	.
ERCC-00171	453	.	A	C	.	PASS	.
ERCC-00171	454	.	A	C	.	PASS	.
ERCC-00171	455	.	A	C	.	PASS	.
ERCC-00171	456	.	A	C	.	PASS	.
ERCC-00171	457	.	A	C	.	PASS	.
ERCC-00171	458	.	A	C	.	PASS	.
ERCC-00171	459	.	A	C	.	PASS	.
ERCC-00171	460	.	A	C	.	PASS	.
ERCC-00171	461	.	A	C	.	PASS	.
ERCC-00171	462	.	A	C	.	PASS	.
ERCC-00171	463	.	A	C	.	PASS	.
ERCC-00171	464	.	A	C	.	PASS	.
ERCC-00171	465	.	A	C	.	PASS	.
ERCC-00171	466	.	A	C	.	PASS	.
ERCC-00171	467	.	A	C	.	PASS	.
ERCC-00171	468	.	A	C	.	PASS	.
ERCC-00171	469	.	A	C	.	PASS	.
ERCC-00171	470	.	A	C	.	PASS	.
ERCC-00171	471	.	A	C	.	PASS	.
ERCC-00171	472	.	A	C	.	PASS	.
ERCC-00171	473	.	A	C	.	PASS	.
ERCC-00171	474	.	A	C	.	PASS	.
ERCC-00171	475	.	A	C	.	PASS	.
ERCC-00171	476	.	A	C	.	PASS	.
ERCC-00171	477	.	A	C	.	PASS	.
ERCC-00171	478	.	A	C	.	PASS	.
ERCC-00171	479	.	A	C	.	PASS	.
ERCC-00171	482	.	A	C	.	PASS	.
ERCC-00171	483	.	A	C	.	PASS	.
ERCC-00171	484	.	A	C	.	PASS	.
ERCC-00171	485	.	A	C	.	PASS	.
ERCC-00171	486	.	A	C	.	PASS	.
ERCC-00171	487	.	A	C	.	PASS	.
ERCC-00171	488	.	A	C	.	PASS	.
ERCC-00171	489	.	A	C	.	PASS	.
ERCC-00171	490	.	A	C	.	PASS	.
ERCC-00171	491	.	A	C	.	PASS	.
ERCC-00171	492	.	A	C	.	PASS	.
ERCC-00171	493	.	A	C	.	PASS	.
ERCC-00171	494	.	A	C	.	PASS	.
ERCC-00171	495	.	A	C	.	PASS	.
ERCC-00171	496	.	A	C	.	PASS	.
ERCC-00171	497	.	A	C	.	PASS	.
ERCC-00171	498	.	A	C	.	PASS	.
ERCC-00171	499	.	A	C	.	PASS	.
ERCC-00171	500	.	A	C	.	PASS	.
ERCC-00171	501	.	A	C	.	PASS	.
ERCC-00171	502	.	A	C	.	PASS	.
ERCC-00171	503	.	A	C	.	PASS	.
ERCC-00171	504	.	A	C	.	PASS	.
ERCC-00171	505	.	A	C	.	PASS	.
